# Supplementary material
Source: PubMed Central journal article supplement (PMC4995593)
Supplement: NIHMS807081-supplement-supplem.pdf [file NIHMS807081-supplement-supplem.pdf]

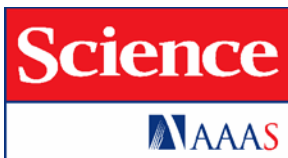

Supplementary Materials for  
**Use of human embryonic stem cells to model pediatric gliomas with  
H3.3K27M histone mutation**

Kosuke Funato, Tamara Major, Peter W. Lewis, C. David Allis, Viviane Tabar\*

\*Corresponding author. E-mail: [tabarv@mskcc.org](mailto:tabarv@mskcc.org)

Published 20 November 2014 on *Science* Express  
DOI: 10.1126/science.1253799

**This PDF file includes**

Materials and Methods  
Figs. S1 to S16  
Tables S1 to S6  
References

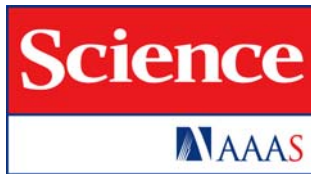

Supplementary Materials for  
**Use of Human Embryonic Stem Cells to Model Pediatric Gliomas with  
H3.3K27M Histone Mutation**

Kosuke Funato<sup>1</sup>, Tamara Major<sup>1</sup>, Peter W. Lewis<sup>2</sup>, C. David Allis<sup>3</sup>, Viviane Tabar<sup>1</sup>

correspondence to: [tabarv@mskcc.org](mailto:tabarv@mskcc.org)

**This PDF file includes:**

Materials and Methods  
Figs. S1 to S16  
Tables S1 to S6

## **Materials and Methods**

### **Cell culture**

hESCs (WA-09; passages 35-45) were maintained at undifferentiated state on irradiated mouse embryonic fibroblasts (MEFs, Globalstem Inc) in medium consisting of DMEM/F12 (Invitrogen) supplemented with 20% Knockout Serum Replacement (KSR, Invitrogen), 10 ng/ml basic fibroblast growth factor (bFGF, R&D Systems), 1 mM L-glutamine (Invitrogen), 100  $\mu$ M non essential amino acids and 0.1 mM  $\beta$ -mercaptoethanol (Sigma-Aldrich). The cells were fed daily and passaged weekly using 6 U/ml dispase. Human primary astrocytes (Sciencell) were maintained in Astrocyte Medium (Sciencell). MRC-5 lung fibroblasts (ATCC, CCL-171) were maintained in DMEM medium supplemented with 10% fetal bovine serum (FBS). Human patient-derived DIPG cells (DIPG-VI, kindly provided by Michelle Monje, Stanford University) were maintained in Neurobasal media (Invitrogen) supplemented with B27 without Vitamin A (Invitrogen), EGF (20ng/ml), bFGF (20 ng/ml, R&D Systems), PDGF-AA and -BB (20 ng/ml, Peprotech) and heparin (10 ng/ml).

### **Neural induction and neural subtype specification**

For neural induction, a modified version of the dual-SMAD inhibition was used (7). Undifferentiated hES-cells were disaggregated using Accutase (Innovative Cell Technology) and plated on Matrigel (BD)-coated dishes at a density of 40,000 cells/cm<sup>2</sup> in MEF-conditioned ESC medium supplemented with 10 ng/ml of bFGF and ROCK inhibitor (Y-27632). When the cells reached the confluent state (2-3 days after plating), they were exposed for 9 days to LDN193189 (200 nM, Stemgent) and SB431542 (10 mM, Tocris) in KSR medium containing DMEM, 15% knockout serum replacement, 2 mM L-glutamine and 10  $\mu$ M  $\beta$ -mercaptoethanol. KSR medium was gradually replaced with N2 medium (25%, 50%, 75%) starting on day 4 of differentiation as described previously. On day 12, cells were dissociated using Accutase and replated in high density conditions (300,000 cells per cm<sup>2</sup>) on dishes pre-coated with polyornithine (PO; 15  $\mu$ g/ml), laminin (Lam; 1  $\mu$ g/ml) and fibronectin (FN; 2  $\mu$ g/ml) in N2 medium supplemented with BDNF (brain-derived neurotrophic factor, 20 ng/ml, R&D), ascorbic

acid (0.2 mM, Sigma), Purmorphamine (1 mM, Stemgent) and FGF8 (100 mg/ml, R&D). They were patterned at P1 stage for two weeks and thereafter passaged by mechanical picking of the CNS clusters and re-plated on PO/Lam/FN coated dishes. Neural precursor cells (NPCs) were maintained in N2 medium supplemented with EGF (20 ng/ml), bFGF (20 ng/ml, R&D Systems) and B-27 supplement without vitamin A (1:50, Invitrogen). Medium was changed every 2 days while the cultures were passaged every two weeks. For the differentiation to astrocytes, NPCs (day 65-135) were exposed to N2 medium containing 5% FBS for an additional 14 days. For the differentiation to neurons, NPCs were cultured in N2 medium supplemented with BDNF (20 ng/ml) and ascorbic acid (AA, 0.2 mM) for 14 days. For the differentiation to oligodendrocytes, NPCs were cultured in N2 media supplemented with cAMP, triiodothyronine (T3), BDNF (20 ng/ml) and ascorbic acid (AA, 0.2 mM) for 21 days.

### **Immunostaining**

Cells were fixed by incubation in 4% paraformaldehyde for 15 minutes and incubated in blocking buffer (10% fetal bovine serum or goat serum; 0.1% BSA; 0.3% Triton-X100 in PBS) for 1 hour. Cells were stained with primary (or conjugated) antibodies in blocking buffer at 4°C overnight, washed and stained with secondary antibodies in PBS supplemented with 0.1% BSA for 30 minutes at room temperature, in the dark. Nestin (MAB5326; 1:400), SOX2 (AB5603; 1:200), TRA-1-81 (MAB4381; 1:100), Olig2 (AB9610; 1:100), O4 (MAB345; 1:50) and MBP (MAB386; 1:1000) antibodies were obtained from Millipore, H3K27me3 (clone C36B11; 1:1500) and phospho-Histone H2A.X (Ser139; clone 20E3; 1:400) from Cell signaling, Tuj1 (PRB-435P; 1:500) from Covance, GFAP (1:5000) and Ki67 (clone MIB-1; 1:200) from Dako, Nanog (H-155; 1:200) from Santa Cruz, p75 (clone ME20.4; 1:50) from Advanced Targeting Systems. Nuclei were stained by DAPI (Invitrogen). Mice were perfused with 4% paraformaldehyde solution. The brains were extracted and fixed by incubation in 4% paraformaldehyde at 4°C overnight. Following cryopreservation by incubation in 15% and 30% sucrose solutions, brains were frozen into OCT compound and cut by cryostat into 10 mm sections. For immunohistochemistry, sections were air-dried, washed by PBS and incubated in blocking buffer (10% fetal bovine serum or goat serum, 0.1% BSA and 0.3% Triton-X100 in PBS) for 1 hour. Cells were stained with primary antibodies in



blocking buffer at 4°C overnight, washed and stained with secondary antibodies in PBS supplemented with 0.1% BSA for 30 minutes at room temperature, in the dark, followed by nuclear staining by DAPI. Human specific GFAP antibody (STEM123; 1:1000) was obtained from StemCells Inc, HA-tag (clone 3F10; 1:200) from Roche, Ki67 (ab15580; 1:200) from Abcam, and human nuclear antigen (MAB1281; 1:200) from Millipore. Whole brain images are composed by stitching ~20 scan images. TUNEL assay was performed using TUNEL apoptosis detection kit from Millipore following manufacturer's instruction. Hematoxylin and Eosin (H&E) staining was performed according to standard procedures.

### **Gamma-radiation of cells**

Cells were plated onto 48-well plates and irradiated at the dose of 5 Gy (3.45 Gy/minute) using X-RAD 225C Biological X-ray irradiator (Precision X-ray, Inc). Following incubation for the indicated time period, cells were fixed and immunostained for Ki67 and g-H2A.X (phosphorylated at Ser139). The number of Ki67-positive cells and g-H2A.X foci per cell was counted manually or using ImageJ software.

### **Sub-G1 assay**

Cells were trypsinized, collected in PBS and fixed in cold 70% ethanol. Followed by RNase A (Ambion) treatment, cells were stained with propidium iodide (50 µg/ml, Invitrogen) in PBS and subjected to FACS analysis according to standard procedures.

### **Migration and invasion assay**

Cell migration was assessed by the Boyden chamber assay. Briefly, the bottom chamber was coated with Lam/FN at 37°C overnight and air-dried. 3,000 cells were plated on the top chamber and allowed to migrate for 4 hours. Following PBS wash, cells that migrated to the bottom chamber were fixed, stained with DAPI and counted by fluorescence microscopy. For invasion assay, spheres of RFP-labeled transduced NPCs (~1.5 mm in diameter) were embedded in Matrigel (BD). Following 12 days of incubation, invasion of cells into Matrigel was analyzed by measuring the distance travelled from the sphere edge. P-values were calculated by Chi-square test.

### **Low density culture**

3,000 cells were evenly plated onto 24 well plates precoated with PO/Lam/FN and cultured in N2 medium supplemented with EGF (20 ng/ml), bFGF (20 ng/ml, R&D

Systems) and B-27 supplement without vitamin A (1:50, Invitrogen) for 4 weeks. Medium was changed every 2-3 days. Crystal violet staining was performed according to standard procedures.

#### **In vitro limiting dilution assay**

Sphere-forming capacity was assessed by limiting dilution assay. 10~100 cells were plated into 96-well low-attachment plates. Following 12 days of incubation, spheres with more than 5 cells were counted. P-values were calculated using Extreme Limiting Dilution Analysis (ELDA) software(22).

#### **Animal surgery and transplantation**

All animal experiments were done in accordance with protocols approved by our Institutional Animal Care and Use Committee and following NIH guidelines for animal welfare. 100,000 or 500,000 cells were injected intracranially into NOD-SCID mice (6-day-old pups, 3 mm posterior to lambda-suture and 3 mm deep). Hypothermia was used for anesthesia. Animals were monitored for 3-6 months with neurological assessments and MRI imaging. For evaluating *in vivo* growth of menin-knockdown cells, Luciferase-labeled P5K cells were transduced with control or sh-MEN1-expressing lentivirus. Following 6 days of incubation, cells were dissociated by Accutase and intracranially injected into immunocompromised mice as described above.

#### **In vivo imaging**

Animals were anesthetized with isoflurane gas and injected with D-luciferin (Invitrogen; Pierce), followed by bioluminescent imaging by the IVIS imaging system (PerkinElmer) with a 5-minute exposure time (described in detail in (23)). For MRI imaging, the mice were anesthetized using 1.5–2 % isoflurane in a 70% N<sub>2</sub>O + 30% O<sub>2</sub> mixture. Imaging was performed on a Bruker Biospec 4.7-Tesla (200 MHz) 40 cm horizontal bore magnet. The system is equipped with a 300 mT/m gradient system. Examinations were conducted using a 32-mm quadrature birdcage resonator for excitation and detection.

#### **Drug screening**

We performed a chemical screen using a limited small molecule library of compounds that target epigenetic regulators (80 compounds; Cayman Chemicals) along with DNA damage reagents (Camptothecin and Doxorubicin, Santa Cruz) and RTK inhibitors (Sunitinib and Imatinib, Selleck) as controls. GFP-labeled normal NPCs and RFP-labeled

P5K cells were mixed and seeded onto 96-well plates pre-coated with PO/Lam/FN. 24 hours after plating, cells were then treated with each compound at 8 different concentrations (2-fold serial dilution, typically from 10 mM to 78.125 nM) in duplicate wells for 6 days. Following PBS wash, GFP and RFP fluorescence was quantified by a multi-wavelength automated plate reader (Tecan Infinite M1000 Pro). For calculating IC<sub>50</sub> values, data were normalized by the values of vehicle-treated cells and fitted to Hill equation using the least squares method.

### **Microarray analysis**

Total RNA was extracted with Trizol reagent (Invitrogen). The RNA was then processed by the MSKCC Genomic core facility and hybridized with Affymetrix U133 Plus2.0 arrays. Gene expression analysis was carried out within the GenePattern website (<http://www.broadinstitute.org/cancer/software/genepattern/>). Briefly, background correction and quantile normalization was done with the Robust Multi-array Average (RMA) algorithm(24). Probes that passed the variation filter were subjected to PCA and hierarchical clustering with average linkage and Pearson correlation distance. For identifying differentially expressed genes between conditions, probes were ranked by signal-to-noise ratio and statistical significance was determined by permutation test (Supplementary table 1 and 2). Microarray data of DIPG patients' samples was obtained from GSE34824/GSE36245 and early-stage NPCs was from GSE9921. Microarray data generated in this manuscript was deposited in GEO (GSE55541).

### **ChIP-seq**

Native ChIP was performed as previously described(25). Briefly, ~10 million cells were washed, resuspended in digestion buffer (50 mM Tris-HCl, pH 7.6; 1 mM CaCl<sub>2</sub>; 0.2% Triton-X100) and treated with micrococcal nuclease from *Staphylococcus aureus* (MNase) for 5 min at 37°C. Nuclei were lysed by brief sonication and dialyzed into RIPA buffer (10 mM Tris-HCl, pH 7.6; 1 mM EDTA; 0.1% SDS; 0.1% Na-Deoxycholate; 1% Triton X-100) for 2 hours at 4°C. Soluble material was recovered and subjected to immunoprecipitation using antibody against H3K4me3 (Active Motif; Cell signaling) or H3K27me3 (Millipore; Cell signaling), and Dynabeads Protein A (Invitrogen). Following the final wash, chromatin was eluted with elution buffer (50 mM Tris-HCl, pH 8.0; 10 mM EDTA; 1% SDS) and digested by proteinase K (Roche). ChIP DNA and ChIP input

DNA were then isolated using QIAGEN Qiaquick PCR purification kit. ChIP-seq libraries were prepared according to the Illumina protocol and sequenced with either the Genome analyzer II or HiSeq 2000.

### **Data analysis**

Analysis of ChIP-seq data was carried out within the Galaxy website (<http://galaxyproject.org/>). Briefly, reads that passed the quality filter were mapped to the human genome (hg19) using Bowtie algorithm (26) with default setting. Peak calling was done by Model-based Analysis of ChIP-Seq (MACS) algorithm (27) with 500-bp window size. For comparing the level of histone modifications in different groups of promoters, the total number of reads in individual promoters (between +1 kb and -500 bp from transcription start site) was computed and normalized by total read counts. The level at gene-body regions was further normalized by the length of individual transcripts.

### **Western Blot**

Cells were lysed in RIPA Buffer (50mM Tris-HCl, pH 8.0; 120mM NaCl; 5mM EDTA; 0.5% NP-40). Following 30-minute centrifuge at 14000 rpm, supernatant was collected and protein concentration was measured by the Bradford Assay (Bio-Rad). Lysates were boiled for 5 minutes in Laemmli sample buffer and separated by electrophoresis on 4-12% Bis-Tris gel in SDS running buffer for 1.5-2 hours. Protein was transferred to nitrocellulose membrane using the iBlot gel transfer device (Invitrogen). Non-specific protein binding was prevented by blocking the membrane with 4% blocking reagent (Amersham) in TBS-T (0.1% Tween-20 in TBS buffer). Membrane was incubated at 4°C overnight in the blocking buffer with primary antibodies: PDGFRA (1:1000; Cell Signaling), Trimethylated-H3K27 (1:1000; Cell Signaling), b-tubulin (clone DM1A; 1:1000; SantaCruz), GAPDH (1:1000; Cell Signaling), HA-tag (clone 3F10; 1:1000; Roche), H3 (clone 96C10; 1:1000; Cell Signaling), Menin (1:1000; Bethyl Laboratories) and H3.3K27M (1:1000; Millipore). After four washes with TBS-T, the blot was incubated with respective secondary antibodies for Mouse (1:5000) or Rabbit (1:5000) at room temperature for 30 minutes. ECL prime Western Blotting Detection Kit was used for detection according to manufacturer's instruction (Amersham).

### **Quantitative real-time PCR**

Total RNA was extracted using TRIzol (Invitrogen). For each sample, 1 mg of total RNA was reverse transcribed using the SuperScriptIII (Invitrogen). Amplified material was detected using Quantitect SYBR green probes and PCR kit (Qiagen) on a Mastercycler RealPlex2 (Eppendorf). All results were normalized to an Actin control. Sequences of primers are shown in supplementary table.

### **Vectors and mutagenesis**

Human PDGFRA (Addgene #23892)(28) was cloned into pLenti PGK Neo DEST vector (Addgene #19067)(29). Mutagenesis was performed following the manufacturer's protocol (Promega). Cloning and mutagenesis of H3.3 transgenes were described previously(9) . Luciferase-expressing vector (pLenti PGK Blast V5-LUC) was obtained from Addgene (#19166)(29), MEN1-expressing vector from Open Biosystems. For the construction of shRNA-expressing vectors, annealed oligos were cloned into H1 vector or pENTR-H1 vector. The shRNA expressing cassette in pENTR-H1 vector was transferred to lentiviral vectors by LR recombination according to manufacturer's instruction (Invitrogen). Target sequences of each shRNA are shown in supplementary table.

### **Lentivirus production**

Lentiviruses were produced in 293T packaging cells, by a slightly modified version of a method described previously(30) . Lentiviral vectors were transfected in 293T cells with packaging vectors (pCMV-dR8.2 and pCMV-VSV-G), in the presence of Polyethylenimine (Polysciences). Viral supernatants were collected 72 h after transfection and viral particles were concentrated by ultracentrifugation at 49,000g for 1.5 h at 4 °C.

### **Assessment of Senescence**

Senescence-associated b-galactosidase activity was assessed using the staining kit from Invitrogen according to the manufacturer's instructions.

### **Statistical analysis**

Student's t-test and ANOVA were performed for statistical analysis, unless indicated otherwise.

**Figure S1**

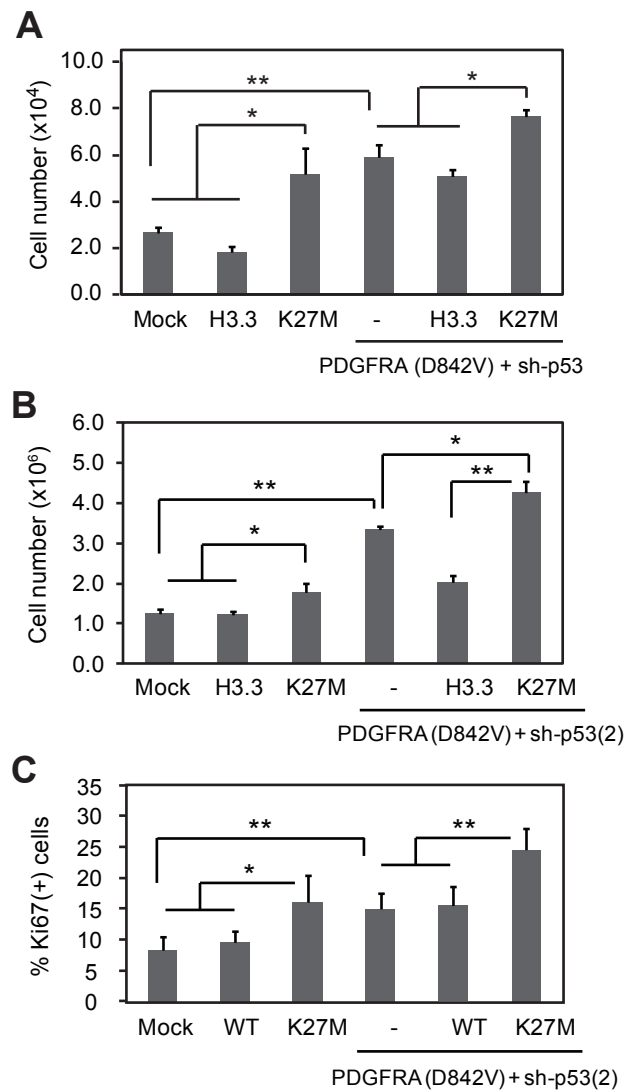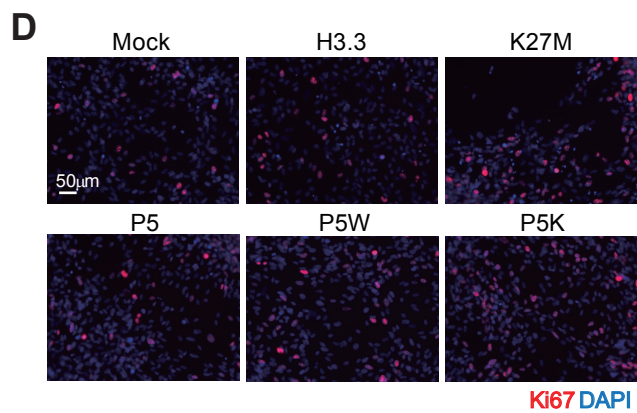

**Fig. S1.**

(A,B) Quantification of cell viability (trypan blue) following incubation for 5 days *in vitro*. A second shRNA against p53 was used in B, leading to a similar results. (C) Quantification of proliferation via Ki67 upon transduction of oncogenes combinations and using the second shRNA-p53. (D) Immunohistochemistry for Ki67 in the different cell groups. Bars indicate mean  $\pm$  S.D. ( $n = 4\sim 5$ ). \*,  $p < 0.05$ ; \*\*,  $p < 0.01$ .

Figure S2

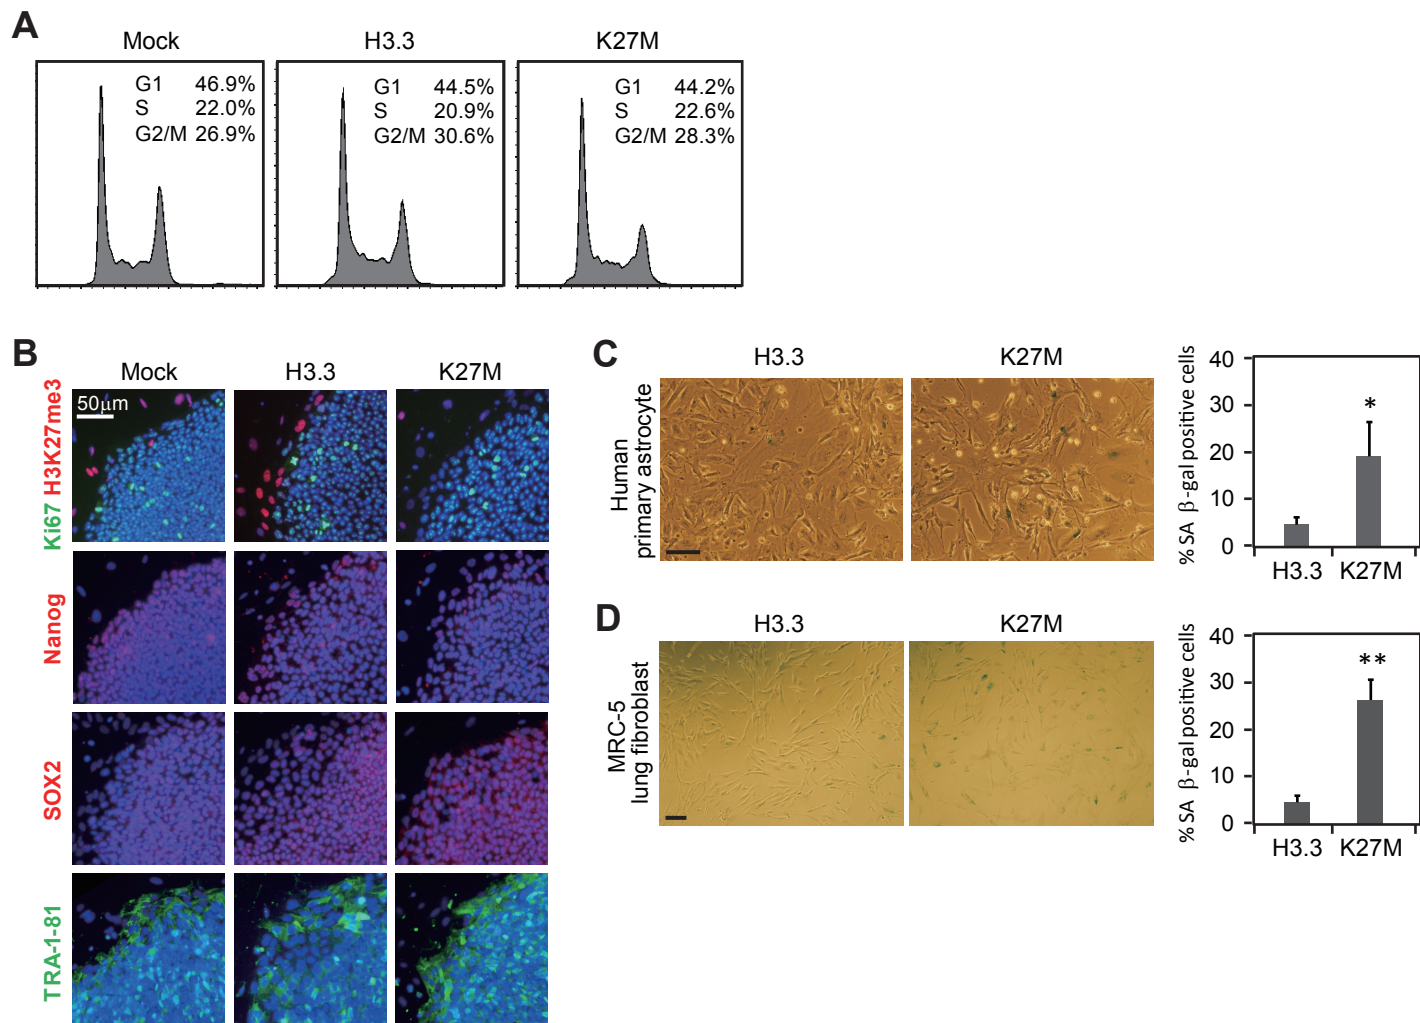



**Fig. S2**

(A) FACS-based cell cycle analysis of human ES cells transduced with WT or K27M mutant form of histone H3.3. (B) Human ES cells expressing WT histone H3.3 or K27M mutant were immunostained with the indicated antibodies, demonstrating absence of H3K27me3 marks, and unchanged expression of pluripotency markers Nanog and TRA1-81 as well as the early transcription factor SOX2. Sporadic expression of H3K27me3 is likely localized to the feeder layer. (C,D) Expression of K27M is associated with a decrease in proliferation and increased senescence in differentiated cells, such as astrocytes (C) and fibroblasts (D). Quantification of senescent cells was performed via analysis of senescence-associated  $\beta$ -galactosidase activity (SA  $\beta$ -gal). Bars indicate mean  $\pm$  S.D. ( $n = 4\sim 5$ ). Scales: 100  $\mu$ m. \*,  $p < 0.05$ ; \*\*,  $p < 0.01$ .

Figure S3

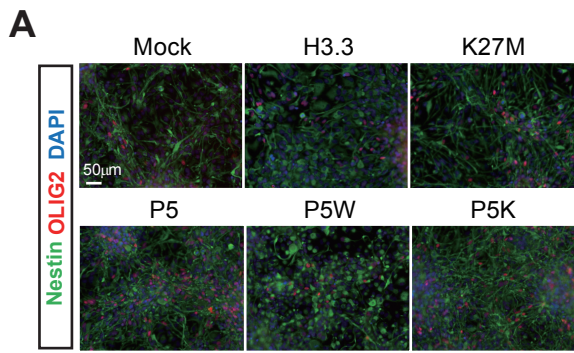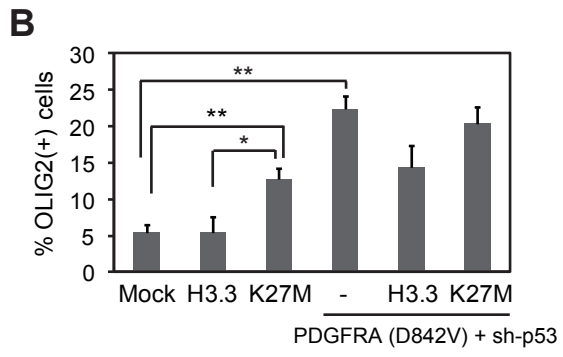

**Fig. S3**

(A) NPCs transduced with the indicated lentiviruses were immunostained for Nestin and Olig2. (B) Quantification of immunostaining for Olig2. Bars indicate mean  $\pm$  S.D. ( $n = 4\sim 5$ ). \*,  $p < 0.05$ ; \*\*,  $p < 0.01$ .

**Figure S4**

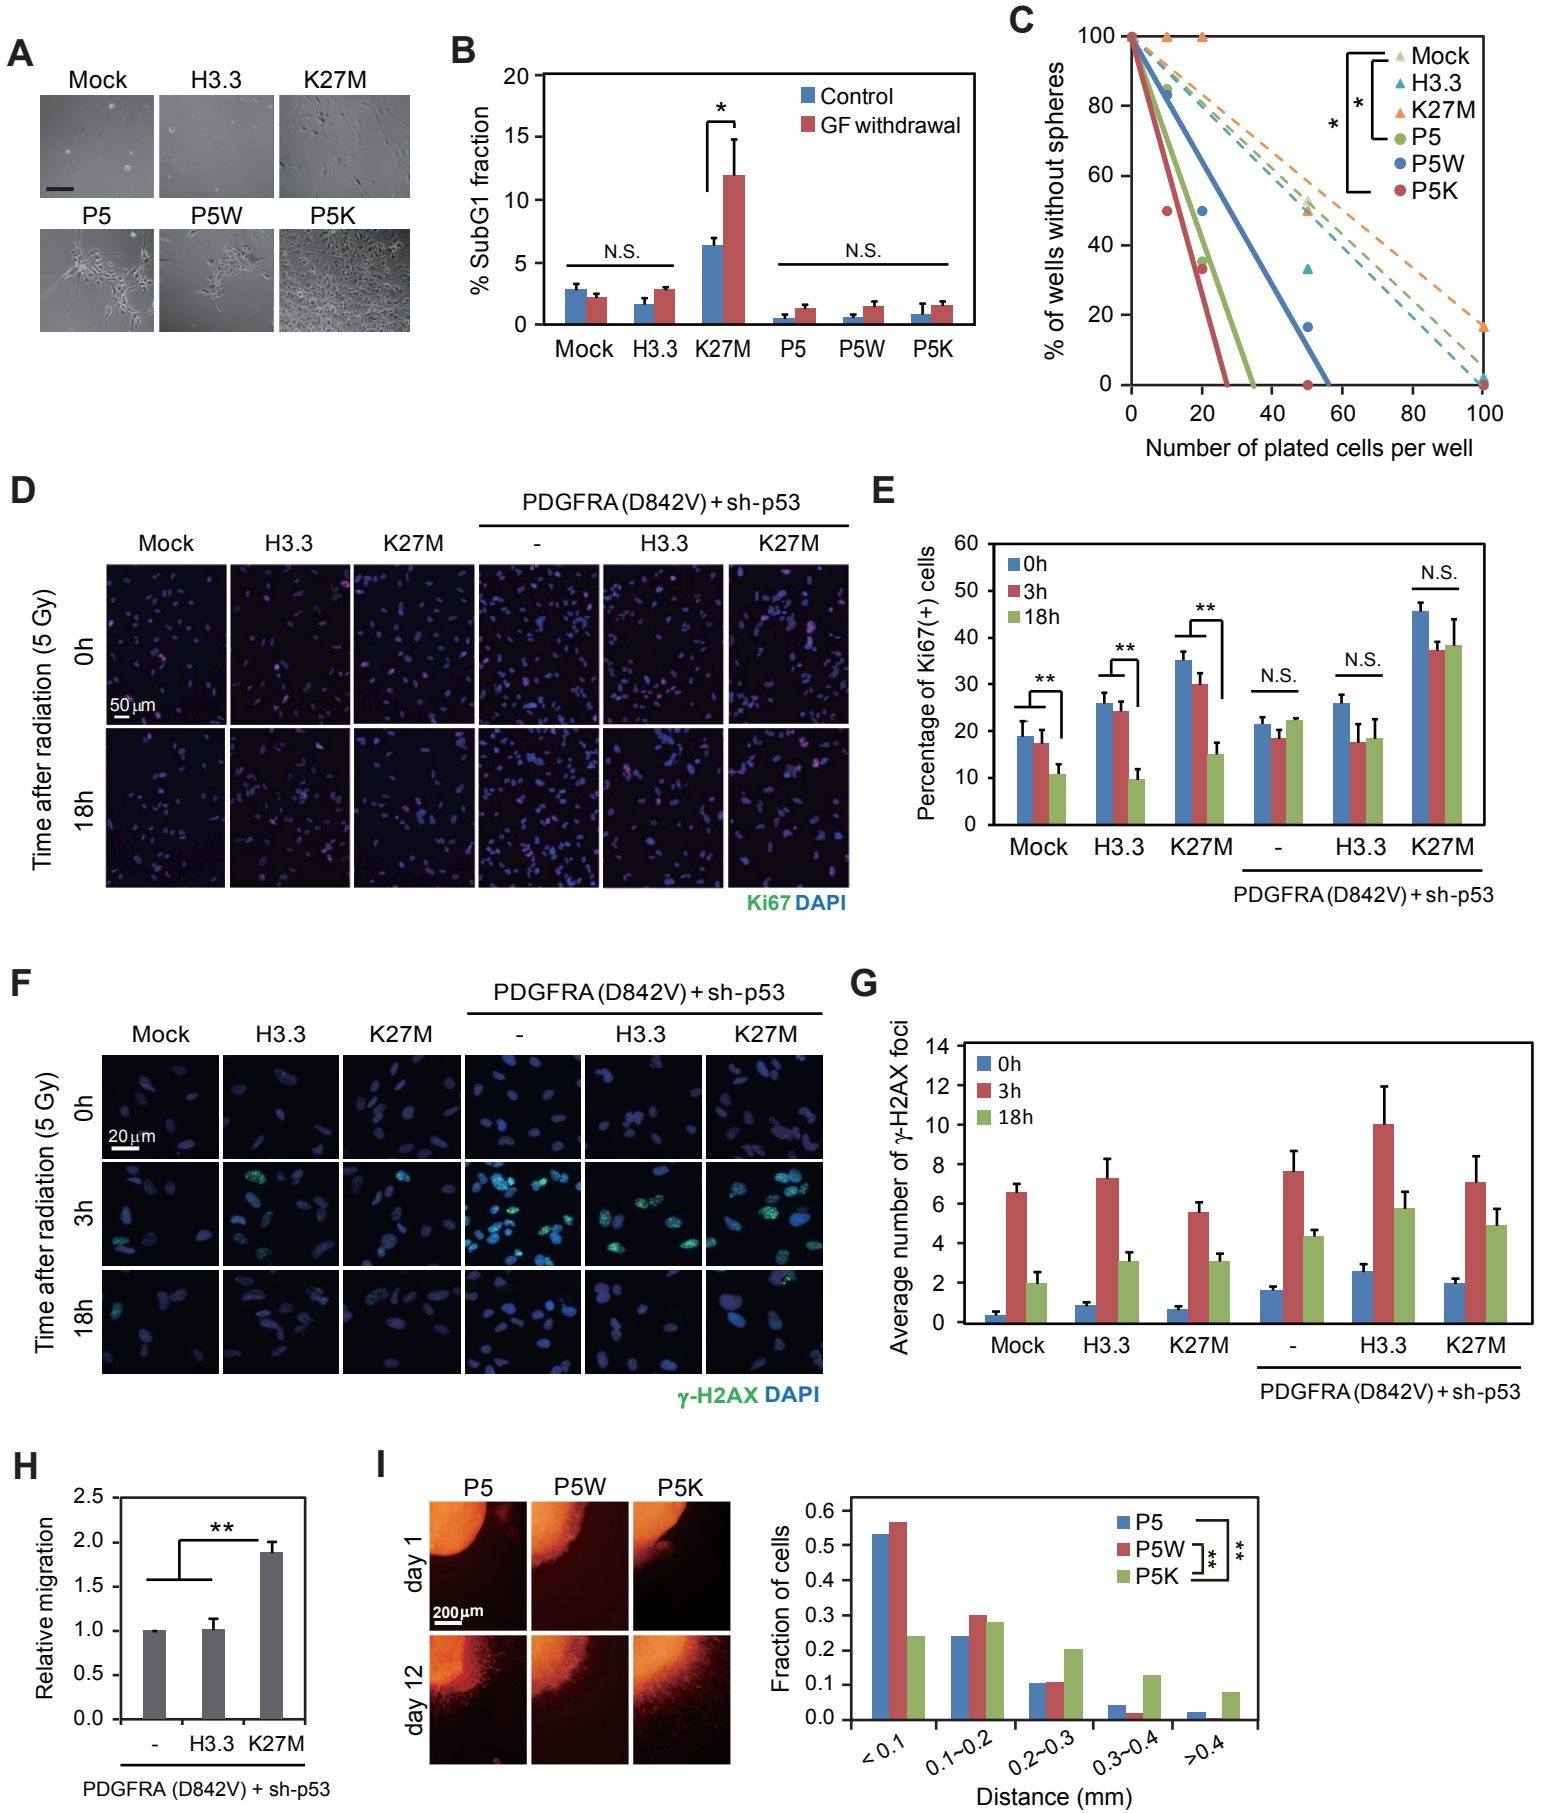

#### Fig. S4

(A) Bright phase microscopy of transduced NPCs grown at very low density for 4 weeks. (B) FACS analysis for the sub-G1 fraction (apoptotic cells) in transduced NPCs under control conditions and 24 hours following growth factor withdrawal. Bars indicate mean  $\pm$  S.D. ( $n = 3$ ). (C) Sphere-forming capacity was assessed by limiting dilution assay. 10~100 cells were plated into a 96-well low-attachment plate. After 12 days of incubation, spheres with more than 5 cells were counted. (D,E) Proliferation of normal and transformed NPCs was assessed following a single dose of radiation (5 Gy) at the indicated time point, by Ki67 staining. Bars in (E) indicate mean  $\pm$  S.D. ( $n = 4\sim 5$ ). (F,G) DNA repair kinetics following radiation. Cells were immunostained for phospho- $\gamma$ -H2A.X at 0, 3 hours and 18 hours following a dose of 5 Gy. The number of positive foci was counted. (H) Cell migration was assessed by the Boyden chamber assay. 3,000 cells were plated in the top chamber and the number of cells that migrated to the bottom chamber was counted by fluorescence microscopy of DAPI stained cells. Bars indicate mean  $\pm$  S.D. ( $n = 4$ ). (I) Low magnification immunofluorescence microscopy of RFP-labeled transduced NPCs embedded as spheres in Matrigel. Cells migrating from the spheres were analyzed on day 12 and the distance travelled from the sphere edge was measured. \*,  $p < 0.05$ ; \*\*,  $p < 0.01$ . NS, Not Significant.

**Figure S5**

**A**

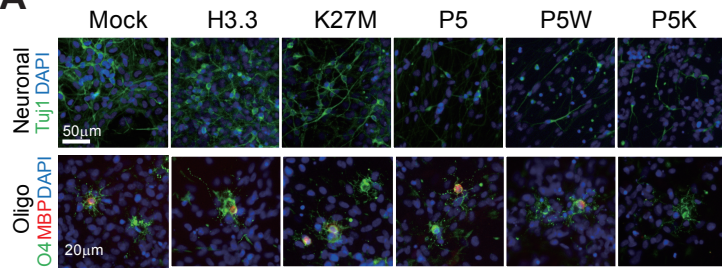

**B**

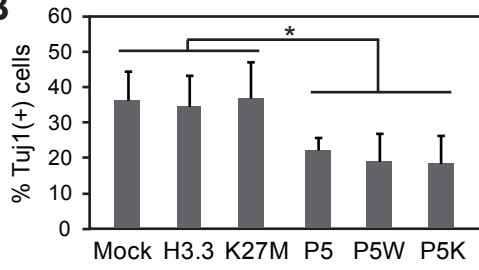

**C**

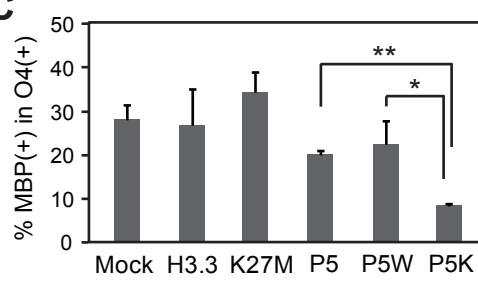

**D**

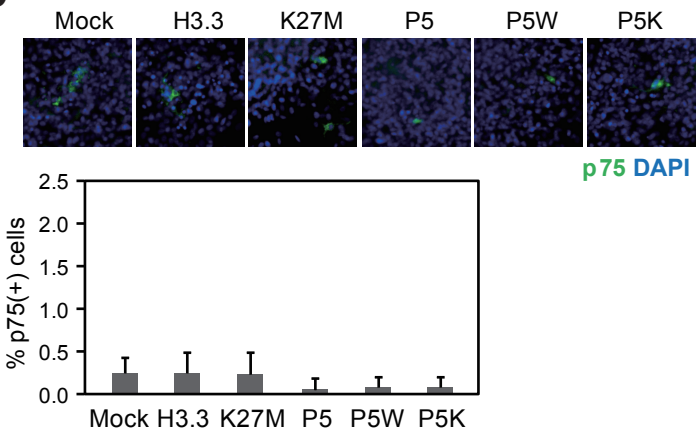

**Fig. S. 5**

(A-C) Transduced NPCs were differentiated under neuronal and oligodendrocyte (oligo) conditions. Immunohistochemistry and quantification for the neuronal (TUJ1, B) and oligodendrocyte (O4 and MBP, C) markers, respectively. Bars indicate mean  $\pm$  S.D. ( $n = 4\sim 5$ ). (D) Spontaneous differentiation to mesenchymal cells was analyzed by p75 immunostaining. \*,  $p < 0.05$ ; \*\*,  $p < 0.01$ .

Figure S6

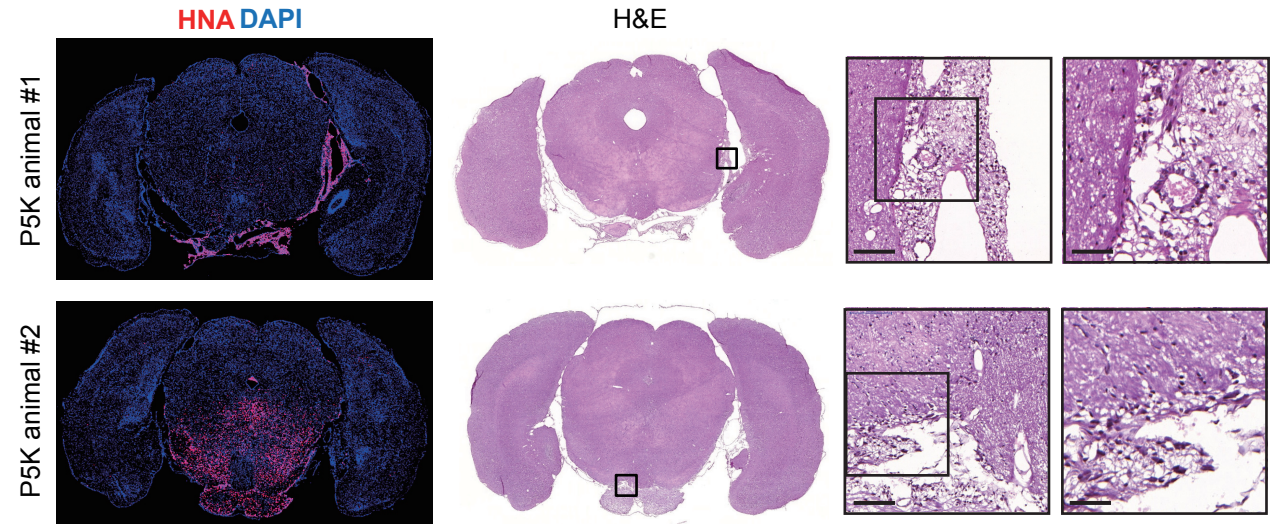



**Fig. S6**

Representative images of mouse brains transplanted with P5K cells. Low magnification immunofluorescence images of representative sections labeled for human specific nuclear antigen (HNA) and counter-stained with DAPI (left). The consecutive sections were stained with H&E (right). Scale bar, 100  $\mu\text{m}$  (left), 50  $\mu\text{m}$  (right). Note the presence of hydrocephalus secondary to subarachnoidal disease, as well as intraventricular tumor (animal #2).

Figure S7

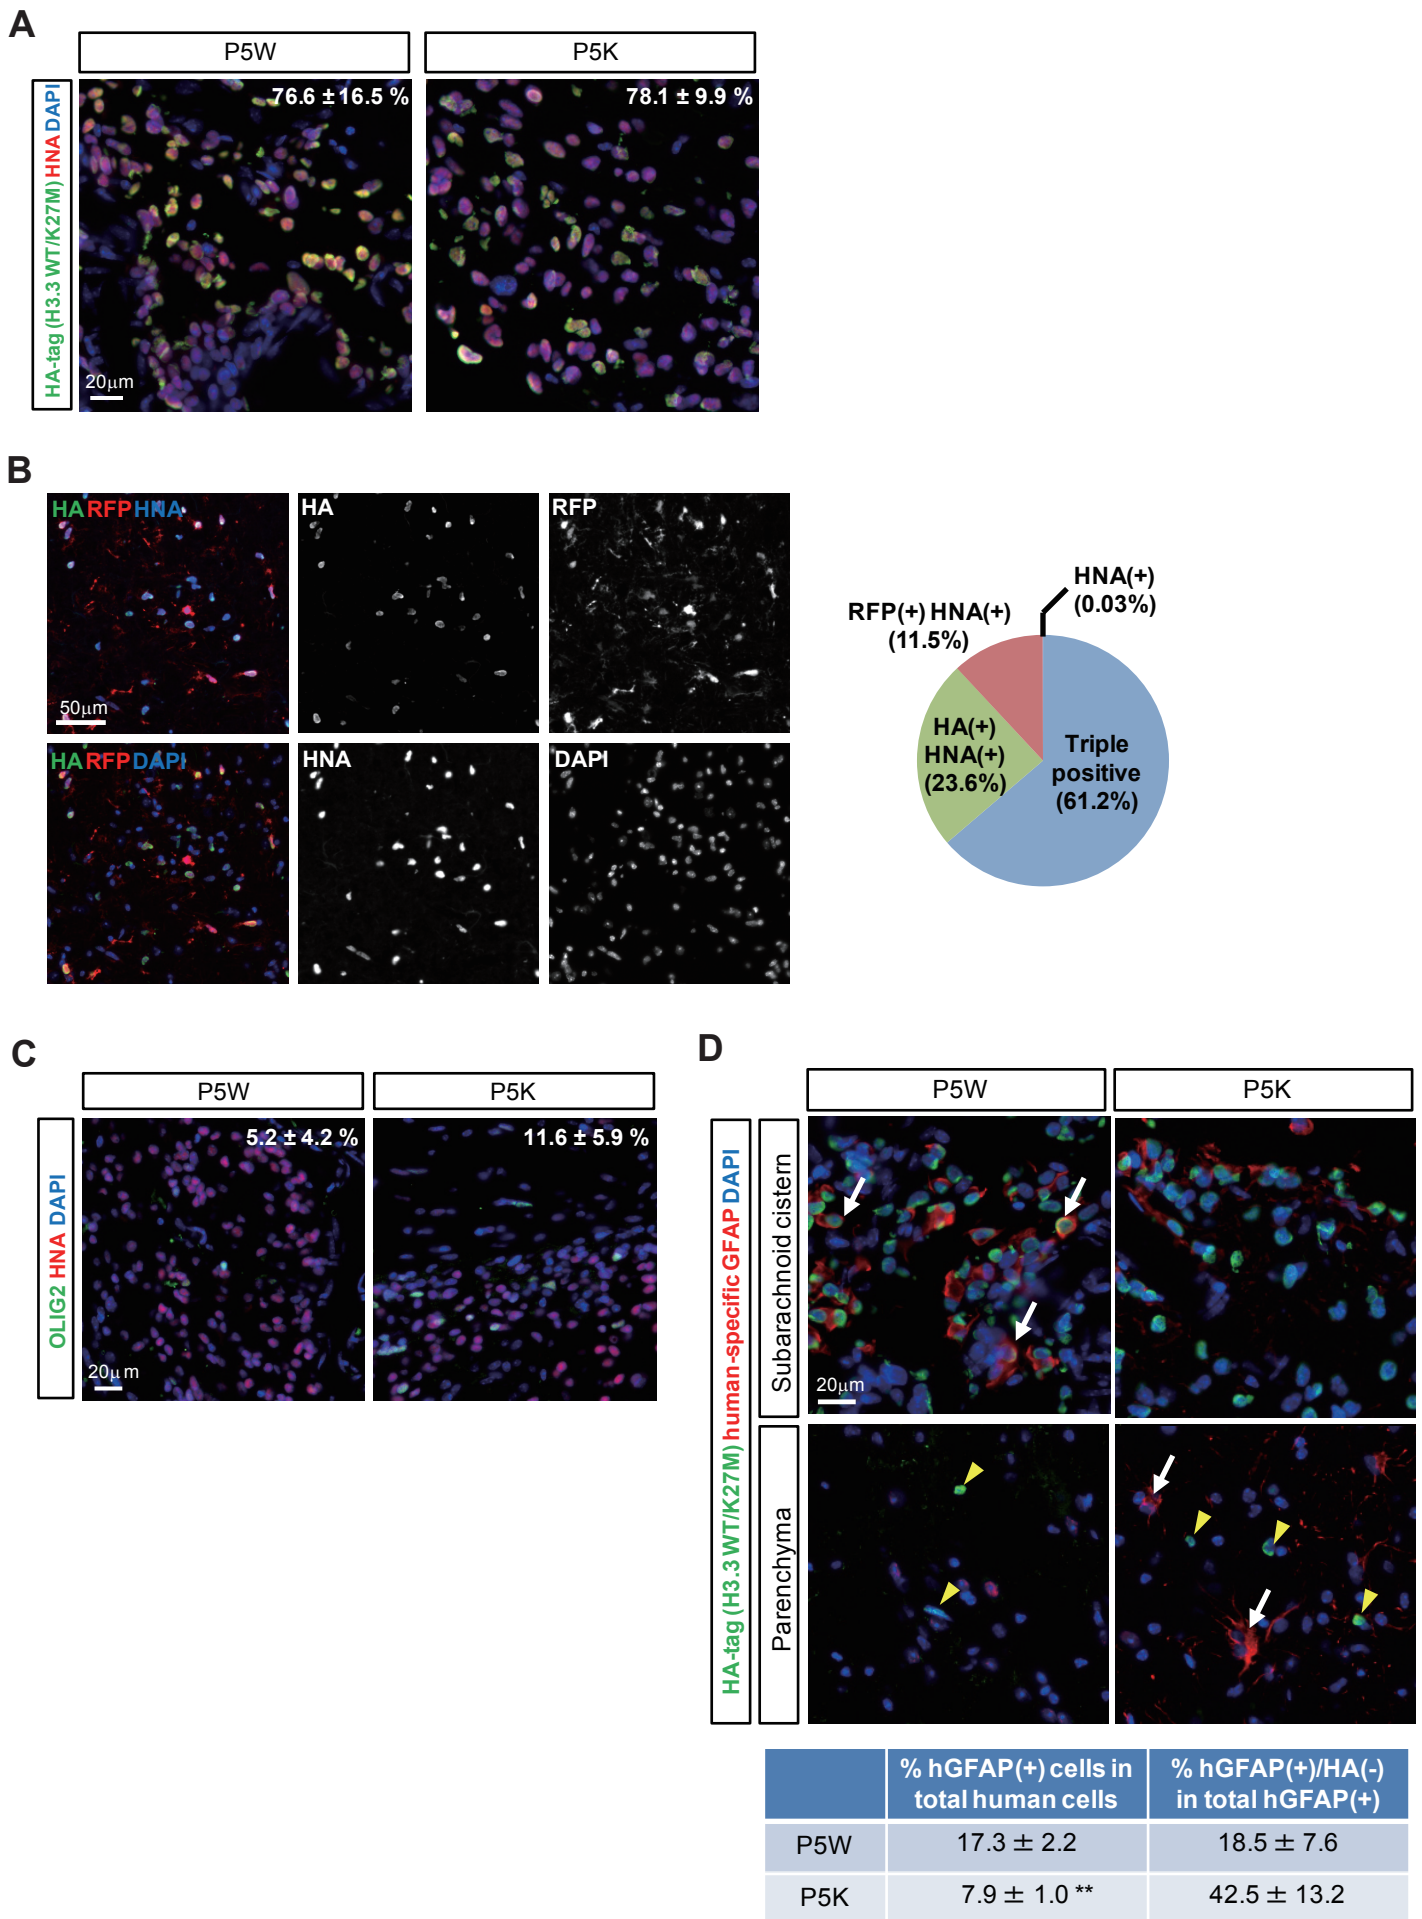

### Fig. S7

Immunophenotyping of transplanted cells. (A-D) Frozen sections of mouse brains transplanted with P5W or P5K cells were immunostained for the indicated antibodies. Expression of H3.3 WT or K27M was coupled to hemagglutinin (HA) epitope tag, while sh-p53 was associated with a RFP reporter. (A) Immunostaining for the HA-tag showed that the majority of the cells retained the histone transgenes. Numbers indicate the percentage of HA-stained cells relative to HNA-stained cells (mean  $\pm$  S.E.M.,  $n = 3\sim 4$ ). (B) Silencing of the histone transgene and/or sh-p53 expression in transplanted P5K cells was evaluated by immunostaining for the HA-tag and RFP expression, respectively. (C) Immunohistochemistry for Olig2 demonstrates an increased percentage in the P5K tumors, compared to P5W. Numbers indicate the percentage of Olig2-stained cells relative to HNA-stained cells (mean  $\pm$  S.E.M.,  $n = 3\sim 4$ ). (D) Astrocytic differentiation of transplanted cells was assessed by immunostaining for human-specific GFAP and the HA-tag. White arrows indicate astrocytes of human origin. Yellow arrowheads indicate transplanted cells that retain histone transgenes. Numbers indicate the percentage of GFAP-stained cells relative to the total number of cells of human origin (HA and/or GFAP-stained cells, mean  $\pm$  S.E.M.,  $n = 4\sim 6$ ). \*\*,  $p < 0.01$ .

Figure S8

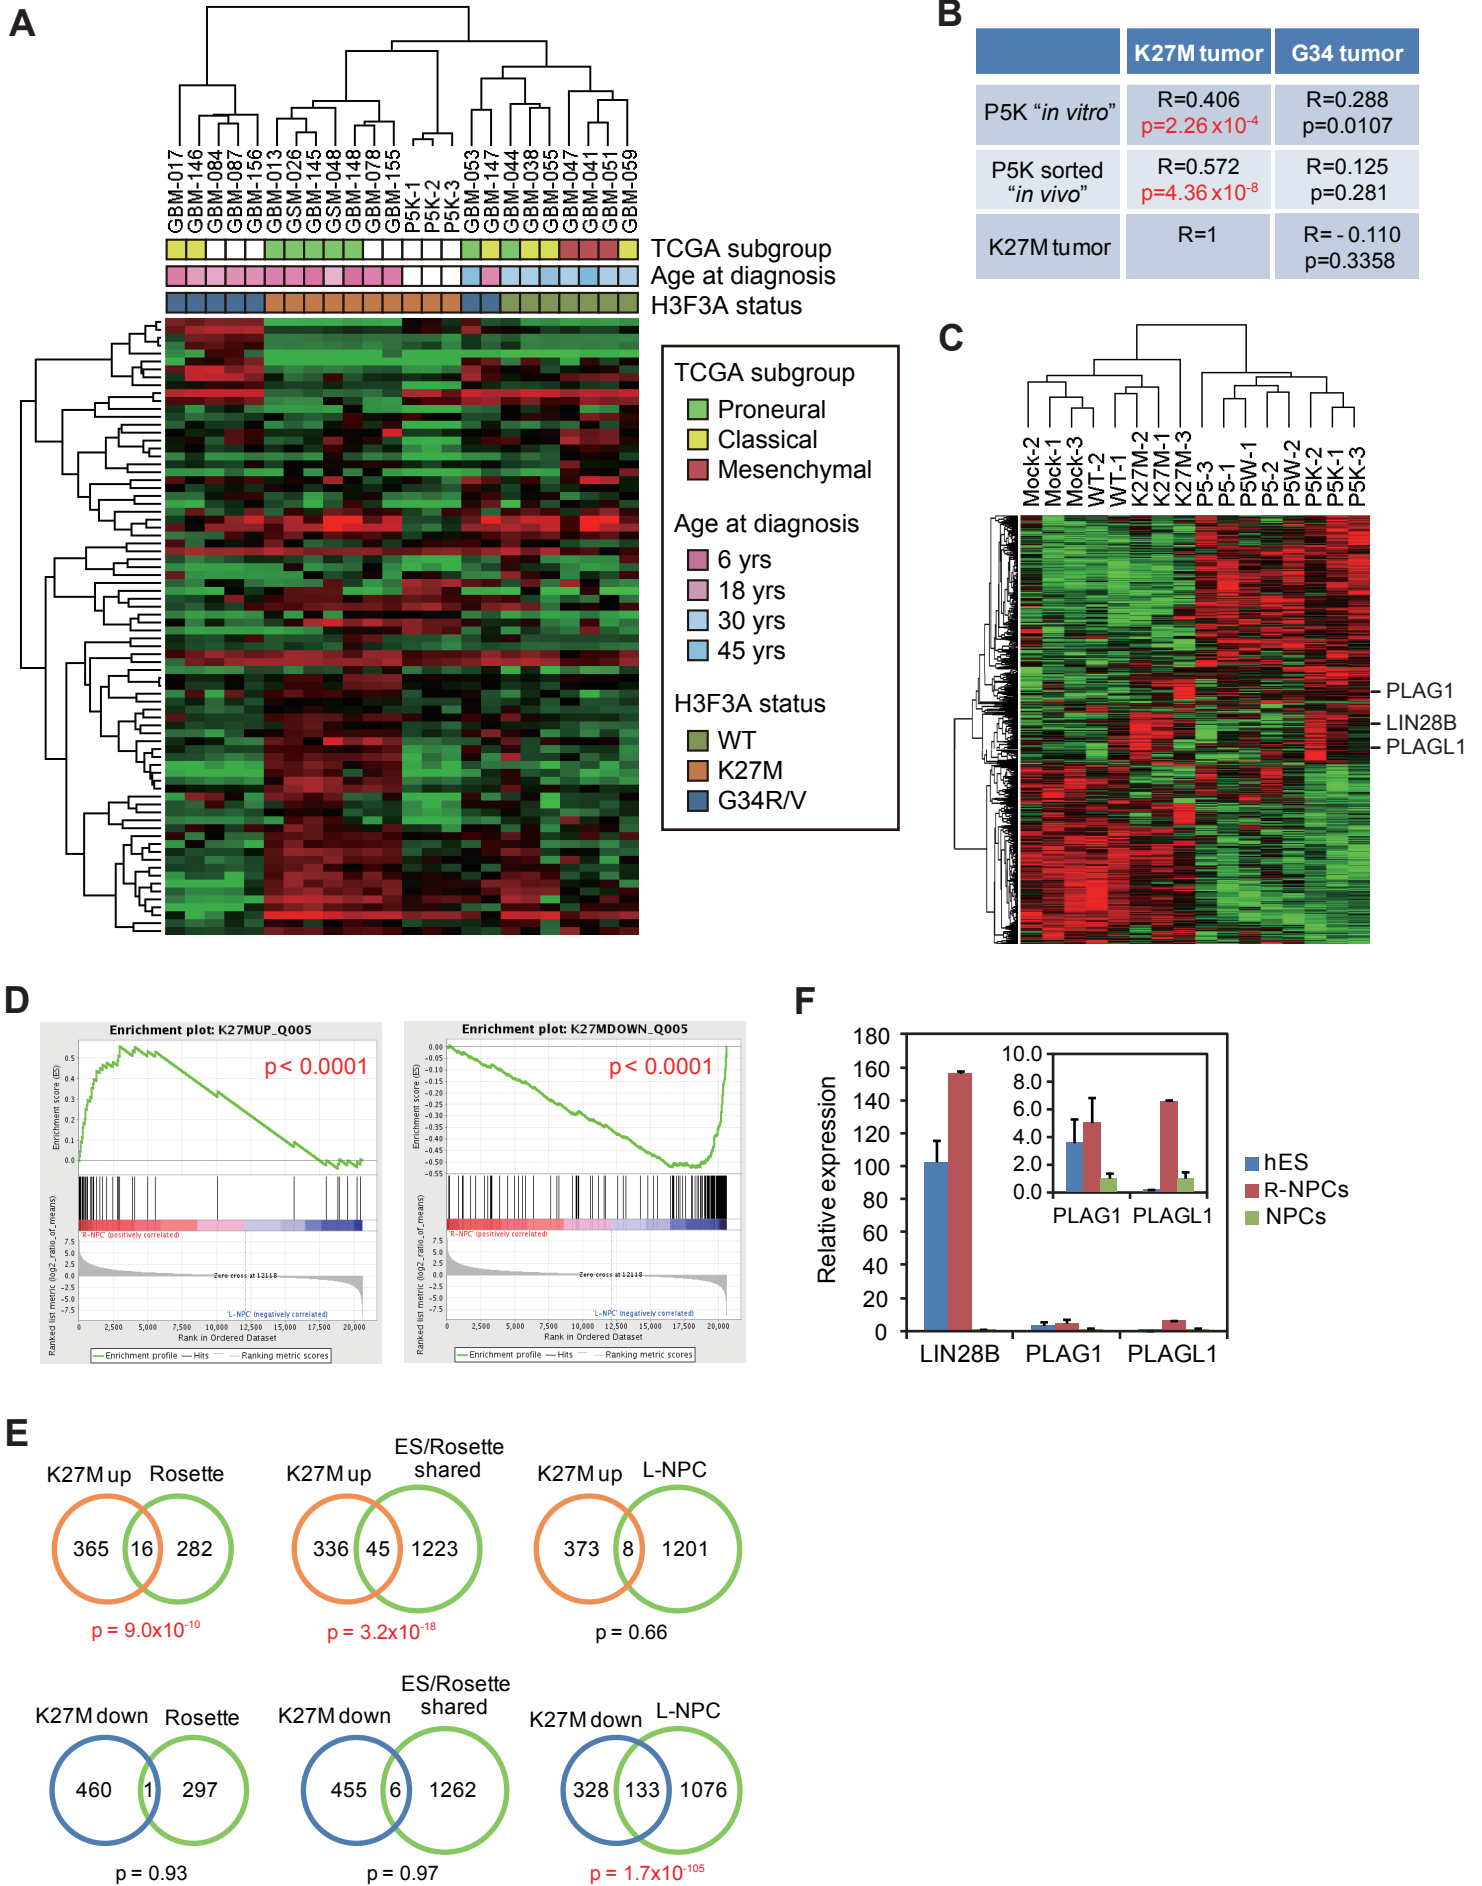

**Fig. S8**

(A) Hierarchical clustering of microarray data from P5K cells and patient tumor samples bearing the K27M or G34R/V mutations (GSE36245) obtained from (4). (B) Pearson's correlation between the two groups was analyzed. (C) Unsupervised hierarchical clustering of microarray data obtained from NPCs transduced with the different H3.3 and oncogene combinations. (D) Gene Set Enrichment Analysis (GSEA) indicates an enrichment of the gene sets that are up or down-regulated by K27M in the expression profile of early-stage (rosette-stage) NPCs compared with late-stage NPCs. (E) Overlap of indicated transcript sets are shown by Venn diagrams. Transcripts that are up or down-regulated for more than 3 folds by K27M ('K27M up' and 'K27M down') were compared with the transcripts that are upregulated in early-stage NPCs ('Rosette'), late-stage NPCs ('Late-NPCs') or shared between early-stage NPCs and undifferentiated ES cells ('ES/Rosette shared'), respectively. P-values were calculated by hyper-geometric test. (F) RT-qPCR demonstrates increased expression levels of LIN28B, PLAG1 and PLAGL1 in human ES cells and rosette-stage NPCs. Bars indicate mean  $\pm$  S.E.M. ( $n = 3\sim 4$ ).

Figure S9

A

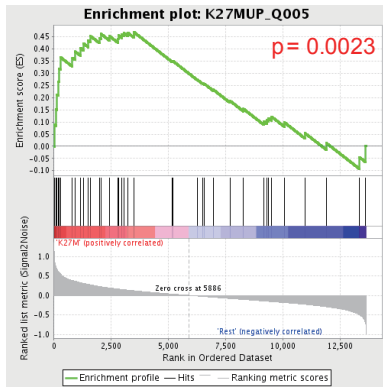

B

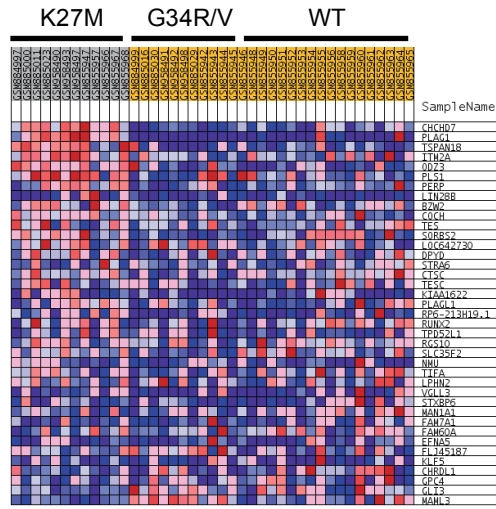

**Fig. S9**

(A,B) Gene Set Enrichment Analysis (GSEA) indicates an enrichment of the gene set that is upregulated by K27M in the gene expression profile of patient tumor samples with K27M mutation, compared to G34R/V mutations, and non-histone mutated GBMs.

Figure S10

A

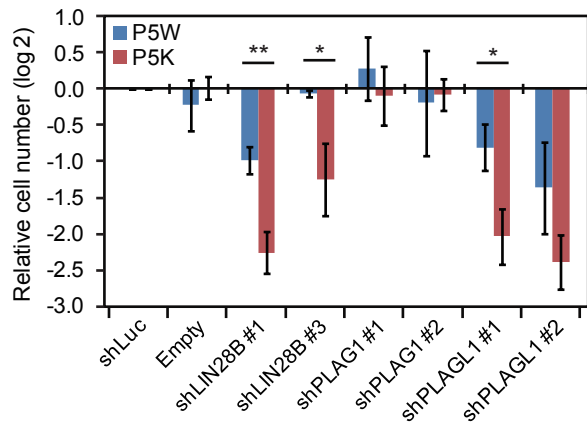

B

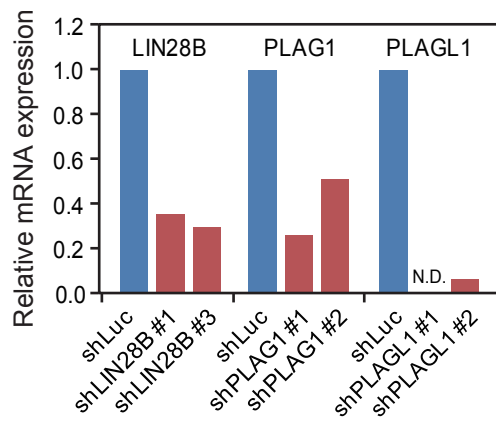

C

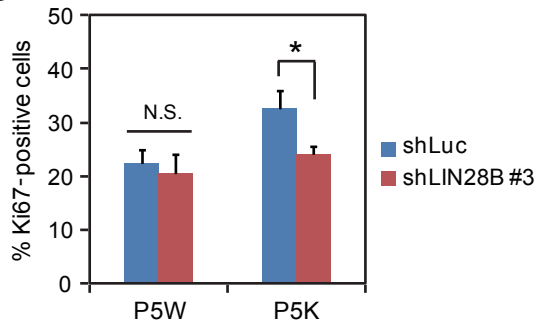



## Fig S10

(A) Knockdown of LIN28B and PLAGL1 reduced the number of viable cells in P5K cells. P5W and P5K cells were infected with the indicated shRNA-expressing lentiviruses. Viability was assayed by trypan-blue following 6 days *in vitro*. Values are normalized to control shRNA (shLuc) and log transformed. Bars indicate mean  $\pm$  S.E.M. ( $n = 3\sim 6$ ). (B) Confirmation of silencing by real-time RT-qPCR. (C) Knockdown of LIN28B decreased the proliferation of P5K cells. P5W and P5K cells were transduced with control (shLuc) or LIN28B-shRNA expressing (shLIN28B#3) lentiviruses, respectively, and immunostained for Ki67. Bars indicate mean  $\pm$  S.D. ( $n = 4\sim 5$ ).

**Figure S11**

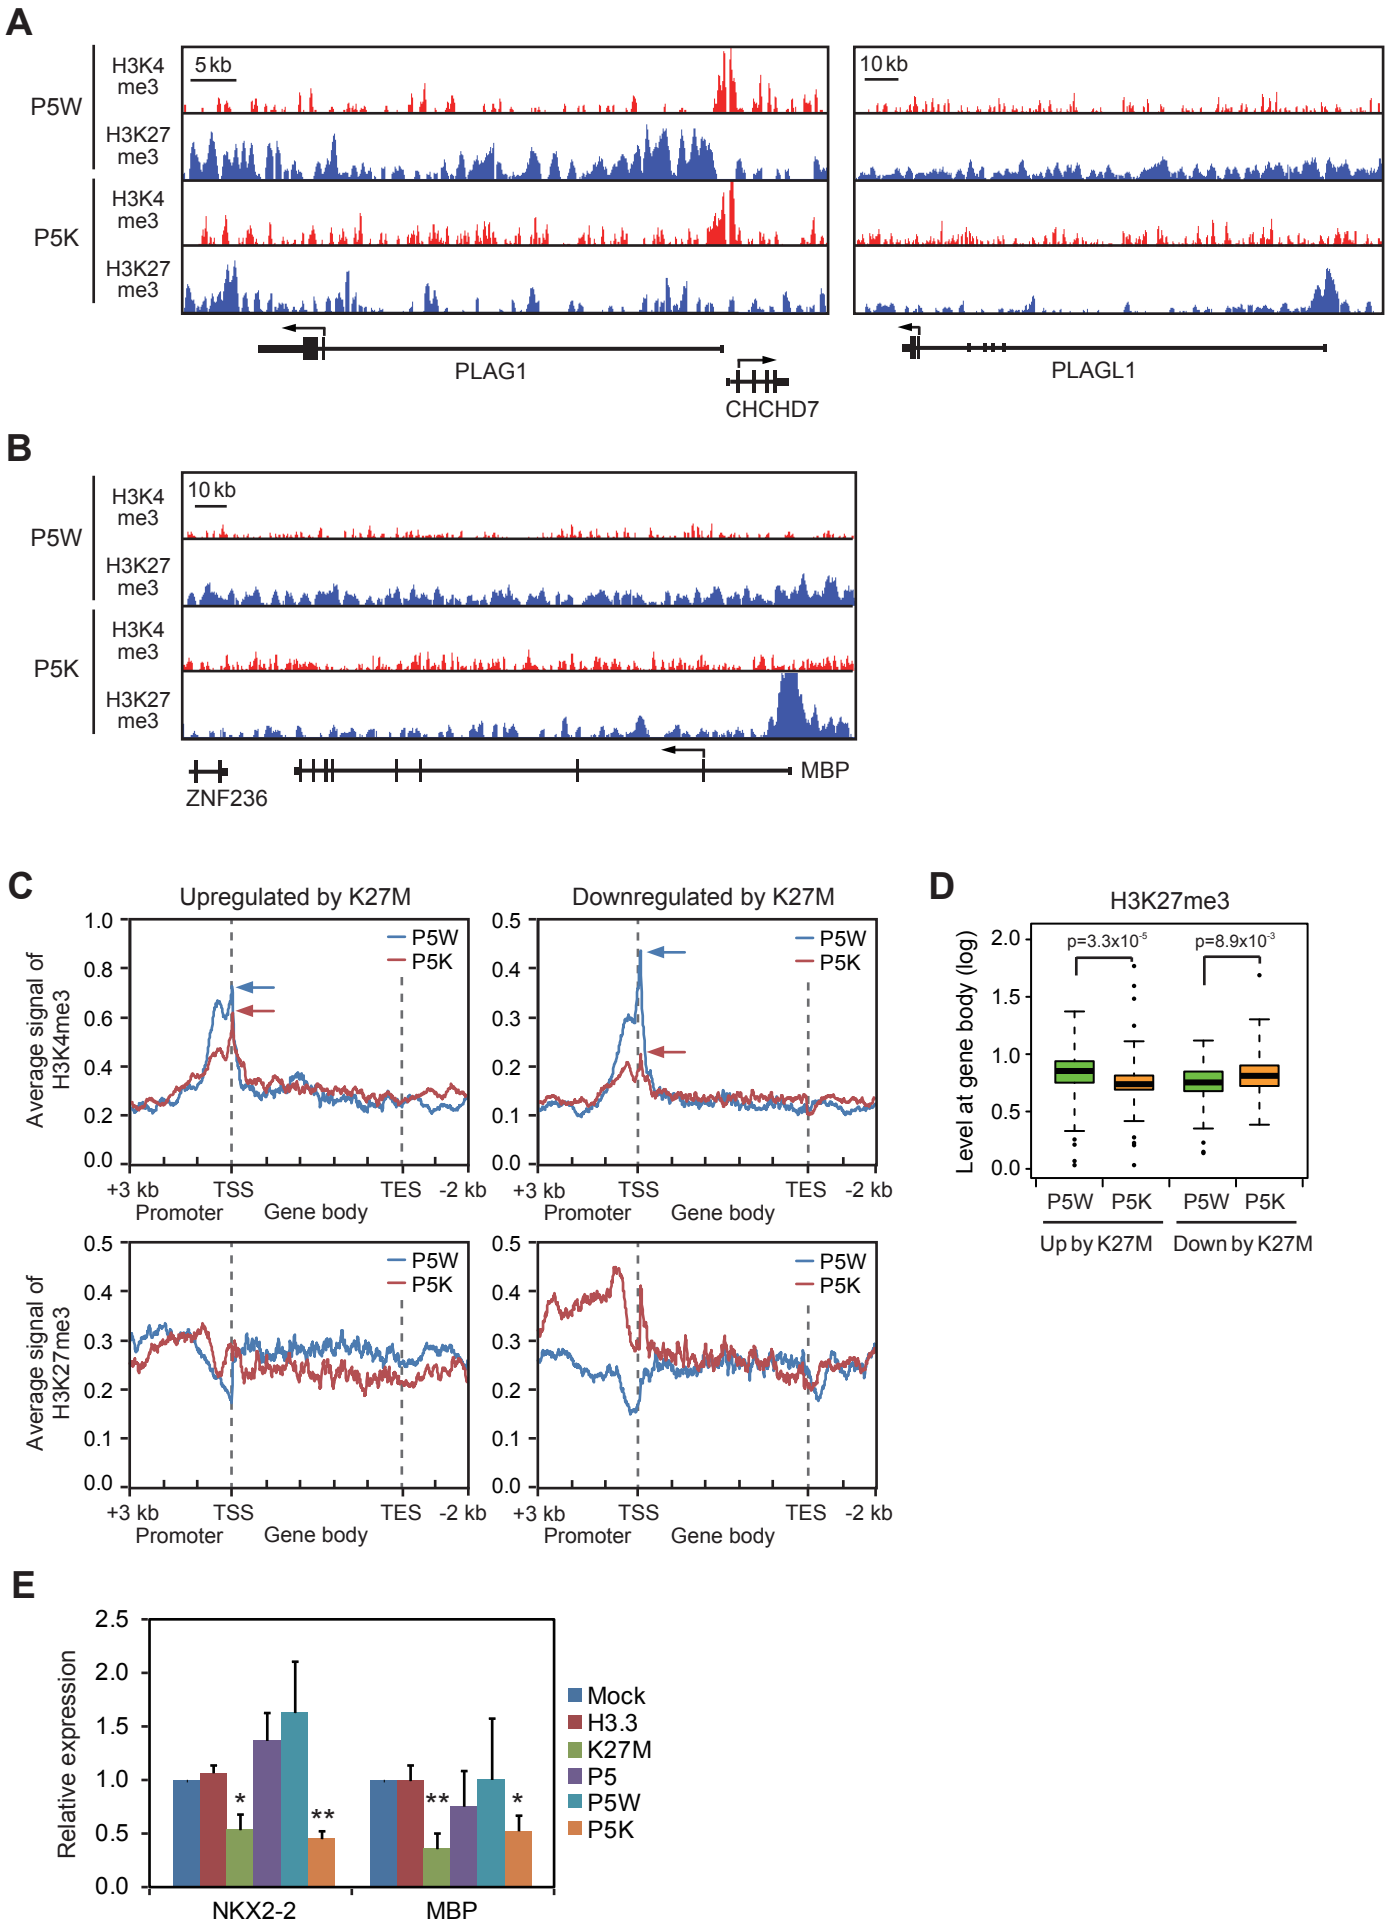

### Fig. S11

(A,B) Chromatin landscape of selected genes. H3K4me3 (red) and H3K27me3 (blue) marks are shown for P5W and P5K cells. (C) Profiles of H3K4me3 and H3K27me3 marks over the upregulated (91 genes) or downregulated (80 genes) by K27M (Supplementary Table 3). Blue, P5W cells; red, P5K cells. Arrows indicate the peak of signal intensity. (D) Levels of H3K27me3 marks at the gene-body region of the genes upregulated or downregulated by K27M. P-values were calculated by the Wilcoxon rank-sum test. (E) Decreased expression of Nkx2-2 and MBP was confirmed by RT-qPCR. Bars indicate mean  $\pm$  S.E.M. ( $n = 3\sim 5$ ). \*,  $p < 0.05$ ; \*\*,  $p < 0.01$ .

**Figure S12**

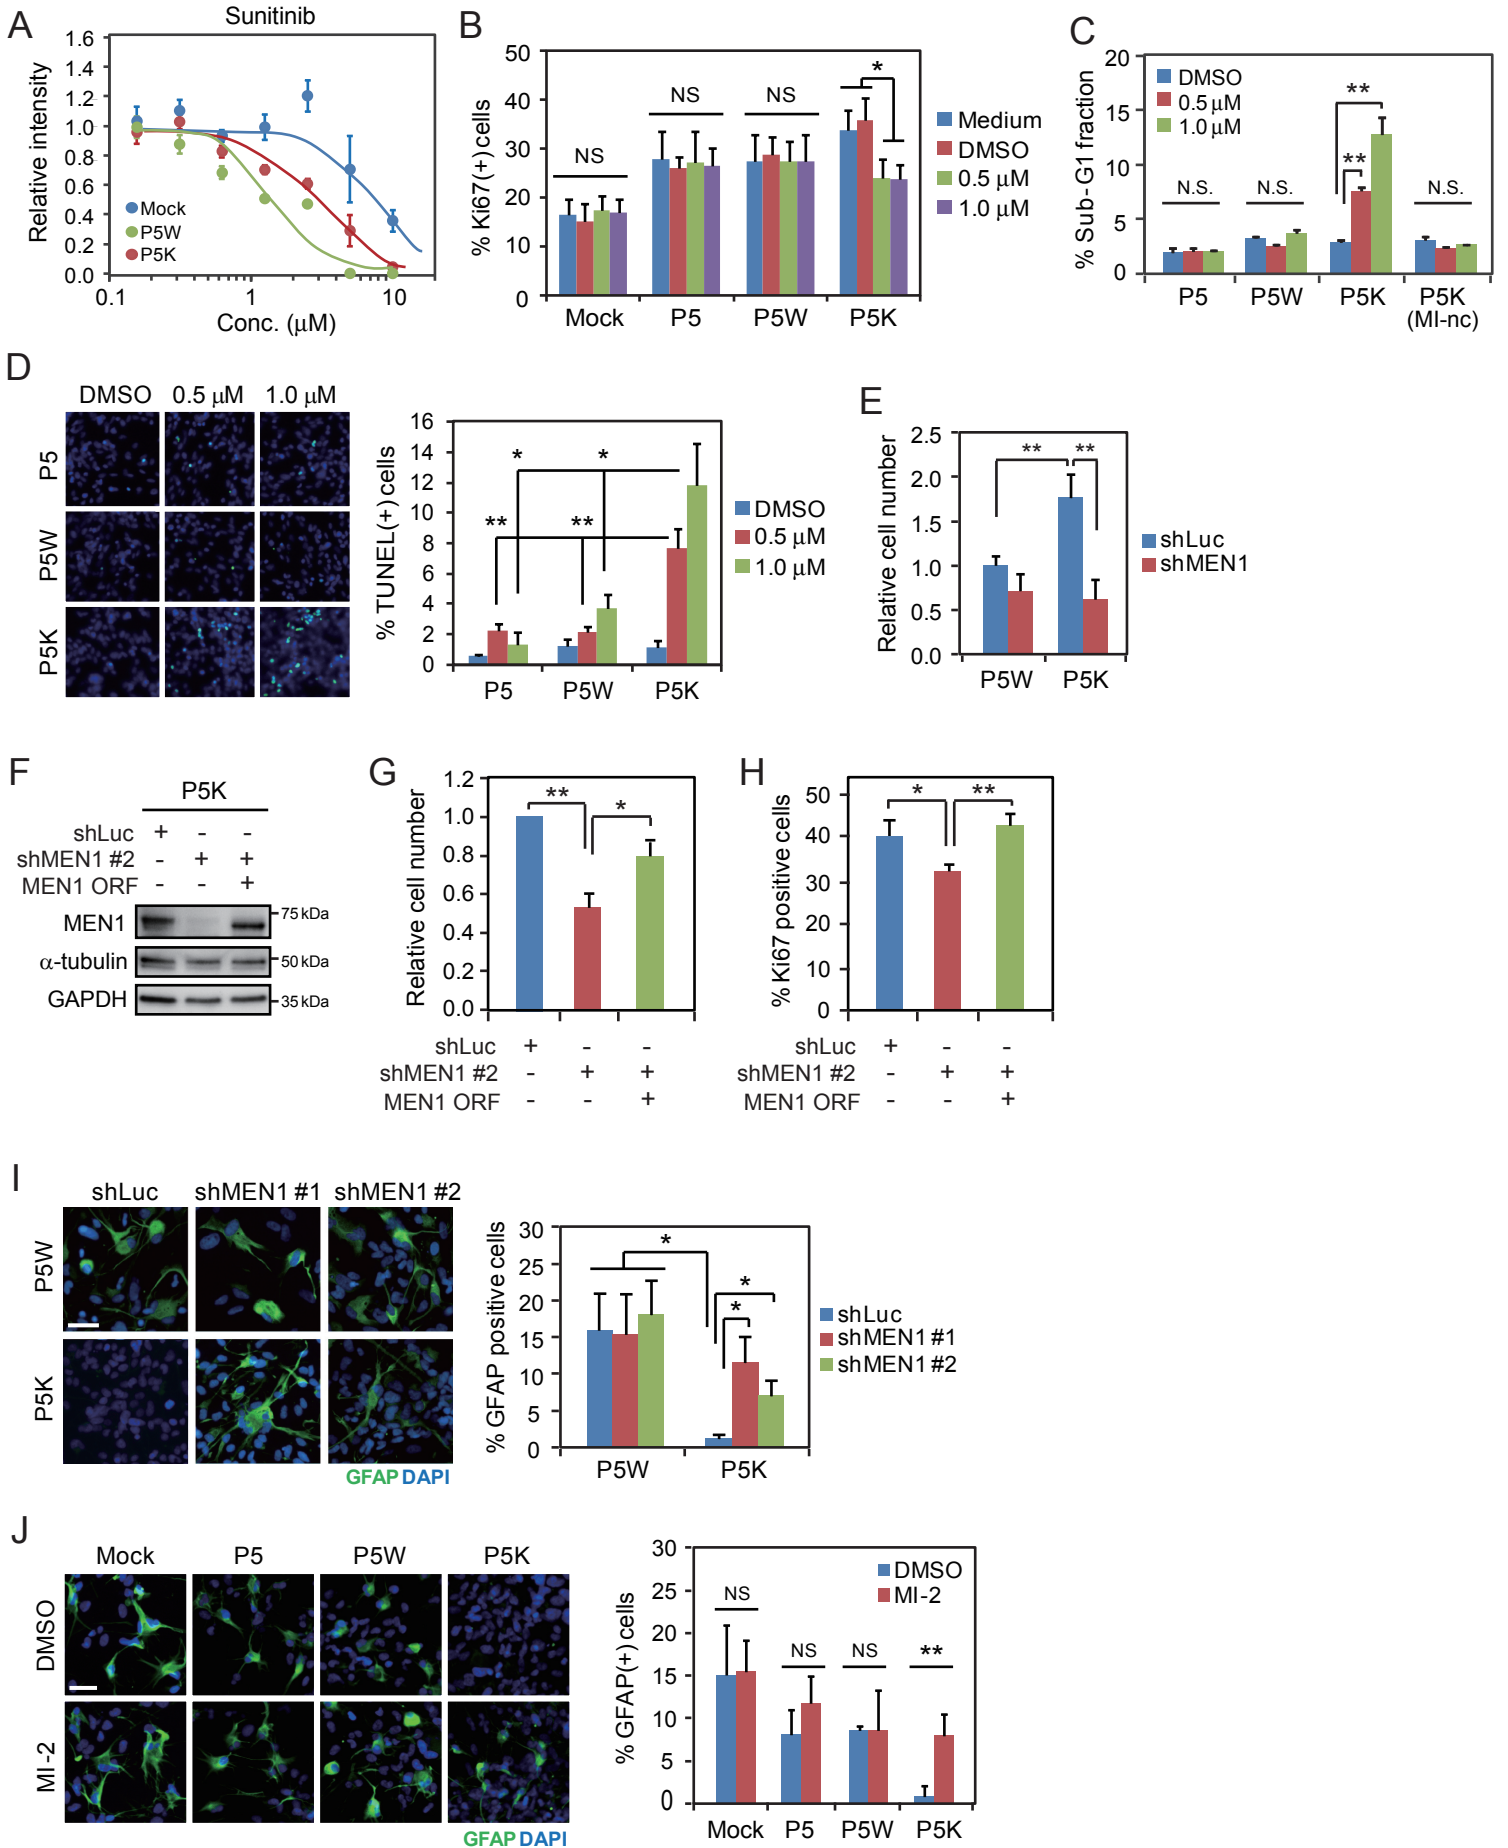

## Fig. S12

(A) Representative dose response curves in normal NPCs (Mock, blue), P5W (green) and P5K (red) cells treated with Sunitinib. Error bars indicate S.D. ( $n = 4$ ). (B) Proliferation assay demonstrates a significant effect of MI-2 on P5K cells, with no impact on normal or P5W cells. Bars indicate mean  $\pm$  S.D. ( $n = 4$ ). (C,D) MI-2 treatment induced cell death in P5K cells. After 6 days of treatment, the percentage of dead cells was measured by Sub-G1 assay (C) and TUNEL staining (D). (E) Knockdown of menin decreased the proliferation of P5K cells. The number of viable cells was counted by trypan-blue staining. Bars indicate mean  $\pm$  S.D. ( $n = 4$ ). (F) Confirmation of menin knockdown and rescue by western blotting. The expression of menin was suppressed by the shRNA targeting 3' UTR of menin (shMEN1 #2) and rescued by the overexpression of menin ORF (MEN1 ORF) in P5K cells. (G and H) Proliferation of P5K cells was decreased by menin knockdown and rescued by the overexpression of menin ORF. Viability and proliferation were assessed by trypan-blue staining (G) and Ki67 staining (H). Bars indicate mean  $\pm$  S.D. ( $n = 4\sim 5$ ). (I,J) Suppression of menin restored astrocytic differentiation in P5K cells. P5K cells transduced with control or menin shRNA-expressing lentiviruses (shMEN #1 and shMEN #2), were cultured under the differentiation condition. Following 14 days *in vitro*, astrocytic differentiation was assessed by immunostaining for GFAP (I). Cells were cultured under the differentiation condition with or without MI-2 (0.5  $\mu$ M) for 14 days (J). Bars indicate mean  $\pm$  S.D. ( $n = 4\sim 5$ ). Scale, 20  $\mu$ m. \*,  $p < 0.05$ ; \*\*,  $p < 0.01$ . NS, Not Significant.

**Figure S13**

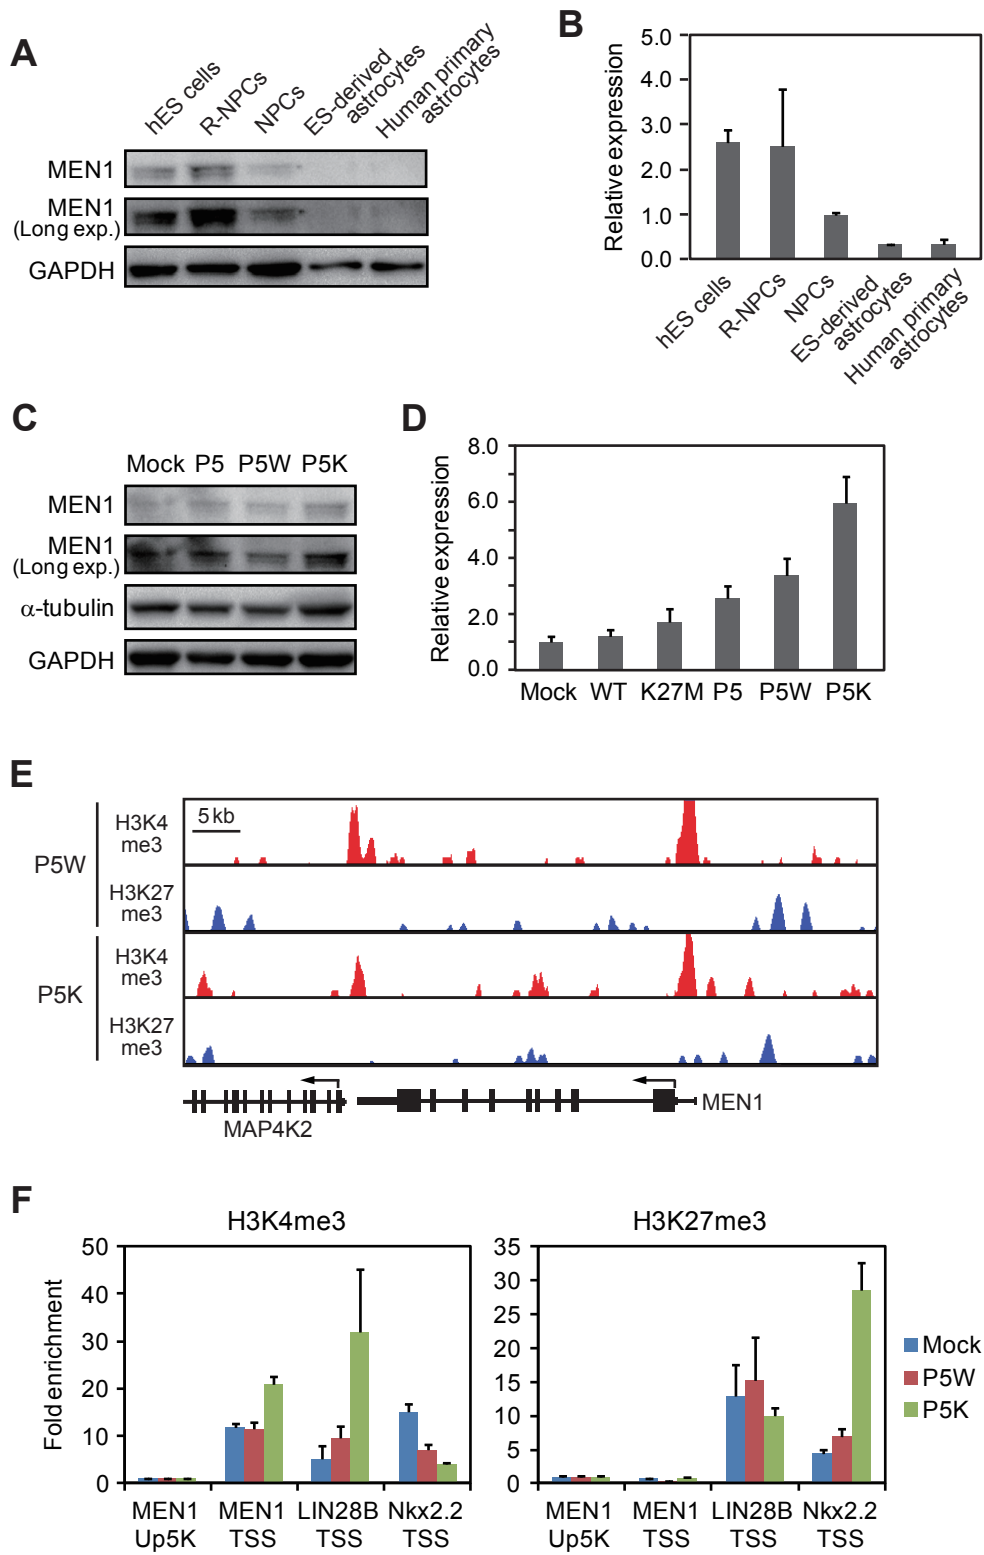

**Fig. S13**

(A,B) Increased expression of menin in P5K cells is shown by western blotting (A) and RT-qPCR (B). (C,D) Expression level of menin is upregulated in human ES cells and rosette-stage NPCs (R-NPCs), whereas downregulated in astrocytes. Bars in (B,D) indicate mean  $\pm$  S.E.M. ( $n = 3\sim 5$ ). (E,F) Chromatin landscape of *MEN1* locus in P5W and P5K cells. ChIP-seq data for H3K4me3 (red) and H3K27me3 (blue)(E), and validation by ChIP-PCR (F). Bars indicate mean  $\pm$  S.D. ( $n = 3$ ).

**Figure S14**

**A**

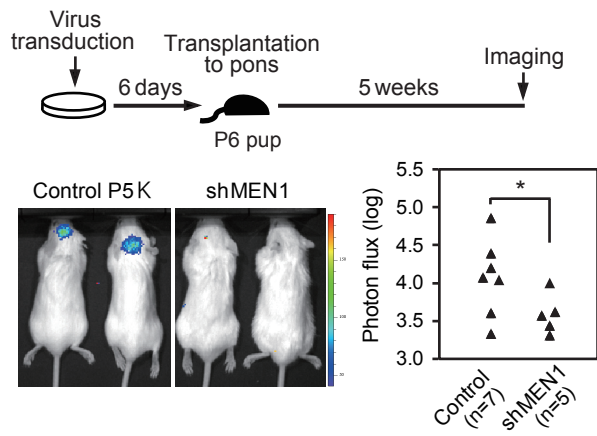

**B**

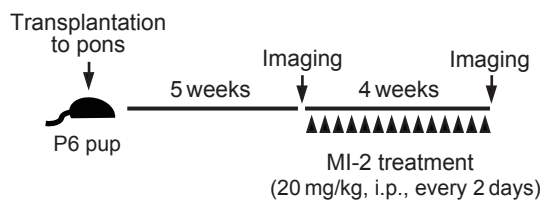



**Fig. S14**

(A) Knockdown of menin suppresses *in vivo* growth of P5K cells. Intracranial growth of Luciferase-labeled P5K cells, transduced with control or menin shRNA-expressing (shMEN1) lentiviruses, was measured by quantitative *in vivo* bioluminescence imaging (IVIS). (B) Schematic representation of the drug treatment experiment shown in Fig 4G. \*,  $p < 0.05$

**Figure S15**

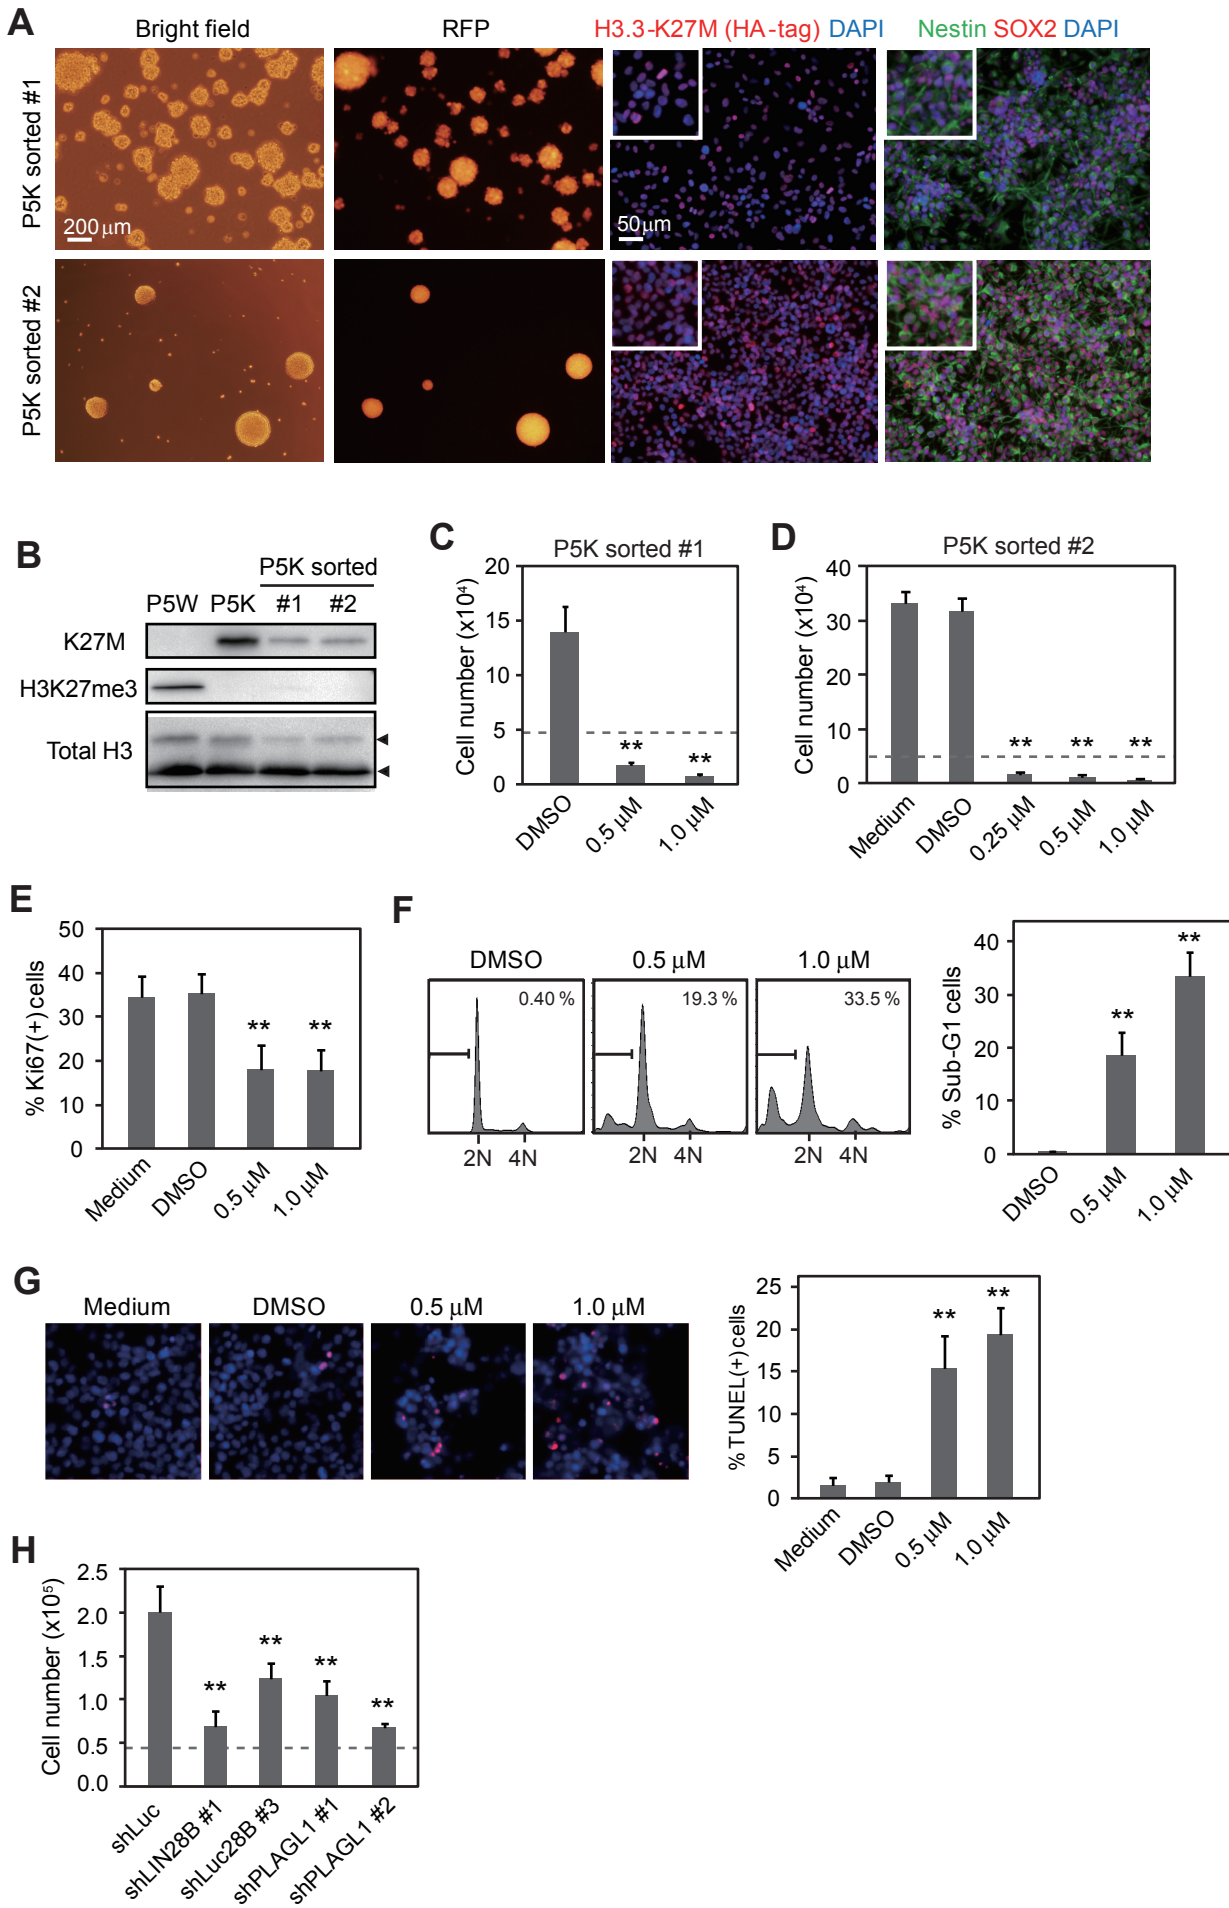

**Fig. S15**

(A) Characterization of P5K cells sorted from mouse xenografts. Cells can be grown in both sphere (left panels) and adherent-culture (right panels). Immunohistochemistry demonstrates maintenance of SOX2 and Nestin expression as well as H3.3K27M transgene. (B) Western blotting of xenograft-derived P5K cells shows the expression of K27M and loss of H3K27 trimethylation mark (H3K27me3). Higher bands in the total H3 blot indicate hemagglutinin (HA)-tagged H3.3 transgene. (C,D) Sorted P5K cells were treated with MI-2 for 7 days and the number of viable cells was counted by trypan-blue staining. Bars indicate mean  $\pm$  S.D. ( $n = 4$ ). (E) MI-2 treatment suppressed the proliferation of sorted P5K cells. Cells were treated with MI-2 at various concentrations for 5 days and immunostained for Ki67. Bars indicate mean  $\pm$  S.D. ( $n = 4\sim 5$ ). (F,G) MI-2 treatment induced cell death in sorted P5K cells. Following 6 days of treatment, the percentage of dead cells was measured by Sub-G1 assay (F) and TUNEL staining (G). Bars indicate mean  $\pm$  S.D. ( $n = 4$ ). (H) Knockdown of LIN28B and PLAGL1 reduced the number of viable cells in sorted P5K cells. Cells were infected with the indicated shRNA-expressing lentiviruses. Viability was assayed by trypan-blue following 6 days *in vitro*. Bars indicate mean  $\pm$  S.D. ( $n = 4$ ). \*\*,  $p < 0.01$ .

Figure S16

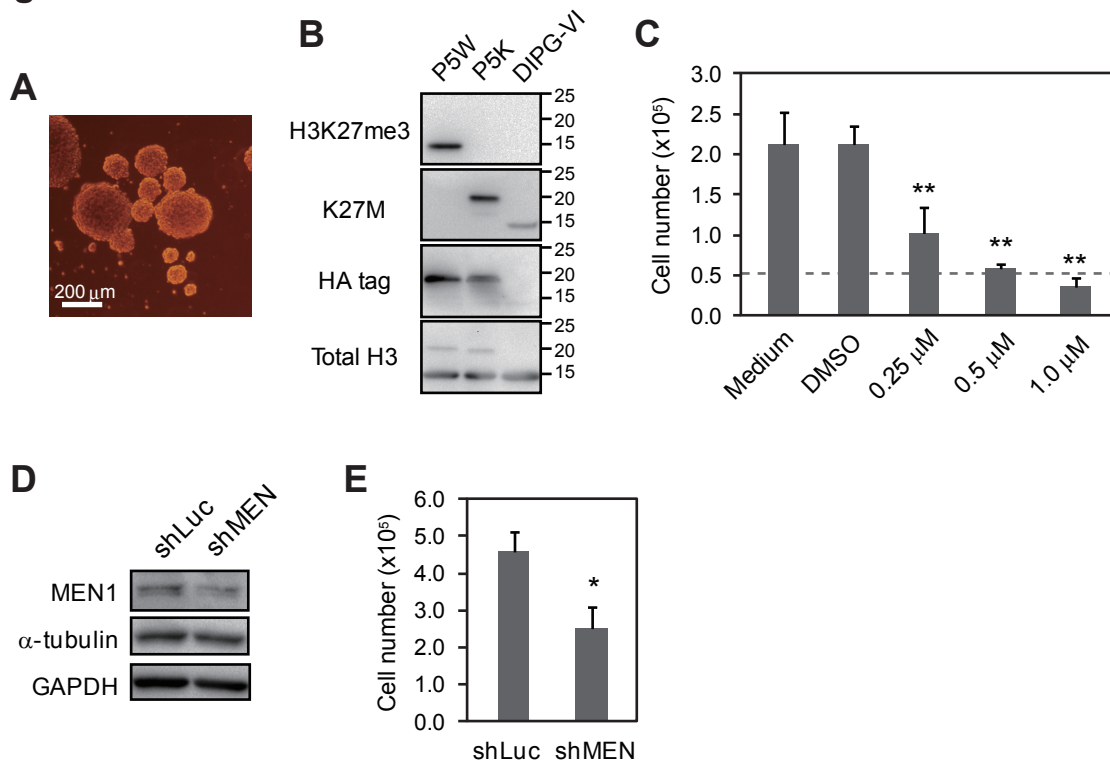

**Fig. S16**

(A) Bright phase microscopy of a patient-derived DIPG cell line. (B) Western blotting indicates the presence of H3.3K27M mutation and significant reduction of H3K27 trimethylation mark (H3K27me3) in the DIPG cell line (DIPG-VI). (C) MI-2 treatment suppressed the proliferation of DIPG cell line. Cells were treated with MI-2 for 7 days and the number of viable cells was counted by trypan-blue staining. Bars indicate mean  $\pm$  S.D. ( $n = 4$ ). (D,E) Knockdown of menin suppressed the proliferation of DIPG cell line. Cells were transduced with control or menin shRNA-expressing (shMEN) lentiviruses. Following 7 days *in vitro*, knockdown of menin was confirmed by western blotting (D) and the number of viable cells was counted by trypan-blue staining (E). Bars indicate mean  $\pm$  S.D. ( $n = 4$ ). \*,  $p < 0.05$ ; \*\*,  $p < 0.01$ .

**Table S1. Genes upregulated in cells expressing the H3.3 K27M mutation (K27M + P5K vs all other conditions)**

| Rank | Gene ID (Affymetrix) | Gene Description                                                      | Score (Signal-to-noise ratio) |
|------|----------------------|-----------------------------------------------------------------------|-------------------------------|
| 1    | 232231_at            | runt-related transcription factor 2, RUNX2                            | 9.73                          |
| 2    | 205229_s_at          | coagulation factor C homolog, cochlin (Limulus polyphemus), COCH      | 8.15                          |
| 3    | 1554242_a_at         | coagulation factor C homolog, cochlin (Limulus polyphemus), COCH      | 7.49                          |
| 4    | 222392_x_at          | PERP, TP53 apoptosis effector, PERP                                   | 6.70                          |
| 5    | 218499_at            | serine/threonine protein kinase MST4, MST4                            | 6.63                          |
| 6    | 243356_at            |                                                                       | 6.52                          |
| 7    | 222701_s_at          | coiled-coil-helix-coiled-coil-helix domain containing 7, CHCHD7       | 6.39                          |
| 8    | 206023_at            | neuromedin U, NMU                                                     | 5.87                          |
| 9    | 217744_s_at          | PERP, TP53 apoptosis effector, PERP                                   | 5.74                          |
| 10   | 204984_at            | glypican 4, GPC4                                                      | 5.73                          |
| 11   | 205372_at            | <b>pleiomorphic adenoma gene 1, PLAG1</b>                             | 5.72                          |
| 12   | 223038_s_at          | family with sequence similarity 60, member A, FAM60A                  | 5.66                          |
| 13   | 219523_s_at          | odz, odd Oz/ten-m homolog 3 (Drosophila), ODZ3                        | 5.22                          |
| 14   | 218872_at            | tescalcin, TESC                                                       | 4.95                          |
| 15   | 229349_at            | <b>lin-28 homolog B (C. elegans), LIN28B</b>                          | 4.87                          |
| 16   | 229385_s_at          | placenta-specific 2 (non-protein coding), PLAC2                       | 4.65                          |
| 17   | 220147_s_at          | family with sequence similarity 60, member A, FAM60A                  | 4.60                          |
| 18   | 233814_at            | ephrin-A5, EFNA5                                                      | 4.51                          |
| 19   | 228107_at            | hypothetical protein LOC100127983, LOC100127983                       | 4.41                          |
| 20   | 205190_at            | plastin 1, PLS1                                                       | 4.40                          |
| 21   | 205201_at            | GLI family zinc finger 3, GLI3                                        | 4.36                          |
| 22   | 1559266_s_at         | chromosome 10 open reading frame 140, C10orf140                       | 4.26                          |
| 23   | 209763_at            | chordin-like 1, CHRDL1                                                | 4.25                          |
| 24   | 227307_at            | tetraspanin 18, TSPAN18                                               | 4.21                          |
| 25   | 1559360_at           |                                                                       | 4.16                          |
| 26   | 227623_at            | calcium channel, voltage-dependent, alpha 2/delta subunit 1, CACNA2D1 | 4.15                          |
| 27   | 238865_at            | poly(A) binding protein, cytoplasmic 4-like, PABPC4L                  | 4.13                          |
| 28   | 227955_s_at          | ephrin-A5, EFNA5                                                      | 4.11                          |
| 29   | 207943_x_at          | <b>pleiomorphic adenoma gene-like 1, PLAGL1</b>                       | 4.10                          |
| 30   | 206953_s_at          | latrophilin 2, LPHN2                                                  | 4.06                          |
| 31   | 231310_at            |                                                                       | 4.02                          |
| 32   | 214785_at            | vacuolar protein sorting 13 homolog A (S. cerevisiae), VPS13A         | 3.98                          |
| 33   | 222900_at            | nuclear receptor interacting protein 3, NRIP3                         | 3.97                          |
| 34   | 233257_at            |                                                                       | 3.94                          |
| 35   | 217809_at            | basic leucine zipper and W2 domains 2, BZW2                           | 3.93                          |
| 36   | 214036_at            | ephrin-A5, EFNA5                                                      | 3.92                          |
| 37   | 209212_s_at          | Kruppel-like factor 5 (intestinal), KLF5                              | 3.92                          |

|    |             |                                                                            |      |
|----|-------------|----------------------------------------------------------------------------|------|
| 38 | 207002_s_at | <b>pleiomorphic adenoma gene-like 1, PLAGL1</b>                            | 3.83 |
| 39 | 209318_x_at | <b>pleiomorphic adenoma gene-like 1, PLAGL1</b>                            | 3.83 |
| 40 | 1560652_at  |                                                                            | 3.80 |
| 41 | 1569652_at  | mixed-lineage leukemia (trithorax homolog); translocated to, 3, MLLT3      | 3.79 |
| 42 | 219778_at   | zinc finger protein, multitype 2, ZFPM2                                    | 3.79 |
| 43 | 221760_at   | mannosidase, alpha, class 1A, member 1, MAN1A1                             | 3.78 |
| 44 | 233002_at   | protein phosphatase 4, regulatory subunit 4, PPP4R4                        | 3.78 |
| 45 | 226117_at   | TRAF-interacting protein with forkhead-associated domain, TIFA             | 3.76 |
| 46 | 220987_s_at | chromosome 11 open reading frame 17 /// NUAK2                              | 3.72 |
| 47 | 225177_at   | RAB11 family interacting protein 1 (class I), RAB11FIP1                    | 3.71 |
| 48 | 204983_s_at | glypican 4, GPC4                                                           | 3.68 |
| 49 | 225051_at   | erythrocyte membrane protein band 4.1 (elliptocytosis 1, RH-linked), EPB41 | 3.68 |
| 50 | 227415_at   | hypothetical protein LOC283508, LOC283508                                  | 3.67 |

**Table S2. Genes downregulated in cells expressing the H3.3 K27M mutation (K27M + P5K vs all other conditions)**

| Rank | Gene ID (Affymetrix) | Gene Description                                                                         | Score (Signal-to-noise ratio) |
|------|----------------------|------------------------------------------------------------------------------------------|-------------------------------|
| 1    | 235562_at            | chromosome 3 open reading frame 70, C3orf70                                              | -7.45276                      |
| 2    | 242447_at            | chromosome 3 open reading frame 70, C3orf70                                              | -7.12643                      |
| 3    | 227055_at            | methyltransferase like 7B, METTL7B                                                       | -6.85883                      |
| 4    | 240242_at            |                                                                                          | -6.79264                      |
| 5    | 206306_at            | ryanodine receptor 3, RYR3                                                               | -6.59394                      |
| 6    | 207981_s_at          | estrogen-related receptor gamma, ESRRG                                                   | -6.33449                      |
| 7    | 204916_at            | receptor (G protein-coupled) activity modifying protein 1, RAMP1                         | -6.06627                      |
| 8    | 203908_at            | solute carrier family 4, sodium bicarbonate cotransporter, member 4, SLC4A4              | -6.05743                      |
| 9    | 229382_at            | chromosome 1 open reading frame 183, C1orf183                                            | -6.01959                      |
| 10   | 229266_at            | shisa homolog 6 ( <i>Xenopus laevis</i> ), SHISA6                                        | -5.9745                       |
| 11   | 213543_at            | sarcoglycan, delta (35kDa dystrophin-associated glycoprotein), SGCD                      | -5.82467                      |
| 12   | 1552626_a_at         | transmembrane protein 163, TMEM163                                                       | -5.65298                      |
| 13   | 207093_s_at          | oligodendrocyte myelin glycoprotein, OMG                                                 | -5.35129                      |
| 14   | 227148_at            | pleckstrin homology domain containing, family H member 2, PLEKHH2                        | -5.34979                      |
| 15   | 200953_s_at          | cyclin D2, CCND2                                                                         | -5.31529                      |
| 16   | 207789_s_at          | dipeptidyl-peptidase 6, DPP6                                                             | -5.30983                      |
| 17   | 231001_at            | fin bud initiation factor homolog (zebrafish), FIBIN                                     | -5.24142                      |
| 18   | 226769_at            | fin bud initiation factor homolog (zebrafish), FIBIN                                     | -5.13636                      |
| 19   | 228546_at            | dipeptidyl-peptidase 6, DPP6                                                             | -5.1138                       |
| 20   | 213832_at            | potassium voltage-gated channel, Shal-related subfamily, member 3, KCND3                 | -5.0929                       |
| 21   | 220761_s_at          | TAO kinase 3, TAOK3                                                                      | -5.06633                      |
| 22   | 231098_at            |                                                                                          | -5.05854                      |
| 23   | 241706_at            | copine VIII, CPNE8                                                                       | -5.04386                      |
| 24   | 233129_at            |                                                                                          | -5.03761                      |
| 25   | 232377_at            | neurexophilin 1, NXPH1                                                                   | -4.91254                      |
| 26   | 218807_at            | vav 3 guanine nucleotide exchange factor, VAV3                                           | -4.91059                      |
| 27   | 206462_s_at          | neurotrophic tyrosine kinase, receptor, type 3, NTRK3                                    | -4.89773                      |
| 28   | 212098_at            | mannosyl ( $\alpha$ -1,6-)-glycoprotein beta-1,6-N-acetyl-glucosaminyltransferase, MGAT5 | -4.88847                      |
| 29   | 223923_at            | chromosome 21 open reading frame 62, C21orf62                                            | -4.84926                      |
| 30   | 239221_at            | G protein-coupled receptor 123, GPR123                                                   | -4.84522                      |
| 31   | 206915_at            | <b>NK2 homeobox 2, NKX2-2</b>                                                            | -4.84372                      |
| 32   | 223503_at            | transmembrane protein 163, TMEM163                                                       | -4.77141                      |
| 33   | 212190_at            | serpin peptidase inhibitor, clade E (nexin), member 2, SERPINE2                          | -4.75121                      |
| 34   | 223468_s_at          | RGM domain family, member A, RGMA                                                        | -4.70716                      |



|    |             |                                                                          |          |
|----|-------------|--------------------------------------------------------------------------|----------|
| 35 | 206243_at   | TIMP metallopeptidase inhibitor 4, TIMP4                                 | -4.68817 |
| 36 | 219564_at   | potassium inwardly-rectifying channel, subfamily J, member 16, KCNJ16    | -4.67798 |
| 37 | 219049_at   | chondroitin sulfate N-acetylgalactosaminyltransferase 1, CSGALNACT1      | -4.62745 |
| 38 | 229759_s_at | ventricular zone expressed PH domain homolog 1 (zebrafish), VEPH1        | -4.62055 |
| 39 | 202242_at   | tetraspanin 7, TSPAN7                                                    | -4.59022 |
| 40 | 205475_at   | stimulator of chondrogenesis 1, SCRG1                                    | -4.55727 |
| 41 | 238003_at   | hepatocyte cell adhesion molecule, HEPACAM                               | -4.55185 |
| 42 | 220543_at   | chromosome 21 open reading frame 62, C21orf62                            | -4.55149 |
| 43 | 215014_at   | potassium voltage-gated channel, Shal-related subfamily, member 3, KCND3 | -4.52529 |
| 44 | 217033_x_at | neurotrophic tyrosine kinase, receptor, type 3, NTRK3                    | -4.51016 |
| 45 | 232235_at   | dermatan sulfate epimerase-like, DSEL                                    | -4.46631 |
| 46 | 240458_at   |                                                                          | -4.44163 |
| 47 | 236599_at   |                                                                          | -4.4402  |
| 48 | 1557143_at  | CUB and Sushi multiple domains 2, CSMD2                                  | -4.42817 |
| 49 | 213618_at   | ArfGAP with RhoGAP domain, ankyrin repeat and PH domain 2, ARAP2         | -4.39381 |
| 50 | 209356_x_at | EGF-containing fibulin-like extracellular matrix protein 2, EFEMP2       | -4.38892 |

**Table S3.** Levels of H3K4me3 and H3K27me3 at promoter regions of genes that are upregulated or downregulated by K27M.

| K4me3 | K27me3 |
|-------|--------|
| >1.0  | >0.6   |
| >2.0  | >1.0   |
| >3.0  | >2.0   |

| Genes upregulated by K27M |       |        |       |        |
|---------------------------|-------|--------|-------|--------|
| Name                      | P5W   |        | P5K   |        |
|                           | K4me3 | K27me3 | K4me3 | K27me3 |
| Runx2                     | 0.87  | 0.34   | 0.93  | 0.14   |
| COCH                      | 1.32  | 0.48   | 1.02  | 0.34   |
| PERP                      | 0.63  | 0.55   | 0.40  | 1.00   |
| CHCHD7                    | 1.97  | 0.11   | 1.79  | 0.54   |
| NMU                       | 0.58  | 0.70   | 0.77  | 0.37   |
| MST4                      | 0.63  | 0.57   | 1.37  | 0.66   |
| GPC4                      | 2.21  | 0.43   | 1.47  | 0.29   |
| PLAG1                     | 1.97  | 0.11   | 1.88  | 0.51   |
| FAM60A                    | 1.50  | 0.30   | 1.12  | 0.46   |
| TESC                      | 0.34  | 0.39   | 0.56  | 0.37   |
| LIN28B                    | 0.55  | 0.95   | 0.91  | 1.46   |
| EFNA5                     | 0.97  | 0.30   | 1.00  | 0.66   |
| PLS1                      | 1.74  | 0.52   | 0.93  | 0.29   |
| GLI3                      | 2.13  | 0.27   | 0.88  | 0.20   |
| CHRD1                     | 1.11  | 0.43   | 0.93  | 0.29   |
| TSPAN18                   | 0.63  | 0.61   | 0.53  | 0.20   |
| CACNA2D1                  | 1.71  | 0.14   | 0.95  | 0.34   |
| PABPC4L                   | 0.95  | 0.43   | 0.65  | 0.23   |
| PLAGL1                    | 0.53  | 0.50   | 0.44  | 1.89   |
| LPHN2                     | 1.39  | 0.32   | 1.00  | 0.31   |
| VPS13A                    | 1.24  | 0.45   | 0.74  | 0.46   |
| BZW2                      | 2.37  | 0.43   | 1.35  | 0.40   |
| KLF5                      | 1.66  | 0.34   | 0.98  | 0.40   |
| MLLT3                     | 1.79  | 0.20   | 0.74  | 0.14   |
| ZFPM2                     | 1.03  | 0.27   | 0.63  | 0.54   |
| MAN1A1                    | 3.11  | 0.18   | 1.88  | 0.80   |
| PPP4R4                    | 0.82  | 0.27   | 0.88  | 0.37   |
| TIFA                      | 0.68  | 0.43   | 0.79  | 0.20   |
| NUAK2                     | 1.26  | 0.32   | 1.23  | 0.46   |
| CDH8                      | 0.47  | 0.82   | 0.70  | 1.03   |
| BCL11A                    | 1.32  | 0.14   | 0.58  | 0.57   |
| RBPM5                     | 2.05  | 0.23   | 1.26  | 0.40   |

|         |      |      |      |      |
|---------|------|------|------|------|
| NRIP3   | 0.87 | 0.41 | 0.49 | 0.57 |
| DACH1   | 1.50 | 0.27 | 0.79 | 1.66 |
| CDKN1C  | 0.39 | 0.18 | 0.63 | 0.20 |
| RGS10   | 0.71 | 0.27 | 0.74 | 0.80 |
| CTSC    | 1.89 | 0.41 | 1.51 | 0.31 |
| PAK1    | 0.47 | 0.09 | 0.70 | 0.11 |
| SNAI2   | 1.05 | 0.27 | 0.77 | 0.29 |
| DPYD    | 2.47 | 0.45 | 1.02 | 0.49 |
| MAML3   | 1.47 | 0.18 | 0.79 | 0.14 |
| BSG     | 1.92 | 0.25 | 0.95 | 0.46 |
| H1FX    | 1.87 | 0.43 | 0.74 | 0.43 |
| CDH6    | 1.21 | 0.41 | 1.09 | 0.51 |
| STXBP6  | 0.92 | 0.27 | 0.60 | 0.37 |
| SSX2IP  | 1.61 | 0.20 | 0.98 | 0.37 |
| SLC44A1 | 1.58 | 0.34 | 0.60 | 0.29 |
| SMC4    | 4.50 | 0.34 | 2.09 | 0.80 |
| H1F0    | 0.47 | 0.36 | 0.40 | 1.91 |
| RUNX1T1 | 1.45 | 0.52 | 0.72 | 0.46 |
| SLC35F2 | 0.84 | 0.45 | 1.02 | 0.26 |
| NID1    | 1.18 | 0.25 | 1.12 | 0.43 |
| GJA3    | 0.32 | 0.34 | 0.28 | 3.37 |
| KLF10   | 2.05 | 0.16 | 1.07 | 0.51 |
| VGLL3   | 1.74 | 0.34 | 1.42 | 0.69 |
| DDIT4L  | 1.29 | 0.39 | 1.14 | 0.29 |
| MEF2C   | 2.26 | 0.34 | 1.21 | 0.69 |
| SLC6A15 | 1.03 | 0.82 | 0.93 | 0.60 |
| PHIP    | 2.97 | 0.23 | 1.35 | 0.51 |
| SFRP2   | 0.79 | 0.73 | 0.72 | 0.63 |
| CALB1   | 0.71 | 0.57 | 0.88 | 0.43 |
| RRAS2   | 0.89 | 0.55 | 1.23 | 0.83 |
| NEK2    | 1.50 | 0.36 | 0.95 | 0.29 |
| PHLDB2  | 0.45 | 0.36 | 0.56 | 0.63 |
| PPL     | 0.03 | 0.32 | 0.30 | 0.83 |
| SEMA3A  | 3.37 | 0.89 | 1.98 | 2.37 |
| TIAM1   | 2.53 | 0.36 | 1.65 | 0.46 |
| GABRA5  | 0.63 | 0.20 | 0.42 | 0.31 |
| SNCA    | 0.53 | 0.57 | 1.12 | 0.54 |
| KLHL14  | 0.18 | 0.61 | 0.42 | 0.80 |
| CDC14B  | 1.00 | 0.23 | 0.51 | 0.29 |
| ARL4C   | 1.00 | 0.16 | 0.53 | 0.26 |
| TMEM38B | 1.21 | 0.48 | 0.86 | 1.74 |
| TLE4    | 1.11 | 0.23 | 0.65 | 0.26 |
| ADAMTS3 | 2.50 | 0.16 | 1.60 | 0.23 |
| STX3    | 0.74 | 0.41 | 1.02 | 0.49 |

|        |      |      |      |      |
|--------|------|------|------|------|
| PRTG   | 2.82 | 0.23 | 1.40 | 0.20 |
| SHB    | 0.74 | 0.16 | 0.72 | 0.66 |
| MSI2   | 0.50 | 0.23 | 0.44 | 0.34 |
| TXNIP  | 2.55 | 0.18 | 1.42 | 0.31 |
| HDAC9  | 0.89 | 0.50 | 0.93 | 0.09 |
| SCEL   | 0.37 | 0.41 | 0.47 | 0.37 |
| CPS1   | 1.39 | 0.25 | 0.84 | 0.29 |
| TRIM36 | 1.45 | 0.16 | 0.88 | 1.94 |
| PDK4   | 1.34 | 0.27 | 1.05 | 0.23 |
| TPBG   | 0.79 | 0.75 | 0.44 | 1.29 |
| EMB    | 0.87 | 0.45 | 0.86 | 0.40 |
| FOXG1  | 0.11 | 0.16 | 0.28 | 0.54 |
| OTX2   | 0.71 | 0.64 | 1.12 | 1.97 |
| LIN7A  | 1.42 | 0.32 | 0.95 | 0.31 |
| HSPB1  | 1.13 | 0.45 | 0.60 | 0.74 |

| Genes downregulated by K27M |       |        |       |        |
|-----------------------------|-------|--------|-------|--------|
| Name                        | P5W   |        | P5K   |        |
|                             | K4me3 | K27me3 | K4me3 | K27me3 |
| AQP4                        | 1.16  | 0.23   | 0.47  | 0.43   |
| RYR3                        | 1.39  | 0.25   | 1.02  | 0.49   |
| NKX2-2                      | 0.92  | 0.18   | 0.40  | 3.97   |
| CCND2                       | 1.66  | 0.43   | 0.67  | 4.40   |
| ESRRG-P1                    | 1.03  | 0.80   | 0.37  | 1.91   |
| ESRRG-P2                    | 0.53  | 0.70   | 0.28  | 8.43   |
| DPP6                        | 0.71  | 0.18   | 0.33  | 1.31   |
| VAV3                        | 1.39  | 0.18   | 0.56  | 0.43   |
| PI3KR1                      | 2.42  | 0.27   | 1.60  | 0.66   |
| KAT7                        | 2.63  | 0.39   | 1.44  | 0.54   |
| TMEM163                     | 0.71  | 0.25   | 0.44  | 1.89   |
| CSMD2                       | 1.18  | 0.39   | 0.72  | 1.09   |
| SNRPN                       | 0.34  | 0.48   | 0.33  | 0.71   |
| TRAF4                       | 1.39  | 0.14   | 0.67  | 0.34   |
| FEZ1                        | 1.34  | 0.34   | 0.49  | 0.40   |
| GSTT1                       | 0.87  | 0.18   | 0.33  | 0.26   |
| KAT2B                       | 1.05  | 0.02   | 1.26  | 0.29   |
| BAI3                        | 1.97  | 0.11   | 1.40  | 0.20   |
| IQSEC1                      | 0.39  | 0.05   | 0.33  | 0.14   |
| SLC4A4                      | 2.42  | 0.20   | 1.53  | 0.37   |
| MAPK10                      | 1.58  | 0.45   | 0.53  | 0.34   |
| SLC6A1                      | 1.03  | 0.23   | 0.30  | 1.63   |

|          |      |      |      |      |
|----------|------|------|------|------|
| INPP4B   | 1.79 | 0.41 | 1.28 | 0.23 |
| BLM      | 3.05 | 0.43 | 1.37 | 0.31 |
| C3orf70  | 0.71 | 0.14 | 0.63 | 0.34 |
| SHISA6   | 0.63 | 0.09 | 0.05 | 0.83 |
| SGCD     | 0.63 | 0.45 | 0.19 | 0.51 |
| PLEKHH2  | 2.08 | 0.27 | 0.93 | 0.54 |
| FIBIN    | 0.45 | 0.34 | 0.95 | 0.23 |
| KCND3    | 1.37 | 0.16 | 0.58 | 0.29 |
| TAOK3    | 3.76 | 0.20 | 1.51 | 0.29 |
| CPNE8    | 2.68 | 0.43 | 0.91 | 0.80 |
| NXPH1    | 1.45 | 0.36 | 0.49 | 1.60 |
| NTRK3    | 2.34 | 0.23 | 0.56 | 0.37 |
| GPR123   | 0.55 | 0.39 | 0.44 | 0.40 |
| SERPINE2 | 2.08 | 0.25 | 1.40 | 0.17 |
| RGMA     | 1.24 | 0.39 | 0.63 | 0.83 |
| VEPH1    | 0.21 | 0.41 | 0.81 | 0.20 |
| SCRG1    | 1.21 | 0.50 | 0.53 | 0.80 |
| DSEL     | 2.95 | 0.39 | 1.72 | 0.51 |
| ARAP2    | 2.08 | 0.32 | 1.40 | 0.46 |
| RASSF2   | 1.66 | 0.20 | 0.74 | 0.43 |
| NLGN3    | 0.97 | 0.39 | 0.53 | 0.37 |
| CDH10    | 2.39 | 0.16 | 1.12 | 0.14 |
| LRRK2    | 0.68 | 0.30 | 0.49 | 0.43 |
| DOCK10   | 1.26 | 0.48 | 0.65 | 0.60 |
| SRI      | 2.08 | 0.25 | 1.05 | 0.31 |
| SLC6A11  | 1.05 | 0.25 | 0.40 | 1.63 |
| SLC6A1   | 1.03 | 0.23 | 0.30 | 1.63 |
| ITPR2    | 2.26 | 0.48 | 0.56 | 0.46 |
| DLC1     | 0.66 | 0.45 | 0.53 | 0.66 |
| GRIA1    | 2.82 | 0.55 | 0.84 | 0.37 |
| NPAS3    | 1.79 | 0.77 | 1.21 | 1.34 |
| MYO5C    | 0.97 | 0.20 | 0.72 | 0.26 |
| DMD      | 0.82 | 0.39 | 0.47 | 0.40 |
| TRIL     | 0.84 | 0.32 | 0.77 | 0.66 |
| ZEB1     | 3.16 | 0.11 | 1.70 | 0.31 |
| ZCCHC24  | 0.66 | 0.27 | 0.30 | 0.23 |
| TCF12-P1 | 1.53 | 0.23 | 1.07 | 0.31 |
| TCF12-P2 | 1.29 | 0.25 | 0.53 | 0.17 |
| PCYT1B   | 1.24 | 0.27 | 0.56 | 0.31 |
| SALL1    | 2.47 | 0.32 | 0.79 | 4.31 |
| VSTM2A   | 0.84 | 0.27 | 0.56 | 0.83 |
| SNTB1    | 1.18 | 0.45 | 0.58 | 1.29 |
| CST3     | 1.08 | 0.25 | 0.67 | 0.29 |
| PLD5     | 1.05 | 0.27 | 0.74 | 1.09 |

|          |      |      |      |      |
|----------|------|------|------|------|
| CTH      | 2.63 | 0.41 | 1.53 | 0.31 |
| SMOC1    | 1.21 | 0.30 | 0.58 | 0.46 |
| SLC15A2  | 1.29 | 0.23 | 0.72 | 0.34 |
| RGS6     | 1.32 | 0.30 | 0.47 | 0.66 |
| PLA2G16  | 1.37 | 0.18 | 0.74 | 0.09 |
| IGSF11   | 2.66 | 0.30 | 1.07 | 0.83 |
| SPOCK2   | 0.82 | 0.25 | 0.26 | 0.31 |
| RIT2     | 1.32 | 0.34 | 0.51 | 0.37 |
| TRIM9    | 1.13 | 0.45 | 0.77 | 0.29 |
| ZMAT4    | 1.08 | 0.45 | 0.40 | 0.34 |
| PHEX     | 0.16 | 0.57 | 0.56 | 0.74 |
| STAMBPL1 | 1.32 | 0.61 | 1.14 | 0.54 |
| PTPRE    | 1.50 | 0.20 | 0.77 | 0.17 |
| SYNE1    | 0.61 | 0.55 | 0.86 | 1.23 |
| CNKSR2   | 2.45 | 0.27 | 0.98 | 0.46 |
| ZNF93    | 2.03 | 0.16 | 0.95 | 0.34 |

**Table S4.** List of target genes by H3K27me3 marks or by PRC2 complex

| (A) P5W<br>H3K27me3<br>target | (B) P5K<br>H3K27me3<br>target | (C) P5K-<br>sepecific<br>H3K27me3<br>target | (D)<br>Benporath_ESC<br>H3K27me3<br>target | (E)<br>Benporath_ESC<br>PRC2 target | (C) AND (D)<br>shared | (C) AND (E)<br>shared |
|-------------------------------|-------------------------------|---------------------------------------------|--------------------------------------------|-------------------------------------|-----------------------|-----------------------|
| AATF                          | A4GALT                        | A4GALT                                      | AATF                                       | ABCC8                               | ACAN                  | ADAMTS18              |
| ACCSL                         | AARS2                         | AARS2                                       | ABCC3                                      | ABTB2                               | ACTL6B                | ADAP2                 |
| ACSM4                         | AATF                          | ABCE1                                       | ABCC8                                      | ADAMTS15                            | ADAMTS18              | ADARB2                |
| ACTBL2                        | ABCE1                         | ACAD9                                       | ABCG4                                      | ADAMTS18                            | ADAP2                 | ADCY8                 |
| ADCY4                         | ACAD9                         | ACAN                                        | ABTB2                                      | ADAP2                               | ADARB2                | ADCYAP1               |
| ADORA3                        | ACAN                          | ACHE                                        | ACADL                                      | ADARB2                              | ADCY8                 | ADRA1A                |
| AGBL5                         | ACHE                          | ACIN1                                       | ACAN                                       | ADCY4                               | ADCYAP1               | ADRB1                 |
| AGPAT5                        | ACIN1                         | ACOT13                                      | ACCN2                                      | ADCY8                               | ADRA1A                | ADRB3                 |
| AHCYL1                        | ACOT13                        | ACOXL                                       | ACTL6B                                     | ADCYAP1                             | ADRB1                 | AGPAT9                |
| AHCYL2                        | ACOXL                         | ACRV1                                       | ADAM15                                     | ADRA1A                              | ADRB3                 | ALOX15                |
| ALDH1A2                       | ACRV1                         | ACSL1                                       | ADAM22                                     | ADRA2A                              | AGPAT9                | ALX3                  |
| AMER3                         | ACSL1                         | ACSL5                                       | ADAMTS15                                   | ADRB1                               | AIM1                  | ALX4                  |
| AMPD1                         | ACSL5                         | ACSM1                                       | ADAMTS17                                   | ADRB3                               | ALOX15                | ANKRD18A              |
| ANKRD1                        | ACSM1                         | ACSS1                                       | ADAMTS18                                   | AGPAT9                              | ALX3                  | ANKRD18B              |
| ANO2                          | ACSS1                         | ACTA1                                       | ADAP2                                      | ALOX15                              | ALX4                  | ANKRD19P              |
| ANO6                          | ACTA1                         | ACTL6A                                      | ADARB2                                     | ALX3                                | ANKRD18A              | ANKRD27               |
| ANXA2P1                       | ACTL6A                        | ACTL6B                                      | ADC                                        | ALX4                                | ANKRD18B              | ASCL2                 |
| ARSF                          | ACTL6B                        | ACVR1C                                      | ADCY4                                      | ANKRD18A                            | ANKRD19P              | ASTN2                 |
| ARSH                          | ACVR1C                        | ADAM8                                       | ADCY8                                      | ANKRD18B                            | ANKRD27               | ATF3                  |
| ASB17                         | ADAM8                         | ADAMTS18                                    | ADCYAP1                                    | ANKRD19P                            | ARID3C                | ATOH8                 |
| ASCL5                         | ADAMTS18                      | ADAMTS2                                     | ADRA1A                                     | ANKRD20A1                           | ARNTL                 | BARHL1                |
| ASTL                          | ADAMTS2                       | ADAMTS20                                    | ADRA2A                                     | ANKRD20A2                           | ASCL2                 | BARHL2                |
| ATOH1                         | ADAMTS20                      | ADAMTS8                                     | ADRB1                                      | ANKRD20A3                           | ASCL4                 | BARX2                 |
| ATP8B4                        | ADAMTS8                       | ADAMTSL3                                    | ADRB3                                      | ANKRD20A5P                          | ASTN2                 | BATF3                 |
| ATXN7L2                       | ADAMTSL3                      | ADAP2                                       | ADRBK2                                     | ANKRD20A8P                          | ATF3                  | BHLHE23               |
| B4GALNT2                      | ADAP2                         | ADARB2                                      | AGAP2                                      | ANKRD27                             | ATOH8                 | C17orf102             |
| BARX1                         | ADARB2                        | ADCY8                                       | AGPAT9                                     | AQP5                                | BARHL1                | C17orf82              |
| BASP1                         | ADCY4                         | ADCYAP1                                     | AIM1                                       | ARHGAP20                            | BARHL2                | C1orf194              |
| BCL6                          | ADCY8                         | ADM                                         | ALOX15                                     | ARL9                                | BARX2                 | C1orf213              |
| BCL9                          | ADCYAP1                       | ADORA2A-AS1                                 | ALOXE3                                     | ASCL1                               | BATF3                 | C2CD4A                |
| BHLHE22                       | ADM                           | ADPGK                                       | ALX3                                       | ASCL2                               | BHLHE23               | CA10                  |
| BMF                           | ADORA2A-AS1                   | ADRA1A                                      | ALX4                                       | ASTN1                               | BMP6                  | CACNA1B               |
| BMP4                          | ADPGK                         | ADRB1                                       | AMELX                                      | ASTN2                               | C14orf132             | CACNA1D               |
| BNC1                          | ADRA1A                        | ADRB3                                       | AMN                                        | ATF3                                | C17orf102             | CACNA1E               |
| BPIFA1                        | ADRB1                         | AFAP1L2                                     | AMPH                                       | ATOH1                               | C17orf82              | CACNA1G               |
| BPIFA4P                       | ADRB3                         | AFF3                                        | ANKRD18A                                   | ATOH8                               | C1orf194              | CAMK2N1               |
| BPIFB4                        | AFAP1L2                       | AFM                                         | ANKRD18B                                   | B4GALNT1                            | C1orf213              | CBLN1                 |
| BSND                          | AFF3                          | AGBL4                                       | ANKRD19P                                   | B4GALNT2                            | C1orf94               | CD34                  |
| BTAF1                         | AFM                           | AGPAT9                                      | ANKRD20A1                                  | BARHL1                              | C1QL1                 | CD70                  |
| BTBD11                        | AGBL4                         | AHSA2                                       | ANKRD20A2                                  | BARHL2                              | C2CD4A                | CD8A                  |

|             |            |             |            |           |         |         |
|-------------|------------|-------------|------------|-----------|---------|---------|
| C10orf11    | AGBL5      | AHSP        | ANKRD20A3  | BARX1     | CA10    | CDH7    |
| C10orf126   | AGPAT5     | AIFM1       | ANKRD20A5P | BARX2     | CA7     | CDK5R2  |
| C12orf57    | AGPAT9     | AIM1        | ANKRD20A8P | BATF3     | CACNA1A | CDKN2C  |
| C14orf23    | AHSA2      | AJAP1       | ANKRD27    | BCL2      | CACNA1B | CDX2    |
| C14orf39    | AHSP       | AK5         | ANKRD35    | BHLHE22   | CACNA1D | CH25H   |
| C16orf95    | AIFM1      | ALDH1A3     | ANKRD43    | BHLHE23   | CACNA1E | CHRDL2  |
| C17orf47    | AIM1       | ALOX15      | APBA1      | BHLHE41   | CACNA1G | CHST8   |
| C1orf185    | AJAP1      | ALOX15P1    | AQP5       | BMP8A     | CACNG3  | CLSTN2  |
| C1QTNF1-AS1 | AK5        | ALOX5       | ARHGAP20   | BNC1      | CALCR   | COL27A1 |
| C1QTNF6     | ALDH1A2    | ALPL        | ARHGEF38   | BTG2      | CAMK2N1 | COL2A1  |
| C21orf49    | ALDH1A3    | ALX1        | ARHGEF7    | C13orf15  | CBLN1   | COLEC12 |
| C21orf90    | ALOX15     | ALX3        | ARID3C     | C17orf102 | CBX4    | COMP    |
| C2CD4B      | ALOX15P1   | ALX4        | ARID5B     | C17orf82  | CCNA1   | CRLF1   |
| C2orf71     | ALOX5      | AMZ1        | ARL10      | C1orf194  | CD34    | CRTAC1  |
| C2orf78     | ALPL       | ANAPC10     | ARL5C      | C1orf213  | CD38    | CRYBA2  |
| C3          | ALX1       | ANAPC15     | ARL9       | C20orf103 | CD70    | CSMD1   |
| C4BPA       | ALX3       | ANAPC1P1    | ARNTL      | C21orf63  | CD8A    | CSMD3   |
| C7orf50     | ALX4       | ANG         | ASCL1      | C2CD4A    | CDC20B  | CXCL16  |
| C7orf71     | AMER3      | ANGEL1      | ASCL2      | C3orf15   | CDH7    | CYP26A1 |
| C9orf53     | AMZ1       | ANK1        | ASCL4      | C4orf49   | CDK5R2  | CYP26B1 |
| CACNG2      | ANAPC10    | ANKH        | ASTN1      | C5orf39   | CDKN2C  | CYP27B1 |
| CALCA       | ANAPC15    | ANKRD18A    | ASTN2      | C8orf47   | CDX2    | DACH1   |
| CALHM2      | ANAPC1P1   | ANKRD18B    | ATF3       | CA10      | CERKL   | DACH2   |
| CAMK4       | ANG        | ANKRD18DP   | ATOH1      | CACNA1B   | CH25H   | DCC     |
| CAPN14      | ANGEL1     | ANKRD19P    | ATOH8      | CACNA1D   | CHD5    | DGKG    |
| CASC4       | ANK1       | ANKRD27     | ATP1A3     | CACNA1E   | CHN2    | DIO3    |
| CASP8       | ANKH       | ANKRD29     | AVPR1B     | CACNA1G   | CHRDL2  | DKK1    |
| CCDC112     | ANKRD18A   | ANKRD34B    | B4GALNT1   | CALCA     | CHST8   | DKK2    |
| CCDC140     | ANKRD18B   | ANKRD34C    | B4GALNT2   | CAMK2N1   | CLIC5   | DLL4    |
| CCL11       | ANKRD18DP  | ANKRD6      | BAI2       | CASZ1     | CLSTN2  | DLX1    |
| CCL20       | ANKRD19P   | ANKS1B      | BARHL1     | CBLN1     | CNTNAP5 | DLX2    |
| CCL27       | ANKRD27    | ANP32A-IT1  | BARHL2     | CBLN4     | COL12A1 | DLX3    |
| CCR6        | ANKRD29    | ANP32E      | BARX1      | CBR3      | COL27A1 | DLX4    |
| CD160       | ANKRD34B   | ANXA2       | BARX2      | CBX8      | COL2A1  | DMRT1   |
| CD300LB     | ANKRD34C   | ANXA2R      | BATF3      | CCDC140   | COLEC12 | DMRT2   |
| CELF2       | ANKRD6     | AP1M2       | BCAN       | CD34      | COMP    | DMRT3   |
| CEP85       | ANKS1B     | AP2B1       | BCL2       | CD70      | CR2     | DPF3    |
| CES3        | ANO2       | AP3B1       | BHLHE22    | CD8A      | CRLF1   | DRD5    |
| CHRNA3      | ANP32A-IT1 | APCDD1L     | BHLHE23    | CDH23     | CRTAC1  | DSC3    |
| CHRNB3      | ANP32E     | APCDD1L-AS1 | BHLHE41    | CDH7      | CRYBA2  | DSCAML1 |
| CLDN5       | ANXA2      | APOBEC3G    | BLVRB      | CDK5R2    | CSMD1   | DUOX1   |
| CLEC1B      | ANXA2R     | ARC         | BMP6       | CDKN2C    | CSMD2   | DUOXA1  |
| CNIH3       | AP1M2      | ARHGAP12    | BMP8A      | CDX2      | CSMD3   | ECEL1   |
| COL20A1     | AP2B1      | ARHGAP22    | BMX        | CGB7      | CWH43   | EGFL6   |
| COL25A1     | AP3B1      | ARHGAP27    | BNC1       | CGB8      | CXCL16  | EGR4    |



|          |             |          |           |         |         |         |
|----------|-------------|----------|-----------|---------|---------|---------|
| COL4A3   | APCDD1L     | ARHGAP30 | BTG2      | CH25H   | CYP26A1 | ELMOD1  |
| COL4A4   | APCDD1L-AS1 | ARHGAP6  | C11orf45  | CHODL   | CYP26B1 | EN1     |
| COL6A5   | APOBEC3G    | ARHGAP9  | C13orf15  | CHRD    | CYP27B1 | EN2     |
| COX16    | ARC         | ARHGEF15 | C14orf132 | CHRD2   | CYP2A13 | EPAS1   |
| CPO      | ARHGAP12    | ARID3C   | C17orf100 | CHST8   | DACH1   | EPHA5   |
| CRH      | ARHGAP22    | ARIH1    | C17orf102 | CIDEA   | DACH2   | ESPN    |
| CRHR2    | ARHGAP27    | ARL15    | C17orf82  | CITED1  | DCC     | ESX1    |
| CRISP3   | ARHGAP30    | ARNTL    | C1orf115  | CLCN5   | DCX     | FAM163A |
| CSH1     | ARHGAP6     | ARPP21   | C1orf194  | CLEC14A | DGKG    | FAM19A4 |
| CSTA     | ARHGAP9     | ARSG     | C1orf213  | CLSTN2  | DIO3    | FAM43B  |
| CTRB2    | ARHGEF15    | ARX      | C1orf51   | CMTM2   | DKK1    | FAM89A  |
| CWC25    | ARID3C      | ASCL2    | C1orf94   | CNNM1   | DKK2    | FBLN7   |
| CXorf28  | ARIH1       | ASCL3    | C1QL1     | CNRIP1  | DLK1    | FBXL8   |
| CXXC4    | ARL15       | ASCL4    | C1QTNF5   | CNTFR   | DLL4    | FEZF2   |
| CYMP     | ARNTL       | ASIC2    | C20orf103 | COL24A1 | DLX1    | FGF3    |
| CYP1B1   | ARPP21      | ASTN2    | C21orf63  | COL25A1 | DLX2    | FGF5    |
| CYP24A1  | ARSG        | ATF2     | C2CD4A    | COL27A1 | DLX3    | FGF9    |
| CYP2A6   | ARX         | ATF3     | C3orf15   | COL2A1  | DLX4    | FIGLA   |
| CYP2C9   | ASCL2       | ATG5     | C3orf54   | COL4A5  | DLX5    | FLI1    |
| CYP2F1   | ASCL3       | ATG9B    | C4orf49   | COL4A6  | DMRT1   | FLRT2   |
| CYP2S1   | ASCL4       | ATN1     | C5orf39   | COL9A2  | DMRT2   | FOXB1   |
| DCAKD    | ASIC2       | ATOH8    | C8orf47   | COLEC12 | DMRT3   | FOXD3   |
| DDC      | ASTN2       | ATP12A   | CA10      | COMP    | DPF3    | FOXD4L3 |
| DDX4     | ATF2        | ATP2A3   | CA7       | CORO6   | DPP6    | FOXD4L4 |
| DEFA1    | ATF3        | ATP2B1   | CACNA1A   | CRHR1   | DRD5    | FOXE1   |
| DEFA1B   | ATG5        | ATP2C2   | CACNA1B   | CRLF1   | DSC3    | FOXF1   |
| DEFA3    | ATG9B       | ATP5G3   | CACNA1D   | CRTAC1  | DSCAML1 | FOXG1   |
| DEFB104A | ATN1        | ATP5J    | CACNA1E   | CRYBA2  | DUOX1   | FOXL1   |
| DEFB104B | ATOH1       | ATP6V1C2 | CACNA1G   | CSMD1   | DUOXA1  | FOXL2   |
| DEFB107A | ATOH8       | ATP8B1   | CACNB3    | CSMD3   | EBF1    | FRMD3   |
| DEFB107B | ATP12A      | ATPIF1   | CACNB4    | CTNND2  | EBF3    | FZD10   |
| DEFB124  | ATP2A3      | AVPR1A   | CACNG3    | CXCL14  | ECEL1   | GABRA2  |
| DEFB136  | ATP2B1      | AVPR2    | CACNG8    | CXCL16  | EGFL6   | GABRA4  |
| DISC2    | ATP2C2      | B3GNT1   | CADM4     | CYP24A1 | EGFLAM  | GAD2    |
| DLX6-AS1 | ATP5G3      | B3GNT3   | CALCA     | CYP26A1 | EGR4    | GALR2   |
| DMKN     | ATP5J       | B3GNT4   | CALCR     | CYP26B1 | EIF4E3  | GATA3   |
| DNM1P35  | ATP6V1C2    | B3GNT7   | CAMK2B    | CYP26C1 | ELAVL2  | GATA4   |
| DNMT3L   | ATP8B1      | BAG3     | CAMK2N1   | CYP27B1 | ELMOD1  | GATA6   |
| DOCK2    | ATPIF1      | BAG4     | CAMK2N2   | DACH1   | ELOVL3  | GBX2    |
| DRP2     | ATXN7L2     | BAIAP3   | CASZ1     | DACH2   | EN1     | GDF6    |
| DUOX2    | AVPR1A      | BAMBI    | CBLN1     | DCC     | EN2     | GDF7    |
| DUOXA2   | AVPR2       | BANCR    | CBLN4     | DCHS2   | EPAS1   | GHR     |
| DYSF     | B3GNT1      | BARHL1   | CBR3      | DCLK2   | EPHA10  | GHSR    |
| ECRP     | B3GNT3      | BARHL2   | CBX4      | DDAH1   | EPHA3   | GJB2    |
| EDIL3    | B3GNT4      | BARX2    | CBX8      | DGKG    | EPHA5   | GJD2    |

|            |                  |                    |         |           |         |          |
|------------|------------------|--------------------|---------|-----------|---------|----------|
| EOMES      | B3GNT7           | BATF3              | CCDC140 | DGKI      | ESPN    | GPR101   |
| ERICH1-AS1 | B4GALNT2         | BAZ2A              | CCDC50  | DHH       | ESR1    | GPR88    |
| ESRRG      | BAG3             | BCL2L11            | CCDC96  | DIO3      | ESX1    | GRIA2    |
| EVA1A      | BAG4             | BCL7A              | CCNA1   | DKK1      | FAM163A | GRID1    |
| EVX1       | BAIAP3           | BDNF               | CD34    | DKK2      | FAM19A4 | GRIK3    |
| EXOC3L2    | BAMBI            | BEAN1              | CD38    | DLL4      | FAM43B  | GRM7     |
| FABP4      | BANCR            | BEGAIN             | CD47    | DLX1      | FAM89A  | GSC      |
| FAHD1      | BARHL1           | BEND4              | CD70    | DLX2      | FBLN7   | GSC2     |
| FAIM       | BARHL2           | BEST2              | CD8A    | DLX3      | FBXL8   | GSX1     |
| FAM138A    | BARX1            | BHLHE23            | CDC20B  | DLX4      | FERD3L  | HAND2    |
| FAM138B    | BARX2            | BHMT               | CDH23   | DMRT1     | FEZF2   | HES2     |
| FAM138C    | BASP1            | BLACE              | CDH4    | DMRT2     | FGF3    | HHEX     |
| FAM138F    | BATF3            | BLK                | CDH6    | DMRT3     | FGF5    | HLX      |
| FAM150A    | BAZ2A            | BLOC1S1            | CDH7    | DNAJC22   | FGF8    | HMX2     |
| FAM159B    | BCL2L11          | BLOC1S1-<br>RDH5   | CDK5R2  | DOK6      | FGF9    | HMX3     |
| FAM172BP   | BCL7A            | BMP2               | CDKN2C  | DPF3      | FIGLA   | HOXB3    |
| FAM177B    | BCL9             | BMP3               | CDX1    | DPY19L2   | FLI1    | HOXB7    |
| FAM180A    | BDNF             | BMP6               | CDX2    | DPY19L2P2 | FLRT2   | HOXB8    |
| FAM194B    | BEAN1            | BMP8B              | CERKL   | DRD5      | FNDC1   | HOXC6    |
| FAM72D     | BEGAIN           | BMPER              | CGB7    | DSC3      | FOXB1   | HOXD13   |
| FAM99B     | BEND4            | BNC2               | CGB8    | DSCAML1   | FOXC1   | HOXD8    |
| FBXL21     | BEST2            | BNIP2              | CH25H   | DUOX1     | FOXD3   | HOXD9    |
| FBXO31     | BHLHE22          | BOD1L1             | CHAD    | DUOX2     | FOXD4L3 | HPSE2    |
| FCGR1C     | BHLHE23          | BRDT               | CHD5    | DUOXA1    | FOXD4L4 | HRK      |
| FCGR2A     | BHMT             | BRE                | CHDH    | DUOXA2    | FOXE1   | HS3ST3B1 |
| FCGR3A     | BLACE            | BRINP2             | CHN2    | DUSP4     | FOXE3   | HS6ST3   |
| FEV        | BLK              | BRINP3             | CHODL   | ECEL1     | FOXF1   | HSF4     |
| FFAR1      | BLOC1S1          | BRIX1              | CHRDL   | EFNA1     | FOXF2   | HTR1A    |
| FGF4       | BLOC1S1-<br>RDH5 | BRWD3              | CHRDL1  | EFNA3     | FOXG1   | ICAM5    |
| FLI1-AS1   | BMP2             | BSPRY              | CHRDL2  | EGFL6     | FOXL1   | IGF2-AS  |
| FLJ23867   | BMP3             | BSX                | CHST8   | EGR3      | FOXL2   | IKZF3    |
| FLJ36000   | BMP4             | BTBD1              | CIDEA   | EGR4      | FOXQ1   | IL1RAPL2 |
| FMO5       | BMP6             | BTG4               | CITED1  | ELMOD1    | FRMD3   | IL7      |
| FOLR1      | BMP8B            | BTN1A1             | CLCN5   | EN1       | FRMPD1  | INSRR    |
| FOXA2      | BMPER            | BTNL9              | CLEC14A | EN2       | FXYD7   | IRX3     |
| FOXD2      | BNC1             | BUB3               | CLEC4G  | EOMES     | FZD10   | IRX5     |
| FOXD4L1    | BNC2             | C10orf131          | CLIC5   | EPAS1     | GAB3    | ISL1     |
| GABRA1     | BNIP2            | C10orf32           | CLIP4   | EPB41L4A  | GABRA2  | ITGA4    |
| GAL3ST1    | BOD1L1           | C10orf32-<br>AS3MT | CLSTN2  | EPHA5     | GABRA4  | ITPKA    |
| GALNTL6    | BRDT             | C10orf55           | CMTM2   | EPHB1     | GABRB2  | KCNA1    |
| GATA2      | BRE              | C10orf67           | CNNM1   | EPHB3     | GAD2    | KCNAB1   |
| GBA        | BRINP2           | C10orf88           | CNNM2   | ERBB4     | GALR2   | KCNC4    |
| GBA3       | BRINP3           | C11orf44           | CNRIP1  | ESAM      | GATA3   | KCNK12   |
| GDNF       | BRIX1            | C11orf70           | CNTFR   | ESPN      | GATA4   | KCNK13   |

|            |                    |               |         |          |        |           |
|------------|--------------------|---------------|---------|----------|--------|-----------|
| GDNF-AS1   | BRWD3              | C11orf74      | CNTN2   | ESX1     | GATA6  | KCNK2     |
| GFI1       | BSND               | C11orf88      | CNTNAP5 | F2R      | GBX2   | KCNK4     |
| GFOD1      | BSPRY              | C14orf119     | COL12A1 | FAM150A  | GCM2   | KCNMA1    |
| GIPC2      | BSX                | C14orf132     | COL24A1 | FAM163A  | GDF6   | KCNQ3     |
| GJA4       | BTAF1              | C16orf11      | COL25A1 | FAM19A4  | GDF7   | KCNV1     |
| GKN2       | BTBD1              | C16orf13      | COL27A1 | FAM43B   | GHR    | KIAA1324  |
| GLIS1      | BTBD11             | C17orf102     | COL2A1  | FAM5B    | GHSR   | KIRREL3   |
| GLOD5      | BTG4               | C17orf82      | COL4A5  | FAM5C    | GJB2   | KL        |
| GLUD2      | BTN1A1             | C18orf42      | COL4A6  | FAM81A   | GJD2   | KLF4      |
| GPR4       | BTNL9              | C19orf33      | COL8A1  | FAM84A   | GPR101 | KLHL35    |
| GPR68      | BUB3               | C19orf59      | COL9A2  | FAM89A   | GPR26  | LBX1      |
| GPR83      | C10orf131          | C1orf110      | COLEC12 | FBLN7    | GPR88  | LGR5      |
| GPRIN2     | C10orf32           | C1orf170      | COMMD3  | FBN2     | GRIA2  | LHX2      |
| GRHL3      | C10orf32-<br>AS3MT | C1orf172      | COMP    | FBP1     | GRID1  | LHX4      |
| GRIN3A     | C10orf55           | C1orf194      | CORO6   | FBXL8    | GRIK3  | LHX5      |
| GRM4       | C10orf67           | C1orf200      | COX6B2  | FBXO3    | GRIN1  | LMX1B     |
| GSN        | C10orf88           | C1orf210      | CPM     | FEV      | GRM6   | LOC153684 |
| GSN-AS1    | C11orf44           | C1orf213      | CR2     | FEZ1     | GRM7   | LONRF3    |
| GSX2       | C11orf70           | C1orf27       | CRH     | FEZF2    | GSC    | LPL       |
| GUCY1A3    | C11orf74           | C1orf53       | CRHR1   | FGF20    | GSC2   | LRRC71    |
| GZMA       | C11orf88           | C1orf61       | CRIP1   | FGF3     | GSX1   | LTBP2     |
| H1FOO      | C14orf119          | C1orf74       | CRLF1   | FGF5     | HAND1  | LTK       |
| H2AFX      | C14orf132          | C1orf94       | CRMP1   | FGF9     | HAND2  | LYSMD2    |
| HAGH       | C14orf23           | C1QC          | CRTAC1  | FIGLA    | HCN4   | MAB21L1   |
| HBA1       | C14orf39           | C1QL1         | CRYBA2  | FLI1     | HES2   | MAB21L2   |
| HBA2       | C16orf11           | C1QL2         | CRYL1   | FLJ11235 | HES3   | MAFB      |
| HCG11      | C16orf13           | C1QL3         | CSF1    | FLJ32063 | HHEX   | MAL       |
| HCK        | C16orf95           | C1QL4         | CSMD1   | FLJ45983 | HLX    | MCOLN3    |
| HEMGN      | C17orf102          | C1QTNF1       | CSMD2   | FLJ46347 | HMX2   | MESP1     |
| HEPHL1     | C17orf82           | C20orf166     | CSMD3   | FLRT2    | HMX3   | MKX       |
| HES5       | C18orf42           | C20orf166-AS1 | CTNND2  | FOXA2    | HOXA1  | MSC       |
| HHIPL1     | C19orf33           | C20orf201     | CWH43   | FOXB1    | HOXA2  | MSX1      |
| HIGD1B     | C19orf59           | C2CD4A        | CXCL14  | FOXD2    | HOXA4  | MT1A      |
| HIST1H1A   | C1orf110           | C3orf58       | CXCL16  | FOXD3    | HOXA6  | MT1B      |
| HIST1H1D   | C1orf170           | C3orf72       | CYP24A1 | FOXD4L1  | HOXB3  | MT1DP     |
| HIST1H4H   | C1orf172           | C3orf80       | CYP26A1 | FOXD4L3  | HOXB7  | MT1H      |
| HIST2H2AA3 | C1orf194           | C3orf84       | CYP26B1 | FOXD4L4  | HOXB8  | MT1M      |
| HIST2H2AA4 | C1orf200           | C4orf19       | CYP26C1 | FOX E1   | HOXC6  | MYO5B     |
| HIST2H2BC  | C1orf210           | C4orf32       | CYP27B1 | FOXF1    | HOXD13 | MYOD1     |
| HMBOX1     | C1orf213           | C5orf38       | CYP2A13 | FOXG1    | HOXD8  | NAGS      |
| HMGCLL1    | C1orf27            | C7orf43       | CYP2A6  | FOXJ1    | HOXD9  | NEFL      |
| HNF1B      | C1orf53            | C8orf31       | CYP2A7  | FOXL1    | HPSE   | NELL1     |
| HNRNPCP5   | C1orf61            | C8orf37       | CYP2J2  | FOXL2    | HPSE2  | NEUROD2   |
| HOMER1     | C1orf74            | C9orf3        | CYP39A1 | FRMD3    | HR     | NEUROG1   |
| HOTAIR     | C1orf94            | C9orf66       | DACH1   | FRMPD4   | HRK    | NEUROG2   |

|                  |               |             |           |         |             |           |
|------------------|---------------|-------------|-----------|---------|-------------|-----------|
| HOTTIP           | C1QC          | CA1         | DACH2     | FUT4    | HS3ST2      | NEUROG3   |
| HOXA10           | C1QL1         | CA10        | DCC       | FZD10   | HS3ST3B1    | NKX2-1    |
| HOXA10-<br>HOXA9 | C1QL2         | CA14        | DCHS2     | FZD2    | HS3ST4      | NKX2-2    |
| HOXA11           | C1QL3         | CA4         | DCLK1     | GABRA2  | HS6ST3      | NKX2-3    |
| HOXA13           | C1QL4         | CA7         | DCLK2     | GABRA4  | HSF4        | NKX2-8    |
| HOXA3            | C1QTNF1       | CA8         | DCX       | GAD2    | HTR1A       | NKX3-1    |
| HOXA7            | C20orf166     | CABLES1     | DDAH1     | GALNTL4 | HTR6        | NKX3-2    |
| HOXA9            | C20orf166-AS1 | CABP7       | DDX25     | GALR2   | ICAM5       | NKX6-1    |
| HOXA-AS3         | C20orf201     | CACNA1A     | DGKG      | GATA2   | IGF2-AS     | NKX6-2    |
| HOXA-AS4         | C21orf49      | CACNA1B     | DGKI      | GATA3   | IGFBP3      | NPAS1     |
| HOXB1            | C2CD4A        | CACNA1D     | DHH       | GATA4   | IHH         | NPAS4     |
| HOXB13           | C2CD4B        | CACNA1E     | DIO3      | GATA6   | IKZF3       | NPNT      |
| HOXB2            | C2orf78       | CACNA1G     | DKK1      | GBX2    | IL10RA      | NPR3      |
| HOXB4            | C3orf58       | CACNA1G-AS1 | DKK2      | GDF6    | IL1RAPL2    | NPTX1     |
| HOXB5            | C3orf72       | CACNA2D3    | DLK1      | GDF7    | IL7         | NR2F2     |
| HOXB6            | C3orf80       | CACNG3      | DLK2      | GDNF    | INSRR       | NRG2      |
| HOXB-AS1         | C3orf84       | CACNG6      | DLL4      | GHR     | IRX1        | NTNG2     |
| HOXB-AS3         | C4orf19       | CALCR       | DLX1      | GHSR    | IRX3        | NTRK1     |
| HOXC11           | C4orf32       | CALM1       | DLX2      | GIMAP5  | IRX5        | OLIG2     |
| HOXC12           | C5orf38       | CALN1       | DLX3      | GJB2    | ISL1        | ONECUT1   |
| HOXC13           | C7orf43       | CALY        | DLX4      | GJD2    | ITGA4       | ONECUT2   |
| HOXC4            | C8orf31       | CAMK2N1     | DLX5      | GLT25D2 | ITIH5       | OPRD1     |
| HOXC5            | C8orf37       | CAMP        | DMRT1     | GNA14   | ITPKA       | OSR1      |
| HOXC8            | C9orf3        | CAMTA1      | DMRT2     | GPC5    | KCNA1       | OTOP1     |
| HOXC-AS2         | C9orf53       | CAND1.11    | DMRT3     | GPM6B   | KCNA5       | OTOP2     |
| HOXC-AS5         | C9orf66       | CARTPT      | DNAJC22   | GPR101  | KCNAB1      | OTOP3     |
| HOXD1            | CA1           | CASR        | DNER      | GPR12   | KCNC4       | OTP       |
| HOXD10           | CA10          | CAST        | DOK6      | GPR88   | KCNIP4      | OTX1      |
| HOXD12           | CA14          | CBLN1       | DPF3      | GRIA2   | KCNK12      | OTX2      |
| HOXD3            | CA4           | CBWD1       | DPP6      | GRID1   | KCNK13      | PABPC1L2A |
| HOXD4            | CA7           | CBWD2       | DPY19L2   | GRIK1   | KCNK17      | PAPPA     |
| HPGDS            | CA8           | CBWD3       | DPY19L2P2 | GRIK3   | KCNK2       | PAX1      |
| HS3ST1           | CABLES1       | CBWD5       | DPYSL5    | GRIN3A  | KCNK4       | PAX2      |
| HSPA5            | CABP7         | CBWD6       | DRD4      | GRM7    | KCNMA1      | PAX8      |
| HSPA6            | CACNA1A       | CBX4        | DRD5      | GSC     | KCNQ1       | PAX9      |
| HTR2C            | CACNA1B       | CCBE1       | DSC3      | GSC2    | KCNQ3       | PCDH8     |
| HYLS1            | CACNA1D       | CCDC108     | DSCAML1   | GSX1    | KCNS2       | PDGFRA    |
| ICAM2            | CACNA1E       | CCDC129     | DTNB      | GSX2    | KCNS3       | PDX1      |
| ICAM4            | CACNA1G       | CCDC17      | DUOX1     | GUCY1A3 | KCNV1       | PENK      |
| IFNK             | CACNA1G-AS1   | CCDC3       | DUOX2     | GUCY2D  | KIAA1324    | PGM5      |
| IGF2             | CACNA2D3      | CCDC59      | DUOXA1    | HAND2   | KIRREL3     | PGR       |
| IGFN1            | CACNG2        | CCDC64B     | DUOXA2    | HBA1    | KIRREL3-AS3 | PHOX2A    |
| IGLL5            | CACNG3        | CCDC68      | DUSP15    | HBA2    | KISS1R      | PITX3     |
| IGSF21           | CACNG6        | CCDC71      | DUSP4     | HES2    | KL          | PMP22     |
| IL21R            | CALCA         | CCDC84      | DUSP6     | HES7    | KLF4        | POU3F4    |

|              |          |            |          |          |           |         |
|--------------|----------|------------|----------|----------|-----------|---------|
| IL23A        | CALCR    | CCK        | DUSP8    | HEY1     | KLHL35    | POU4F1  |
| IL32         | CALM1    | CCL4       | DYNC1I1  | HHAT     | KLK4      | POU4F2  |
| INTS9        | CALN1    | CCNA1      | EBF1     | HHEX     | LAMB1     | POU4F3  |
| IQCF4        | CALY     | CCND2      | EBF3     | HHIP     | LBX1      | PRDM12  |
| IRF4         | CAMK2N1  | CCNO       | ECEL1    | HLX      | LEF1      | PRLHR   |
| IRX4         | CAMP     | CCNYL1     | EFCAB1   | HMX2     | LGI3      | PROK2   |
| ISL2         | CAMTA1   | CCT6B      | EFNA1    | HMX3     | LGR5      | PTF1A   |
| ITGB2        | CAND1.11 | CCZ1B      | EFNA3    | HNF1B    | LHFPL3    | PTGDR   |
| KDR          | CARTPT   | CD1D       | EGFL6    | HOXB1    | LHX2      | PTGER2  |
| KIAA1217     | CASC4    | CD200R1L   | EGFLAM   | HOXB13   | LHX3      | PTGER3  |
| KIAA1239     | CASR     | CD24       | EGR2     | HOXB2    | LHX4      | PTGER4  |
| KIR3DX1      | CAST     | CD300LF    | EGR3     | HOXB3    | LHX5      | PTH2    |
| KISS1        | CBLN1    | CD302      | EGR4     | HOXB6    | LMX1B     | PTHLH   |
| KLF14        | CBWD1    | CD34       | EIF4E3   | HOXB7    | LOC153684 | PTPRT   |
| KNCN         | CBWD2    | CD38       | ELAVL2   | HOXB8    | LONRF3    | PYY     |
| KPNA2        | CBWD3    | CD4        | ELAVL3   | HOXC11   | LPL       | RAB6C   |
| KRT12        | CBWD5    | CD44       | ELMOD1   | HOXC12   | LRRC71    | RASGRF1 |
| KRT34        | CBWD6    | CD70       | ELOVL2   | HOXC4    | LTBP2     | RASSF5  |
| KRT76        | CBX4     | CD8A       | ELOVL3   | HOXC5    | LTK       | RAX     |
| KRTAP13-2    | CCBE1    | CD8B       | EN1      | HOXC6    | LYSMD2    | RBP4    |
| KRTAP4-2     | CCDC108  | CDA        | EN2      | HOXC8    | MAB21L1   | RGS10   |
| L1TD1        | CCDC129  | CDC20B     | ENTPD2   | HOXD1    | MAB21L2   | RGS9BP  |
| LAMA3        | CCDC140  | CDC5L      | ENTPD3   | HOXD12   | MAFB      | RIPK3   |
| LBX2         | CCDC17   | CDCA5      | EOMES    | HOXD13   | MAL       | RSPO2   |
| LEUTX        | CCDC3    | CDCP1      | EPAS1    | HOXD3    | MCOLN3    | SCTR    |
| LHX6         | CCDC59   | CDH13      | EPB41L4A | HOXD4    | MECOM     | SFRP1   |
| LHX8         | CCDC64B  | CDH15      | EPHA10   | HOXD8    | MEIS1     | SFRP5   |
| LILRA5       | CCDC68   | CDH22      | EPHA3    | HOXD9    | MEOX2     | SGPP2   |
| LILRB2       | CCDC71   | CDH7       | EPHA4    | HPCAL4   | MESP1     | SHH     |
| LINC00111    | CCDC84   | CDK5R2     | EPHA5    | HPSE2    | MFSD4     | SHISA6  |
| LINC00489    | CCK      | CDKN2A     | EPHB1    | HRK      | MICB      | SHOX    |
| LINC00554    | CCL11    | CDKN2B     | EPHB3    | HS3ST3B1 | MKX       | SHOX2   |
| LINC00861    | CCL4     | CDKN2B-AS1 | ERBB4    | HS6ST1P1 | MLPH      | SIDT1   |
| LINC00900    | CCNA1    | CDKN2C     | ERO1LB   | HS6ST3   | MLXIPL    | SIM2    |
| LINC00910    | CCND2    | CDX2       | ESAM     | HSF4     | MSC       | SIX1    |
| LINC00942    | CCNO     | CEACAM19   | ESPN     | HSPA6    | MSX1      | SIX2    |
| LINC01020    | CCNYL1   | CEP192     | ESR1     | HTR1A    | MSX2      | SIX3    |
| LINC01056    | CCT6B    | CEP85L     | ESX1     | HTR2C    | MT1A      | SLC1A2  |
| LIPC         | CCZ1B    | CERKL      | ETV7     | HTR7     | MT1B      | SLC24A4 |
| LMF1         | CD1D     | CFTR       | EVX1     | ICAM5    | MT1DP     | SLC30A2 |
| LOC100128239 | CD200R1L | CH25H      | EXOC3L2  | IGF2-AS  | MT1H      | SLC30A3 |
| LOC100132174 | CD24     | CHAT       | EYA4     | IGSF21   | MT1M      | SLC32A1 |
| LOC100289473 | CD300LF  | CHD5       | F2R      | IKZF3    | MYO5B     | SLC35F3 |
| LOC100506178 | CD302    | CHN2       | FAM115C  | IL1RAPL2 | MYOD1     | SLC6A1  |
| LOC100506241 | CD34     | CHRD12     | FAM123A  | IL7      | NAGS      | SLC6A3  |

|              |            |           |          |           |         |          |
|--------------|------------|-----------|----------|-----------|---------|----------|
| LOC100506730 | CD38       | CHRM2     | FAM129A  | ILDR2     | NCCRP1  | SLC6A5   |
| LOC100507003 | CD4        | CHST13    | FAM150A  | INA       | NDRG1   | SLC9A2   |
| LOC100507489 | CD44       | CHST8     | FAM159A  | INSM2     | NEFH    | SLC9A3   |
| LOC100652768 | CD70       | CISTR-ACT | FAM163A  | INSRR     | NEFL    | SLCO5A1  |
| LOC100996758 | CD8A       | CKMT1A    | FAM167A  | IRX3      | NELL1   | SLFN11   |
| LOC148696    | CD8B       | CLDN14    | FAM19A4  | IRX4      | NEUROD2 | SLITRK3  |
| LOC150622    | CDA        | CLDN7     | FAM43B   | IRX5      | NEUROG1 | SORCS1   |
| LOC152586    | CDC20B     | CLEC2L    | FAM5B    | ISL1      | NEUROG2 | SORCS3   |
| LOC284757    | CDC5L      | CLEC4GP1  | FAM5C    | ISL2      | NEUROG3 | SOX14    |
| LOC285696    | CDCA5      | CLIC5     | FAM70B   | ITGA4     | NGF     | SOX17    |
| LOC286094    | CDCP1      | CLIC6     | FAM78A   | ITPKA     | NGFR    | SOX7     |
| LOC286297    | CDH13      | CLNS1A    | FAM81A   | JUN       | NKX2-1  | SPAG6    |
| LOC286437    | CDH15      | CLOCK     | FAM84A   | KAZALD1   | NKX2-2  | SPON1    |
| LOC339240    | CDH22      | CLSTN2    | FAM89A   | KCNA1     | NKX2-3  | SRD5A2   |
| LOC340073    | CDH7       | CLTC      | FBLN5    | KCNA3     | NKX2-5  | SSTR2    |
| LOC389033    | CDK5R2     | CLVS2     | FBLN7    | KCNAB1    | NKX2-8  | STMN2    |
| LOC641515    | CDKN2A     | CMA1      | FBN1     | KCNC2     | NKX3-1  | SUSD4    |
| LOC643802    | CDKN2B     | CMTM7     | FBN2     | KCNC4     | NKX3-2  | SV2B     |
| LOC727924    | CDKN2B-AS1 | CMTR1     | FBP1     | KCND3     | NKX6-1  | TBR1     |
| LOC729218    | CDKN2C     | CNGA3     | FBXL14   | KCNH1     | NKX6-2  | TBX1     |
| LOC729737    | CDX2       | CNOT2     | FBXL8    | KCNH3     | NOTUM   | TBX2     |
| LPAR3        | CEACAM19   | CNPY1     | FBXO25   | KCNK12    | NPAS1   | TBX3     |
| LRRC26       | CELF2      | CNTNAP5   | FBXO3    | KCNK13    | NPAS4   | THBD     |
| LRRC72       | CEP192     | COL12A1   | FERD3L   | KCNK2     | NPNT    | TLL1     |
| LRTM1        | CEP85      | COL14A1   | FEV      | KCNK4     | NPR1    | TLX1     |
| LRTM2        | CEP85L     | COL15A1   | FEZ1     | KCNMA1    | NPR3    | TLX2     |
| LTBP1        | CERKL      | COL21A1   | FEZF2    | KCNQ3     | NPTX1   | TMEM132E |
| LTF          | CFTR       | COL27A1   | FGF11    | KCNV1     | NPY5R   | TMEM30B  |
| LYZL6        | CH25H      | COL2A1    | FGF20    | KIAA1199  | NR2E1   | TMEM59L  |
| LZTS1-AS1    | CHAT       | COL5A3    | FGF3     | KIAA1324  | NR2F2   | TMOD2    |
| MALL         | CHD5       | COLEC12   | FGF5     | KIRREL3   | NRG2    | TP73     |
| MAPRE3       | CHN2       | COMMMD4   | FGF8     | KL        | NRIP3   | TRADD    |
| MAST4        | CHRD2      | COMP      | FGF9     | KLF4      | NRN1    | TRH      |
| MEP1A        | CHRM2      | COPS7A    | FIGLA    | KLHL35    | NRXN1   | TRIM36   |
| MIR10A       | CHRNA3     | CPAMD8    | FLI1     | KY        | NTNG2   | TRIM67   |
| MIR10B       | CHST13     | CPLX2     | FLJ11235 | LAYN      | NTRK1   | TRPC5    |
| MIR1-1       | CHST8      | CPNE1     | FLJ32063 | LBX1      | NXPH4   | TSLP     |
| MIR1252      | CISTR-ACT  | CPNE7     | FLJ39739 | LGALS3    | OLIG2   | UCN      |
| MIR1258      | CKMT1A     | CPT1A     | FLJ45983 | LGR5      | OLIG3   | UCP1     |
| MIR196A1     | CLDN14     | CPXM2     | FLJ46347 | LHX2      | ONECUT1 | UNC5C    |
| MIR196A2     | CLDN7      | CPZ       | FLRT2    | LHX4      | ONECUT2 | USH1G    |
| MIR196B      | CLEC2L     | CR1       | FNDC1    | LHX5      | OPRD1   | VAX1     |
| MIR200B      | CLEC4GP1   | CR2       | FNDC5    | LHX6      | OSR1    | VAX2     |
| MIR206       | CLIC5      | CRABP1    | FOXA2    | LHX8      | OSR2    | VDR      |
| MIR3131      | CLIC6      | CRB3      | FOXB1    | LINC00268 | OTOP1   | WNT1     |

|          |         |            |         |           |           |         |
|----------|---------|------------|---------|-----------|-----------|---------|
| MIR3185  | CLNS1A  | CREB3L2    | FOXC1   | LMX1B     | OTOP2     | WNT10A  |
| MIR3646  | CLOCK   | CREG2      | FOXD2   | LOC153684 | OTOP3     | WNT11   |
| MIR3907  | CLSTN2  | CRHBP      | FOXD3   | LONRF3    | OTP       | WNT2    |
| MIR4276  | CLTC    | CRIM1      | FOXD4L1 | LPHN3     | OTX1      | WNT3A   |
| MIR4420  | CLVS2   | CRLF1      | FOXD4L3 | LPL       | OTX2      | WNT6    |
| MIR4423  | CMA1    | CRNDE      | FOXD4L4 | LPPR1     | OVOL1     | WNT7A   |
| MIR4461  | CMTM7   | CRTAC1     | FOXE1   | LRCH2     | PABPC1L2A | WRAP73  |
| MIR4493  | CMTR1   | CRYBA2     | FOXE3   | LRFN5     | PADI2     | ZCCHC16 |
| MIR4713  | CNGA3   | CRYM       | FOXF1   | LRP2      | PAPPA     | ZFH3    |
| MIR4727  | CNIH3   | CSE1L      | FOXF2   | LRRC71    | PAX1      | ZFYVE28 |
| MIR4730  | CNOT2   | CSGALNACT1 | FOXG1   | LRRTM1    | PAX2      | ZIC1    |
| MIR4778  | CNPY1   | CSMD1      | FOXJ1   | LTBP2     | PAX8      | ZIC4    |
| MIR4801  | CNTNAP5 | CSMD2      | FOXL1   | LTK       | PAX9      | ZMYND15 |
| MIR5092  | COL12A1 | CSMD3      | FOXL2   | LYSMD2    | PCDH8     | ZNF436  |
| MIR5093  | COL14A1 | CSRNP2     | FOXQ1   | MAB21L1   | PCSK2     | ZNF503  |
| MIR5188  | COL15A1 | CSRP2      | FRAT1   | MAB21L2   | PDGFRA    |         |
| MIR518B  | COL21A1 | CTAGE11P   | FRMD3   | MAFB      | PDX1      |         |
| MIR520C  | COL25A1 | CTDSP1     | FRMPD1  | MAL       | PENK      |         |
| MIR520G  | COL27A1 | CTSE       | FRMPD4  | MAPK4     | PGM5      |         |
| MIR520H  | COL2A1  | CUX2       | FUCA1   | MAPT      | PGR       |         |
| MIR663A  | COL4A3  | CWC15      | FUT4    | MCOLN3    | PHOX2A    |         |
| MIR888   | COL4A4  | CWH43      | FUT9    | MESP1     | PITX3     |         |
| MIR890   | COL5A3  | CXCL12     | FXYD7   | METRNL    | PMP22     |         |
| MIR891A  | COL6A5  | CXCL16     | FZD1    | MGC39545  | POMC      |         |
| MNX1     | COLEC12 | CXCL6      | FZD10   | MIR137HG  | POU3F4    |         |
| MRGPRX4  | COMMD4  | CYB5R2     | FZD2    | MKX       | POU4F1    |         |
| MROH5    | COMP    | CYP11B1    | GAB3    | MLLT3     | POU4F2    |         |
| MS4A10   | COPS7A  | CYP26A1    | GABBR2  | MNX1      | POU4F3    |         |
| MSGN1    | COX16   | CYP26B1    | GABRA2  | MSC       | PPP1R14C  |         |
| MSX2P1   | CPAMD8  | CYP27B1    | GABRA4  | MSX1      | PRDM12    |         |
| MT1G     | CPLX2   | CYP2A13    | GABRB2  | MT1A      | PRDM13    |         |
| MT1L     | CPNE1   | CYP4F2     | GABRG3  | MT1B      | PRKCB     |         |
| MTFR1    | CPNE7   | CYP4X1     | GAD2    | MT1DP     | PRKCH     |         |
| MTHFSD   | CPT1A   | CYS1       | GALNTL1 | MT1H      | PRLHR     |         |
| MTRNR2L7 | CPXM2   | DACH1      | GALNTL4 | MT1M      | PROK2     |         |
| MUC12    | CPZ     | DACH2      | GALR2   | MYF6      | PRUNE2    |         |
| MUC13    | CR1     | DACT1      | GAST    | MYO5B     | PSD2      |         |
| MYH4     | CR2     | DBX1       | GATA2   | MYOD1     | PTF1A     |         |
| MYL3     | CRABP1  | DBX2       | GATA3   | NAGS      | PTGDR     |         |
| MYOM2    | CRB3    | DCC        | GATA4   | NAV2      | PTGER2    |         |
| MYOT     | CREB3L2 | DCX        | GATA6   | NBPF11    | PTGER3    |         |
| NAA30    | CREG2   | DDX17      | GBX2    | NCAM1     | PTGER4    |         |
| NASP     | CRHBP   | DDX51      | GCC1    | NDUFA4L2  | PTH2      |         |
| NDRG4    | CRHR2   | DEFB119    | GCM2    | NEFL      | PTHLH     |         |
| NEBL     | CRIM1   | DEGS2      | GDF6    | NEFM      | PTPRT     |         |

|           |            |                   |         |         |         |
|-----------|------------|-------------------|---------|---------|---------|
| NEUROD1   | CRLF1      | DENND6A           | GDF7    | NELL1   | PYY     |
| NEUROD4   | CRNDE      | DGKG              | GDNF    | NEUROD1 | RAB6C   |
| NFIX      | CRTAC1     | DGKK              | GHR     | NEUROD2 | RASGRF1 |
| NFS1      | CRYBA2     | DHDDS             | GHSR    | NEUROG1 | RASSF5  |
| NMT1      | CRYM       | DHDH              | GIMAP5  | NEUROG2 | RAX     |
| NOTO      | CSE1L      | DIO3              | GJB2    | NEUROG3 | RBP4    |
| NPAS3     | CSGALNACT1 | DKFZP434I071<br>4 | GJD2    | NFIX    | RBP7    |
| NPFFR1    | CSMD1      | DKFZp686K168<br>4 | GKAP1   | NKX2-1  | REEP1   |
| NPY4R     | CSMD2      | DKK1              | GLB1L2  | NKX2-2  | RFX6    |
| NR2F1     | CSMD3      | DKK2              | GLIPR2  | NKX2-3  | RGS10   |
| NR2F1-AS1 | CSRNP2     | DLK1              | GLT25D2 | NKX2-8  | RGS9BP  |
| NSG1      | CSRP2      | DLL1              | GNA14   | NKX3-1  | RIPK3   |
| NUBPL     | CTAGE11P   | DLL4              | GNAO1   | NKX3-2  | RSPO2   |
| NXPE2     | CTDSP1     | DLX1              | GPC3    | NKX6-1  | RSPO3   |
| OAZ3      | CTSE       | DLX2              | GPC5    | NKX6-2  | RTBDN   |
| OCA2      | CUX2       | DLX3              | GPD1L   | NOL4    | SAMD11  |
| OLFM3     | CWC15      | DLX4              | GPM6B   | NPAS1   | SCTR    |
| OLFM4     | CWC25      | DLX5              | GPR101  | NPAS4   | SEZ6    |
| OPALIN    | CWH43      | DLX6              | GPR12   | NPNT    | SFRP1   |
| OR10J1    | CXCL12     | DMBT1             | GPR124  | NPR3    | SFRP5   |
| OR11H6    | CXCL16     | DMRT1             | GPR150  | NPTX1   | SFTPC   |
| OR13C8    | CXCL6      | DMRT2             | GPR174  | NPY1R   | SGPP2   |
| OR1I1     | CXXC4      | DMRT3             | GPR26   | NR2F2   | SH3GL2  |
| OR1J4     | CYB5R2     | DMRTA2            | GPR6    | NR4A3   | SHH     |
| OR1L3     | CYP11B1    | DNAH11            | GPR62   | NRG1    | SHISA6  |
| OR1N1     | CYP1B1     | DNAJB11           | GPR88   | NRG2    | SHOX    |
| OR2A5     | CYP24A1    | DNTT              | GRB10   | NT5C1A  | SHOX2   |
| OR4B1     | CYP26A1    | DOC2B             | GRHL3   | NTN1    | SIDT1   |
| OR4C3     | CYP26B1    | DOCK10            | GRIA2   | NTNG2   | SIM2    |
| OR4C6     | CYP27B1    | DOCK3             | GRID1   | NTRK1   | SIX1    |
| OR4F16    | CYP2A13    | DOCK8             | GRIK1   | NTRK2   | SIX2    |
| OR4F29    | CYP2S1     | DPF3              | GRIK3   | O3FAR1  | SIX3    |
| OR4F3     | CYP4F2     | DPP10             | GRIN1   | OAF     | SKAP1   |
| OR4F5     | CYP4X1     | DPP6              | GRIN2D  | OCA2    | SLC17A6 |
| OR4L1     | CYS1       | DPP9              | GRIN3A  | OLFML2B | SLC17A7 |
| OR4N3P    | DACH1      | DPRX              | GRK5    | OLIG2   | SLC1A2  |
| OR51E1    | DACH2      | DPY19L2P1         | GRM6    | ONECUT1 | SLC24A4 |
| OR52E6    | DACT1      | DPYSL2            | GRM7    | ONECUT2 | SLC26A5 |
| OR52W1    | DBX1       | DRD1              | GSC     | OPRD1   | SLC30A2 |
| OR56B1    | DBX2       | DRD2              | GSC2    | OSR1    | SLC30A3 |
| OR5B17    | DCC        | DRD5              | GSN     | OTOP1   | SLC32A1 |
| OR5H14    | DCX        | DRGX              | GSX1    | OTOP2   | SLC35D3 |
| OR6P1     | DDC        | DSC3              | GSX2    | OTOP3   | SLC35F3 |
| OR6X1     | DDX17      | DSCAM-IT1         | GUCY1A3 | OTP     | SLC6A1  |



|           |                   |         |        |           |          |
|-----------|-------------------|---------|--------|-----------|----------|
| OR8D1     | DDX51             | DSCAML1 | GUCY2D | OTX1      | SLC6A11  |
| OR8G1     | DEFB119           | DSP     | HAND1  | OTX2      | SLC6A3   |
| OR8G2     | DEGS2             | DTL     | HAND2  | OXCT2     | SLC6A5   |
| OR8G5     | DENND6A           | DUOX1   | HBA1   | PABPC1L2A | SLC9A2   |
| OR9Q2     | DGKG              | DUOXA1  | HBA2   | PAPPA     | SLC9A3   |
| OTOA      | DGKK              | DUSP1   | HCG9   | PARM1     | SLCO5A1  |
| OTX2-AS1  | DHDDS             | DUSP5P1 | HCN4   | PAX1      | SLFN11   |
| OVOL2     | DHDH              | DUX2    | HES2   | PAX2      | SLIT3    |
| PABPC4L   | DIO3              | DUX4    | HES3   | PAX3      | SLITRK3  |
| PADI6     | DKFZP434I071<br>4 | DUX4L2  | HES5   | PAX6      | SMOC2    |
| PAK7      | DKFZp686K168<br>4 | DUX4L3  | HES7   | PAX7      | SNTB1    |
| PALLD     | DKK1              | DUX4L5  | HEY1   | PAX8      | SORCS1   |
| PAMR1     | DKK2              | DUX4L6  | HEYL   | PAX9      | SORCS3   |
| PAPL      | DLK1              | DUX4L7  | HHAT   | PCDH17    | SOX14    |
| PAPPA-AS1 | DLL1              | EBF1    | HHEX   | PCDH8     | SOX17    |
| PATL2     | DLL4              | EBF2    | HHIP   | PDE4DIP   | SOX7     |
| PAX3      | DLX1              | EBF3    | HIC1   | PDGFRA    | SPAG6    |
| PAX5      | DLX2              | ECEL1   | HLA-A  | PDX1      | SPON1    |
| PAX6      | DLX3              | ECEL1P2 | HLA-B  | PDZD2     | SPON2    |
| PAX7      | DLX4              | EDA     | HLA-C  | PENK      | SRD5A2   |
| PAXBP1    | DLX5              | EDN3    | HLA-F  | PGM5      | SSTR2    |
| PDCL      | DLX6              | EEF1A1  | HLX    | PGR       | ST8SIA5  |
| PDCL2     | DLX6-AS1          | EEF2    | HMX2   | PHOX2A    | STC2     |
| PDE1B     | DMBT1             | EFCAB6  | HMX3   | PHOX2B    | STMN2    |
| PDE4A     | DMKN              | EFCC1   | HNF1B  | PIGZ      | SUSD4    |
| PDE4DIP   | DMRT1             | EFNA5   | HOXA1  | PIP5K1B   | SV2B     |
| PDIA4     | DMRT2             | EGFL6   | HOXA10 | PIR       | SYNE1    |
| PDPR      | DMRT3             | EGFLAM  | HOXA13 | PITX1     | SYT6     |
| PEG3-AS1  | DMRTA2            | EGR4    | HOXA2  | PITX2     | T        |
| PER4      | DNAH11            | EHD1    | HOXA3  | PITX3     | TACR1    |
| PF4V1     | DNAJB11           | EIF3E   | HOXA4  | PKNOX2    | TBR1     |
| PGLYRP4   | DNTT              | EIF3M   | HOXA6  | PKP1      | TBX1     |
| PGM5-AS1  | DOC2B             | EIF4E3  | HOXA7  | PLEC      | TBX2     |
| PGPEP1L   | DOCK10            | ELAVL2  | HOXA9  | PLXNA2    | TBX20    |
| PGRMC2    | DOCK3             | ELMOD1  | HOXB1  | PMP22     | TBX3     |
| PHACTR3   | DOCK8             | ELOVL3  | HOXB13 | PODN      | TGFA     |
| PHLDA1    | DPF3              | ELOVL7  | HOXB2  | POLE      | THBD     |
| PHOX2B    | DPP10             | ELP3    | HOXB3  | POU3F1    | TLL1     |
| PI16      | DPP6              | EMC1    | HOXB6  | POU3F4    | TLX1     |
| PIK3IP1   | DPP9              | EMILIN2 | HOXB7  | POU4F1    | TLX2     |
| PITX1     | DPRX              | EMX1    | HOXB8  | POU4F2    | TLX3     |
| PITX2     | DPY19L2P1         | EMX2    | HOXC11 | POU4F3    | TMEM132E |
| PKD2L1    | DPYSL2            | EMX2OS  | HOXC12 | PPM1E     | TMEM163  |
| PLA2G7    | DRD1              | EN1     | HOXC4  | PRAC      | TMEM30B  |

|              |           |             |          |         |         |
|--------------|-----------|-------------|----------|---------|---------|
| PLXNC1       | DRD2      | EN2         | HOXC5    | PRDM12  | TMEM59L |
| PNLIP        | DRD5      | ENTHD1      | HOXC6    | PRKCE   | TMOD2   |
| PNPLA8       | DRGX      | ENTPD6      | HOXC8    | PRKG1   | TNFSF9  |
| PPEF2        | DSC3      | EPAS1       | HOXD1    | PRLHR   | TP73    |
| PPIP5K1      | DSCAM-IT1 | EPB41L3     | HOXD12   | PROK2   | TRADD   |
| PPP1R26-AS1  | DSCAML1   | EPB42       | HOXD13   | PTF1A   | TRH     |
| PPP2R2C      | DSP       | EPHA10      | HOXD3    | PTGDR   | TRIM36  |
| PRAC2        | DTL       | EPHA2       | HOXD4    | PTGER2  | TRIM67  |
| PRAMEF10     | DUOX1     | EPHA3       | HOXD8    | PTGER3  | TRPC5   |
| PRAMEF2      | DUOX2     | EPHA5       | HOXD9    | PTGER4  | TSLP    |
| PRDM14       | DUOXA1    | EPHA8       | HPCAL4   | PTGFR   | TWIST1  |
| PRG3         | DUOXA2    | EPO         | HPSE     | PTH2    | UCN     |
| PRICKLE2-AS2 | DUSP1     | EPPIN       | HPSE2    | PTHLH   | UCP1    |
| PRKCZ        | DUSP5P1   | EPPIN-WFDC6 | HR       | PTPRT   | ULBP1   |
| PRR9         | DUX2      | ERAP1       | HRK      | PTPRU   | ULBP2   |
| PRSS16       | DUX4      | ERG         | HS3ST2   | PXMP2   | UNC5C   |
| PRSS22       | DUX4L2    | ERVMER34-1  | HS3ST3B1 | PYY     | USH1G   |
| PRSS3        | DUX4L3    | ESPN        | HS3ST4   | RAB6C   | VAX1    |
| PRSS30P      | DUX4L5    | ESPNL       | HS6ST1P1 | RASGRF1 | VAX2    |
| PTPRD        | DUX4L6    | ESR1        | HS6ST3   | RASL10A | VDR     |
| PVALB        | DUX4L7    | ESRP1       | HSF4     | RASSF5  | WNT1    |
| RAB7L1       | DYSF      | ESX1        | HSPA1A   | RAX     | WNT10A  |
| RAPGEF5      | EBF1      | ESYT3       | HSPA1B   | RBP4    | WNT11   |
| RBP2         | EBF2      | ETS1        | HSPA1L   | REPS2   | WNT2    |
| REXO1L1      | EBF3      | EVX2        | HSPA6    | RGS10   | WNT3A   |
| REXO1L2P     | ECEL1     | EXOSC9      | HTR1A    | RGS20   | WNT6    |
| RGS3         | ECEL1P2   | EYA2        | HTR2C    | RGS9BP  | WNT7A   |
| RNASE7       | EDA       | F11R        | HTR6     | RIMBP3  | WRAP73  |
| RNF128       | EDIL3     | F13A1       | HTR7     | RIMBP3B | ZACN    |
| RNPS1        | EDN3      | FADS6       | HTRA3    | RIMBP3C | ZCCHC16 |
| ROBO1        | EEF1A1    | FAM118B     | ICAM4    | RIMKLA  | ZFHX3   |
| ROBO3        | EEF2      | FAM135B     | ICAM5    | RIPK3   | ZFYVE28 |
| ROMO1        | EFCAB6    | FAM150B     | IGF2-AS  | RNF128  | ZIC1    |
| RPL24        | EFCC1     | FAM155B     | IGFBP1   | ROBO3   | ZIC4    |
| RPSAP52      | EFNA5     | FAM161A     | IGFBP3   | RPRML   | ZMYND15 |
| RRAD         | EGFL6     | FAM163A     | IGSF21   | RPS6KA6 | ZNF436  |
| RSPO1        | EGFLAM    | FAM189A2    | IHH      | RSPO1   | ZNF503  |
| RSPO4        | EGR4      | FAM196A     | IKZF3    | RSPO2   |         |
| S100A6       | EHD1      | FAM19A4     | IL10RA   | RTN4RL2 |         |
| SAMD7        | EIF3E     | FAM201A     | IL11     | RYR3    |         |
| SATB2        | EIF3M     | FAM210A     | IL17D    | SCD5    |         |
| SCARNA6      | EIF4E3    | FAM212A     | IL17RB   | SCN4B   |         |
| SELL         | ELAVL2    | FAM21A      | IL1RAPL2 | SCNN1G  |         |
| SEMA3A       | ELMOD1    | FAM21C      | IL7      | SCTR    |         |
| SERPINB13    | ELOVL3    | FAM32A      | ILDR2    | SEMA6D  |         |

|            |             |           |         |         |
|------------|-------------|-----------|---------|---------|
| SERTAD1    | ELOVL7      | FAM43B    | IMPDH1  | SERTM1  |
| SIM1       | ELP3        | FAM69C    | INA     | SFRP1   |
| SIRPB1     | EMC1        | FAM78B    | INSM2   | SFRP5   |
| SIX6       | EMILIN2     | FAM83F    | INSRR   | SGPP2   |
| SKOR2      | EMX1        | FAM83H    | INTS4L1 | SHC4    |
| SLC13A4    | EMX2        | FAM89A    | IRF4    | SHH     |
| SLC14A2    | EMX2OS      | FAM95C    | IRX1    | SHISA6  |
| SLC18A2    | EN1         | FASTK     | IRX3    | SHOX    |
| SLC22A9    | EN2         | FBLN7     | IRX4    | SHOX2   |
| SLC26A4    | ENTHD1      | FBXL16    | IRX5    | SIDT1   |
| SLC27A6    | ENTPD6      | FBXL20    | ISL1    | SIM2    |
| SLC28A3    | EOMES       | FBXL8     | ISL2    | SIX1    |
| SLC4A11    | EPAS1       | FBXW2     | ITGA4   | SIX2    |
| SLC5A7     | EPB41L3     | FBXW7     | ITIH5   | SIX3    |
| SLC6A12    | EPB42       | FCER1G    | ITPKA   | SIX6    |
| SLC6A2     | EPHA10      | FCER2     | JUN     | SLC10A4 |
| SLC6A20    | EPHA2       | FCHSD2    | KAZALD1 | SLC1A2  |
| SLC6A7     | EPHA3       | FCRL6     | KCNA1   | SLC1A4  |
| SLPI       | EPHA5       | FCRLB     | KCNA3   | SLC24A4 |
| SMC5       | EPHA8       | FENDRR    | KCNA5   | SLC26A4 |
| SMC5-AS1   | EPO         | FERD3L    | KCNAB1  | SLC27A2 |
| SMUG1      | EPPIN       | FEZF1     | KCNC2   | SLC30A2 |
| SNAR-A1    | EPPIN-WFDC6 | FEZF1-AS1 | KCNC4   | SLC30A3 |
| SNAR-A10   | ERAP1       | FEZF2     | KCND3   | SLC30A4 |
| SNAR-A11   | ERG         | FFAR4     | KCNF1   | SLC32A1 |
| SNAR-A12   | ERICH1-AS1  | FGD2      | KCNH1   | SLC35F3 |
| SNAR-A13   | ERVMER34-1  | FGF1      | KCNH3   | SLC6A1  |
| SNAR-A14   | ESPN        | FGF10     | KCNH7   | SLC6A3  |
| SNAR-A2    | ESPNL       | FGF14     | KCNIP2  | SLC6A5  |
| SNAR-A3    | ESR1        | FGF17     | KCNIP4  | SLC9A2  |
| SNAR-A4    | ESRP1       | FGF19     | KCNJ10  | SLC9A3  |
| SNAR-A5    | ESRRG       | FGF23     | KCNJ3   | SLCO2A1 |
| SNAR-A6    | ESX1        | FGF3      | KCNJ4   | SLCO5A1 |
| SNAR-A7    | ESYT3       | FGF5      | KCNJ9   | SLFN11  |
| SNAR-A8    | ETS1        | FGF7      | KCNK12  | SLIT1   |
| SNAR-A9    | EVA1A       | FGF8      | KCNK13  | SLIT2   |
| SNAR-C1    | EVX1        | FGF9      | KCNK17  | SLITRK1 |
| SNAR-C2    | EVX2        | FGFR2     | KCNK2   | SLITRK3 |
| SNAR-C4    | EXOC3L2     | FGL2      | KCNK3   | SORCS1  |
| SNAR-C5    | EXOSC9      | FIBCD1    | KCNK4   | SORCS3  |
| SNHG7      | EYA2        | FIGLA     | KCNMA1  | SOX14   |
| SNORA45    | F11R        | FLI1      | KCNQ1   | SOX17   |
| SNORD113-6 | F13A1       | FLJ12825  | KCNQ3   | SOX7    |
| SNRPA1     | FADS6       | FLJ20518  | KCNQ5   | SPAG6   |
| SNX16      | FAHD1       | FLJ31813  | KCNS2   | SPOCK3  |

|          |           |           |              |          |
|----------|-----------|-----------|--------------|----------|
| SNX29P1  | FAIM      | FLJ44511  | KCNS3        | SPON1    |
| SOX18    | FAM118B   | FLRT2     | KCNV1        | SRD5A2   |
| SOX5     | FAM135B   | FLT1      | KIAA1191     | SSTR1    |
| SOX8     | FAM150A   | FLT3      | KIAA1199     | SSTR2    |
| SP6      | FAM150B   | FLT4      | KIAA1324     | ST8SIA2  |
| SP8      | FAM155B   | FNDC1     | KIRREL3      | STK32B   |
| SPDEF    | FAM159B   | FNIP1     | KIRREL3-AS3  | STMN2    |
| SPDYE3   | FAM161A   | FOXA1     | KISS1R       | STXBP6   |
| SPERT    | FAM163A   | FOXA3     | KL           | SUSD4    |
| SPINK8   | FAM189A2  | FOXB1     | KLF4         | SV2B     |
| SPOCK3   | FAM196A   | FOXB2     | KLHL1        | SYT12    |
| SRP9     | FAM19A4   | FOXC1     | KLHL13       | TAL1     |
| SRSF7    | FAM201A   | FOXC2     | KLHL14       | TBR1     |
| SSTR1    | FAM210A   | FOXD1     | KLHL17       | TBX1     |
| SSTR5    | FAM212A   | FOXD2-AS1 | KLHL35       | TBX2     |
| ST14     | FAM21A    | FOXD3     | KLK4         | TBX21    |
| ST5      | FAM21C    | FOXD4     | KY           | TBX3     |
| STX6     | FAM32A    | FOXD4L2   | LAMB1        | TBX5     |
| SYCP1    | FAM43B    | FOXD4L3   | LAYN         | TCEA3    |
| TAAR1    | FAM69C    | FOXD4L4   | LBX1         | TET2     |
| TAC1     | FAM78B    | FOXD4L5   | LEF1         | TFAP2E   |
| TAGAP    | FAM83F    | FOXD4L6   | LEKR1        | THBD     |
| TAL1     | FAM83H    | FOXE1     | LGALS3       | TLL1     |
| TARBP1   | FAM89A    | FOXE3     | LGI3         | TLX1     |
| TAS2R39  | FAM95C    | FOXF1     | LGR5         | TLX2     |
| TBC1D3   | FASTK     | FOXF2     | LHFPL3       | TMEFF2   |
| TBC1D3C  | FBLN7     | FOXG1     | LHX2         | TMEM132E |
| TBC1D3F  | FBXL16    | FOXI2     | LHX3         | TMEM27   |
| TBC1D3H  | FBXL20    | FOXI3     | LHX4         | TMEM30B  |
| TBC1D3P5 | FBXL21    | FOXL1     | LHX5         | TMEM59L  |
| TBX15    | FBXL8     | FOXL2     | LHX6         | TMEM88   |
| TBX4     | FBXW2     | FOXO3     | LHX8         | TMOD2    |
| TBX5     | FBXW7     | FOXP2     | LINC00268    | TP73     |
| TBX5-AS1 | FCER1G    | FOXQ1     | LMO1         | TPPP3    |
| TCF21    | FCER2     | FREM3     | LMOD1        | TRADD    |
| TES      | FCGR1C    | FRG2B     | LMX1B        | TRH      |
| TFAP2A   | FCHSD2    | FRG2C     | LOC100131554 | TRIM36   |
| TFAP2B   | FCRL6     | FRMD3     | LOC153684    | TRIM67   |
| TFAP2D   | FCRLB     | FRMD4B    | LOC154761    | TRIM9    |
| TGM5     | FENDRR    | FRMPD1    | LOC84931     | TRPC5    |
| TGM6     | FERD3L    | FSHR      | LONRF3       | TSLP     |
| TIGD2    | FEV       | FSIP2     | LPHN3        | TTYH1    |
| TMEM132B | FEZF1     | FST       | LPL          | UCN      |
| TMEM174  | FEZF1-AS1 | FSTL4     | LPPR1        | UCP1     |
| TMEM45B  | FEZF2     | FTCDNL1   | LRAT         | UNC5C    |

|            |           |           |          |         |
|------------|-----------|-----------|----------|---------|
| TNFAIP2    | FFAR4     | FUOM      | LRBA     | USH1G   |
| TNFSF11    | FGD2      | FUS       | LRCH2    | VASH1   |
| TNS4       | FGF1      | FXYD2     | LRFN2    | VAX1    |
| TOB1       | FGF10     | FXYD5     | LRFN5    | VAX2    |
| TPI1P3     | FGF14     | FXYD7     | LRP2     | VDR     |
| TPM3       | FGF17     | FZD10     | LRRC71   | VSX1    |
| TREML4     | FGF19     | FZD10-AS1 | LRRTM1   | VSX2    |
| TRPA1      | FGF23     | GAB3      | LTBP2    | WNT1    |
| UBC        | FGF3      | GABPA     | LTK      | WNT10A  |
| UCA1       | FGF4      | GABRA2    | LY6H     | WNT10B  |
| UPK1A-AS1  | FGF5      | GABRA4    | LYSMD2   | WNT11   |
| UPK3A      | FGF7      | GABRB2    | MAB21L1  | WNT16   |
| USHBP1     | FGF8      | GABRE     | MAB21L2  | WNT2    |
| USP16      | FGF9      | GAD2      | MADCAM1  | WNT3A   |
| USP44      | FGFR2     | GADD45G   | MAFB     | WNT6    |
| USP46      | FGL2      | GAGE12F   | MAL      | WNT7A   |
| USPL1      | FIBCD1    | GAGE12I   | MAN1C1   | WRAP73  |
| VGLL2      | FIGLA     | GAGE2A    | MAP6     | WT1     |
| VSIG10L    | FLI1      | GAGE2B    | MAPK4    | WT1-AS  |
| VSX1       | FLI1-AS1  | GAGE2C    | MAPK8IP2 | ZADH2   |
| VSX2       | FLJ12825  | GAGE2E    | MAPT     | ZBTB16  |
| VTCN1      | FLJ20518  | GAGE4     | MAST4    | ZCCHC16 |
| WDR72      | FLJ31813  | GAGE5     | MCOLN3   | ZEB2    |
| WIPF3      | FLJ36000  | GAGE7     | MECOM    | ZFHX3   |
| WNT10B     | FLJ44511  | GAGE8     | MED31    | ZFYVE28 |
| WNT16      | FLRT2     | GAL       | MEIS1    | ZIC1    |
| WNT8B      | FLT1      | GALNT3    | MEOX2    | ZIC4    |
| WT1        | FLT3      | GALNT6    | MESPI    | ZMYND15 |
| WT1-AS     | FLT4      | GALNT9    | METRNL   | ZNF436  |
| XDH        | FNDC1     | GALR1     | MFSD4    | ZNF503  |
| ZAN        | FNIP1     | GALR2     | MGC39545 |         |
| ZMYM3      | FOXA1     | GAN       | MICB     |         |
| ZMYM4      | FOXA2     | GAP43     | MIR137HG |         |
| ZNF260     | FOXA3     | GAS2      | MKX      |         |
| ZNF280A    | FOXB1     | GATA3     | MLLT3    |         |
| ZNF420     | FOXB2     | GATA3-AS1 | MLPH     |         |
| ZNF462     | FOXC1     | GATA4     | MLXIPL   |         |
| ZNF503-AS1 | FOXC2     | GATA5     | MMD2     |         |
| ZNF534     | FOXD1     | GATA6     | MMP2     |         |
| ZNF555     | FOXD2     | GATA6-AS1 | MNX1     |         |
| ZNF676     | FOXD2-AS1 | GBX1      | MSC      |         |
| ZPBP2      | FOXD3     | GBX2      | MSX1     |         |
|            | FOXD4     | GCGR      | MSX2     |         |
|            | FOXD4L1   | GCM2      | MT1A     |         |
|            | FOXD4L2   | GDE1      | MT1B     |         |

|           |         |          |
|-----------|---------|----------|
| FOXD4L3   | GDF6    | MT1DP    |
| FOXD4L4   | GDF7    | MT1H     |
| FOXD4L5   | GET4    | MT1M     |
| FOXD4L6   | GFI1B   | MT3      |
| FOXE1     | GFRA1   | MXRA7    |
| FOXE3     | GFRA4   | MYB      |
| FOXF1     | GGT8P   | MYF6     |
| FOXF2     | GHR     | MYO5B    |
| FOXG1     | GHRL    | MYOD1    |
| FOXI2     | GHSR    | NAGS     |
| FOXI3     | GIMAP4  | NAV2     |
| FOXL1     | GINS3   | NBL1     |
| FOXL2     | GIPC1   | NBPF11   |
| FOXO3     | GJA3    | NCAM1    |
| FOXP2     | GJB2    | NCCRP1   |
| FOXQ1     | GJB3    | NDRG1    |
| FREM3     | GJB4    | NDUFA4L2 |
| FRG2B     | GJB6    | NEFH     |
| FRG2C     | GJD2    | NEFL     |
| FRMD3     | GLB1L   | NEFM     |
| FRMD4B    | GLB1L3  | NEGR1    |
| FRMPD1    | GLP1R   | NELL1    |
| FSHR      | GLYAT   | NEURL    |
| FSIP2     | GMFB    | NEUROD1  |
| FST       | GNAL    | NEUROD2  |
| FSTL4     | GNAS    | NEUROG1  |
| FTCDNL1   | GNE     | NEUROG2  |
| FUOM      | GNG13   | NEUROG3  |
| FUS       | GNN     | NFIA     |
| FXYD2     | GOLGA3  | NFIC     |
| FXYD5     | GOLGA7B | NFIX     |
| FXYD7     | GPAM    | NGF      |
| FZD10     | GPR101  | NGFR     |
| FZD10-AS1 | GPR139  | NIM1     |
| GAB3      | GPR149  | NIN      |
| GABPA     | GPR158  | NKAIN2   |
| GABRA1    | GPR26   | NKPD1    |
| GABRA2    | GPR27   | NKX2-1   |
| GABRA4    | GPR50   | NKX2-2   |
| GABRB2    | GPR64   | NKX2-3   |
| GABRE     | GPR78   | NKX2-5   |
| GAD2      | GPR88   | NKX2-8   |
| GADD45G   | GRAP2   | NKX3-1   |
| GAGE12F   | GRB7    | NKX3-2   |
| GAGE12I   | GREM1   | NKX6-1   |

|           |           |         |
|-----------|-----------|---------|
| GAGE2A    | GRIA2     | NKX6-2  |
| GAGE2B    | GRID1     | NOC2L   |
| GAGE2C    | GRIK3     | NOL4    |
| GAGE2E    | GRIN1     | NOTUM   |
| GAGE4     | GRIN2C    | NOVA2   |
| GAGE5     | GRIN3B    | NOXO1   |
| GAGE7     | GRM1      | NPAS1   |
| GAGE8     | GRM6      | NPAS2   |
| GAL       | GRM7      | NPAS4   |
| GALNT3    | GRM8      | NPNT    |
| GALNT6    | GRP       | NPR1    |
| GALNT9    | GSC       | NPR3    |
| GALR1     | GSC2      | NPTX1   |
| GALR2     | GSDMC     | NPY1R   |
| GAN       | GSG1L     | NPY5R   |
| GAP43     | GSG2      | NR2E1   |
| GAS2      | GSTA3     | NR2F2   |
| GATA2     | GSTZ1     | NR4A3   |
| GATA3     | GSX1      | NRG1    |
| GATA3-AS1 | H1F0      | NRG2    |
| GATA4     | H1FX      | NRGN    |
| GATA5     | H1FX-AS1  | NRIP3   |
| GATA6     | H3F3B     | NRN1    |
| GATA6-AS1 | HAND1     | NRXN1   |
| GBA       | HAND2     | NT5C1A  |
| GBX1      | HAND2-AS1 | NTN1    |
| GBX2      | HAP1      | NTNG2   |
| GCGR      | HAPLN4    | NTRK1   |
| GCM2      | HAUS2     | NTRK2   |
| GDE1      | HBM       | NXPH4   |
| GDF6      | HBZ       | O3FAR1  |
| GDF7      | HCFC2     | OAF     |
| GNDF      | HCN4      | OCA2    |
| GNDF-AS1  | HCRTR2    | OLFML2B |
| GET4      | HCST      | OLIG2   |
| GFI1      | HDAC9     | OLIG3   |
| GFI1B     | HDHD2     | ONECUT1 |
| GFOD1     | HDLBP     | ONECUT2 |
| GFRA1     | HECW1     | OPRD1   |
| GFRA4     | HELT      | OSBP2   |
| GGT8P     | HERC4     | OSR1    |
| GHR       | HERC5     | OSR2    |
| GHRL      | HES2      | OTOP1   |
| GHSR      | HES3      | OTOP2   |
| GIMAP4    | HEY2      | OTOP3   |

|         |           |           |
|---------|-----------|-----------|
| GINS3   | HHEX      | OTP       |
| GIPC1   | HHIP-AS1  | OTX1      |
| GIPC2   | HHLA1     | OTX2      |
| GJA3    | HIST1H1C  | OVOL1     |
| GJB2    | HIST1H1E  | OXCT2     |
| GJB3    | HIST1H2AC | P2RX5     |
| GJB4    | HIST1H2AE | PABPC1L2A |
| GJB6    | HIST1H2BC | PADI2     |
| GJD2    | HIST1H2BG | PAPL      |
| GLB1L   | HIST1H3J  | PAPPA     |
| GLB1L3  | HLA-J     | PARD3B    |
| GLIS1   | HLF       | PARM1     |
| GLP1R   | HLX       | PARP8     |
| GLYAT   | HMBS      | PAX1      |
| GMFB    | HMGA2     | PAX2      |
| GNAL    | HMGCS1    | PAX3      |
| GNAS    | HMGCS2    | PAX5      |
| GNE     | HMHA1     | PAX6      |
| GNG13   | HMX1      | PAX7      |
| GNN     | HMX2      | PAX8      |
| GOLGA3  | HMX3      | PAX9      |
| GOLGA7B | HNRNPA1L2 | PCDH17    |
| GPAM    | HOPX      | PCDH8     |
| GPR101  | HOTAIRM1  | PCDHGC4   |
| GPR139  | HOXA1     | PCGF5     |
| GPR149  | HOXA11-AS | PCSK2     |
| GPR158  | HOXA2     | PDE10A    |
| GPR26   | HOXA4     | PDE1B     |
| GPR27   | HOXA5     | PDE4DIP   |
| GPR4    | HOXA6     | PDE8A     |
| GPR50   | HOXB3     | PDE8B     |
| GPR64   | HOXB7     | PDGFRA    |
| GPR78   | HOXB8     | PDX1      |
| GPR88   | HOXB9     | PDZD2     |
| GRAP2   | HOXC10    | PENK      |
| GRB7    | HOXC6     | PGM5      |
| GREM1   | HOXC9     | PGR       |
| GRIA2   | HOXC-AS1  | PHLDB1    |
| GRID1   | HOXD11    | PHOX2A    |
| GRIK3   | HOXD13    | PHOX2B    |
| GRIN1   | HOXD8     | PHYHIPL   |
| GRIN2C  | HOXD9     | PIGZ      |
| GRIN3A  | HOXD-AS1  | PIP5K1B   |
| GRIN3B  | HOXD-AS2  | PIR       |
| GRM1    | HPCA      | PITX1     |



|           |          |          |
|-----------|----------|----------|
| GRM4      | HPGD     | PITX2    |
| GRM6      | HPN-AS1  | PITX3    |
| GRM7      | HPSE     | PKNOX2   |
| GRM8      | HPSE2    | PKP1     |
| GRP       | HR       | PLEC     |
| GSC       | HRC      | PLLP     |
| GSC2      | HRH1     | PLP1     |
| GSDMC     | HRH2     | PLXNA2   |
| GSG1L     | HRH3     | PLXNC1   |
| GSG2      | HRK      | PMP22    |
| GSTA3     | HS3ST2   | PODN     |
| GSTZ1     | HS3ST3A1 | POLE     |
| GSX1      | HS3ST3B1 | POLR3GL  |
| GSX2      | HS3ST4   | POMC     |
| H1F0      | HS3ST6   | POU3F1   |
| H1FX      | HS6ST3   | POU3F2   |
| H1FX-AS1  | HSF4     | POU3F4   |
| H2AFX     | HSP90AA1 | POU4F1   |
| H3F3B     | HSP90B1  | POU4F2   |
| HAGH      | HSPB1    | POU4F3   |
| HAND1     | HSPH1    | PPM1E    |
| HAND2     | HTR1A    | PPP1R13B |
| HAND2-AS1 | HTR1B    | PPP1R14C |
| HAP1      | HTR4     | PRAC     |
| HAPLN4    | HTR6     | PRDM12   |
| HAUS2     | ICAM1    | PRDM13   |
| HBA1      | ICAM5    | PRKAG2   |
| HBA2      | ICOSLG   | PRKCB    |
| HBM       | ID3      | PRKCE    |
| HBZ       | ID4      | PRKCH    |
| HCFC2     | IDO2     | PRKD1    |
| HCK       | IFIH1    | PRKG1    |
| HCN4      | IFITM10  | PRLHR    |
| HCRTR2    | IFNG     | PROK2    |
| HCST      | IFNL4    | PRR18    |
| HDAC9     | IFT27    | PRRT1    |
| HDHD2     | IGF2-AS  | PRSS12   |
| HDLBP     | IGFBP3   | PRUNE2   |
| HECW1     | IGFL1    | PSD2     |
| HELT      | IHH      | PTF1A    |
| HEMGN     | IKZF1    | PTGDR    |
| HERC4     | IKZF3    | PTGER2   |
| HERC5     | IL10RA   | PTGER3   |
| HES2      | IL15RA   | PTGER4   |
| HES3      | IL17REL  | PTGFR    |

|                  |           |           |
|------------------|-----------|-----------|
| HEY2             | IL1F10    | PTH2      |
| HHEX             | IL1RAPL2  | PTHLH     |
| HHIP-AS1         | IL20RA    | PTPRN2    |
| HHLA1            | IL22RA2   | PTPRT     |
| HIST1H1A         | IL6R      | PTPRU     |
| HIST1H1C         | IL7       | PXMP2     |
| HIST1H1D         | IL9R      | PYY       |
| HIST1H1E         | ILF2      | RAB11FIP3 |
| HIST1H2AC        | IMP3      | RAB33A    |
| HIST1H2AE        | IMPACT    | RAB40B    |
| HIST1H2BC        | INCA1     | RAB6C     |
| HIST1H2BG        | INSL5     | RAB9B     |
| HIST1H3J         | INSM1     | RAMP1     |
| HIST2H2AA3       | INSRR     | RAPGEF4   |
| HIST2H2AA4       | INTS4L2   | RARA      |
| HIST2H2BC        | INTS6     | RARRES2   |
| HLA-J            | INTS6-AS1 | RASGEF1C  |
| HLF              | INTS7     | RASGRF1   |
| HLX              | IQGAP2    | RASL10A   |
| HMBS             | IQSEC2    | RASSF5    |
| HMGA2            | IQSEC3    | RAX       |
| HMGCS1           | IRF5      | RBBP7     |
| HMGCS2           | IRF8      | RBP4      |
| HMHA1            | IRX1      | RBP7      |
| HMX1             | IRX2      | RCSD1     |
| HMX2             | IRX3      | REEP1     |
| HMX3             | IRX5      | REPS2     |
| HNF1B            | IRX6      | RFX4      |
| HNRNPA1L2        | ISL1      | RFX6      |
| HOPX             | ISLR2     | RGAG4     |
| HOTAIR           | ISM1      | RGS10     |
| HOTAIRM1         | ITGA11    | RGS20     |
| HOTTIP           | ITGA4     | RGS9      |
| HOXA1            | ITGA8     | RGS9BP    |
| HOXA10           | ITGB2-AS1 | RIMBP3    |
| HOXA10-<br>HOXA9 | ITIH5     | RIMBP3B   |
| HOXA11           | ITPKA     | RIMBP3C   |
| HOXA11-AS        | ITPR3     | RIMKLA    |
| HOXA13           | ITPRIPL1  | RIMS4     |
| HOXA2            | IVNS1ABP  | RIPK3     |
| HOXA3            | JPH3      | RIPPLY2   |
| HOXA4            | JUND      | RNF128    |
| HOXA5            | KANK4     | RNF2      |
| HOXA6            | KBTBD12   | RNPEPL1   |
| HOXA7            | KBTBD13   | ROBO3     |

|          |            |         |
|----------|------------|---------|
| HOXA9    | KCNA1      | RPRML   |
| HOXA-AS3 | KCNA10     | RPS6KA2 |
| HOXA-AS4 | KCNA2      | RPS6KA6 |
| HOXB1    | KCNA5      | RSPO1   |
| HOXB13   | KCNA7      | RSPO2   |
| HOXB2    | KCNAB1     | RSPO3   |
| HOXB3    | KCNAB2     | RTBDN   |
| HOXB4    | KCNB2      | RTN4RL2 |
| HOXB5    | KCNC4      | RUNX2   |
| HOXB6    | KCNE2      | RXRG    |
| HOXB7    | KCNH2      | RYR3    |
| HOXB8    | KCNH4      | SAMD11  |
| HOXB9    | KCNH5      | SATB2   |
| HOXB-AS1 | KCNIP2-AS1 | SCD5    |
| HOXB-AS3 | KCNIP3     | SCIN    |
| HOXC10   | KCNIP4     | SCN4B   |
| HOXC11   | KCNJ12     | SCNN1G  |
| HOXC12   | KCNJ5      | SCTR    |
| HOXC13   | KCNK1      | SCUBE3  |
| HOXC4    | KCNK10     | SECTM1  |
| HOXC5    | KCNK12     | SEMA3B  |
| HOXC6    | KCNK13     | SEMA4F  |
| HOXC8    | KCNK15     | SEMA6D  |
| HOXC9    | KCNK17     | SERTM1  |
| HOXC-AS1 | KCNK2      | SEZ6    |
| HOXC-AS2 | KCNK4      | SFRP1   |
| HOXC-AS5 | KCNK6      | SFRP4   |
| HOXD1    | KCNK9      | SFRP5   |
| HOXD10   | KCNMA1     | SFTPC   |
| HOXD11   | KCNMB4     | SGPP2   |
| HOXD12   | KCNN2      | SH3GL2  |
| HOXD13   | KCNQ1      | SHC4    |
| HOXD3    | KCNQ3      | SHH     |
| HOXD4    | KCNS2      | SHISA6  |
| HOXD8    | KCNS3      | SHOX    |
| HOXD9    | KCNV1      | SHOX2   |
| HOXD-AS1 | KDM1A      | SIDT1   |
| HOXD-AS2 | KDM3B      | SIM1    |
| HPCA     | KDM4A      | SIM2    |
| HPGD     | KDM4D      | SIX1    |
| HPN-AS1  | KIAA0087   | SIX2    |
| HPSE     | KIAA0226L  | SIX3    |
| HPSE2    | KIAA1009   | SIX6    |
| HR       | KIAA1024   | SKAP1   |
| HRC      | KIAA1211L  | SLC10A4 |

|          |             |          |
|----------|-------------|----------|
| HRH1     | KIAA1244    | SLC16A11 |
| HRH2     | KIAA1324    | SLC17A6  |
| HRH3     | KIF1C       | SLC17A7  |
| HRK      | KIF5B       | SLC1A2   |
| HS3ST1   | KIRREL3     | SLC1A4   |
| HS3ST2   | KIRREL3-AS3 | SLC22A3  |
| HS3ST3A1 | KISS1R      | SLC24A4  |
| HS3ST3B1 | KIT         | SLC25A27 |
| HS3ST4   | KL          | SLC26A4  |
| HS3ST6   | KLF1        | SLC26A5  |
| HS6ST3   | KLF4        | SLC27A2  |
| HSF4     | KLF6        | SLC30A10 |
| HSP90AA1 | KLHDC9      | SLC30A2  |
| HSP90B1  | KLHL24      | SLC30A3  |
| HSPA5    | KLHL30      | SLC30A4  |
| HSPA6    | KLHL32      | SLC32A1  |
| HSPB1    | KLHL35      | SLC35D3  |
| HSPH1    | KLK1        | SLC35F3  |
| HTR1A    | KLK10       | SLC35G1  |
| HTR1B    | KLK13       | SLC40A1  |
| HTR2C    | KLK4        | SLC6A1   |
| HTR4     | KLK9        | SLC6A11  |
| HTR6     | KLRG2       | SLC6A2   |
| ICAM1    | KMT2A       | SLC6A20  |
| ICAM4    | KNTC1       | SLC6A3   |
| ICAM5    | KPNA4       | SLC6A5   |
| ICOSLG   | KRT1        | SLC9A2   |
| ID3      | KRT19       | SLC9A3   |
| ID4      | KRT19P2     | SLCO2A1  |
| IDO2     | KRT25       | SLCO3A1  |
| IFIH1    | KRT36       | SLCO5A1  |
| IFITM10  | KRT7        | SLFN11   |
| IFNG     | KRT71       | SLIT1    |
| IFNL4    | KRT78       | SLIT2    |
| IFT27    | KRT83       | SLIT3    |
| IGF2     | KRTAP13-1   | SLITRK1  |
| IGF2-AS  | KRTAP5-9    | SLITRK3  |
| IGFBP3   | KRTCAP2     | SMOC2    |
| IGFL1    | L1CAM       | SMPD3    |
| IGSF21   | LACE1       | SNAI2    |
| IHH      | LAD1        | SNCAIP   |
| IKZF1    | LAMB1       | SNTB1    |
| IKZF3    | LAMP5       | SORCS1   |
| IL10RA   | LARP1B      | SORCS3   |
| IL15RA   | LARS        | SOX14    |

|           |           |         |
|-----------|-----------|---------|
| IL17REL   | LASP1     | SOX17   |
| IL1F10    | LBH       | SOX7    |
| IL1RAPL2  | LBX1      | SOX8    |
| IL20RA    | LBX1-AS1  | SOX9    |
| IL22RA2   | LBX2-AS1  | SPAG6   |
| IL6R      | LDB2      | SPOCK3  |
| IL7       | LEF1      | SPON1   |
| IL9R      | LEF1-AS1  | SPON2   |
| ILF2      | LEPR      | SPTB    |
| IMP3      | LFNG      | SPTBN4  |
| IMPACT    | LGALS4    | SRD5A2  |
| INCA1     | LGI1      | SRRM4   |
| INSL5     | LGI3      | SSBP4   |
| INSM1     | LGR5      | SSTR1   |
| INSRR     | LGR6      | SSTR2   |
| INTS4L2   | LHFPL3    | ST8SIA2 |
| INTS6     | LHFPL4    | ST8SIA4 |
| INTS6-AS1 | LHX1      | ST8SIA5 |
| INTS7     | LHX2      | STC2    |
| IQGAP2    | LHX3      | STK32B  |
| IQSEC2    | LHX4      | STMN2   |
| IQSEC3    | LHX5      | STX1A   |
| IRF4      | LHX9      | STXBP6  |
| IRF5      | LIAS      | SUSD4   |
| IRF8      | LIF       | SV2B    |
| IRX1      | LILRA6    | SYNE1   |
| IRX2      | LIMS2     | SYT12   |
| IRX3      | LIN28A    | SYT6    |
| IRX4      | LIN28B    | SYT7    |
| IRX5      | LINC00114 | T       |
| IRX6      | LINC00115 | TAC1    |
| ISL1      | LINC00210 | TACR1   |
| ISL2      | LINC00221 | TACSTD2 |
| ISLR2     | LINC00222 | TAL1    |
| ISM1      | LINC00261 | TAP1    |
| ITGA11    | LINC00273 | TBR1    |
| ITGA4     | LINC00461 | TBX1    |
| ITGA8     | LINC00466 | TBX2    |
| ITGB2     | LINC00473 | TBX20   |
| ITGB2-AS1 | LINC00475 | TBX21   |
| ITIH5     | LINC00485 | TBX3    |
| ITPKA     | LINC00599 | TBX5    |
| ITPR3     | LINC00608 | TBXAS1  |
| ITPRIPL1  | LINC00617 | TCEA3   |
| IVNS1ABP  | LINC00629 | TCEAL1  |

|            |              |          |
|------------|--------------|----------|
| JPH3       | LINC00643    | TCEAL8   |
| JUND       | LINC00682    | TCF21    |
| KANK4      | LINC00693    | TCTE1    |
| KBTBD12    | LINC00707    | TET2     |
| KBTBD13    | LINC00940    | TFAP2B   |
| KCNA1      | LINC00943    | TFAP2D   |
| KCNA10     | LINC00951    | TFAP2E   |
| KCNA2      | LINC00960    | TGFA     |
| KCNA5      | LINC00966    | THBD     |
| KCNA7      | LINC01024    | THBS2    |
| KCNAB1     | LINC01081    | TIGD3    |
| KCNAB2     | LINGO2       | TLE2     |
| KCNB2      | LIPI         | TLL1     |
| KCNC4      | LIPJ         | TLX1     |
| KCNE2      | LMTK3        | TLX2     |
| KCNH2      | LMX1A        | TLX3     |
| KCNH4      | LMX1B        | TMEFF2   |
| KCNH5      | LNX1         | TMEM106C |
| KCNIP2-AS1 | LOC100128770 | TMEM132E |
| KCNIP3     | LOC100129148 | TMEM151A |
| KCNIP4     | LOC100129175 | TMEM163  |
| KCNJ12     | LOC100129917 | TMEM185A |
| KCNJ5      | LOC100130476 | TMEM27   |
| KCNK1      | LOC100130539 | TMEM30B  |
| KCNK10     | LOC100130992 | TMEM54   |
| KCNK12     | LOC100131320 | TMEM59L  |
| KCNK13     | LOC100132111 | TMEM88   |
| KCNK15     | LOC100132215 | TMOD2    |
| KCNK17     | LOC100132891 | TNFRSF1B |
| KCNK2      | LOC100134391 | TNFSF9   |
| KCNK4      | LOC100144602 | TP73     |
| KCNK6      | LOC100190940 | TPPP3    |
| KCNK9      | LOC100240734 | TRADD    |
| KCNMA1     | LOC100240735 | TRH      |
| KCNMB4     | LOC100268168 | TRIM28   |
| KCNN2      | LOC100288069 | TRIM36   |
| KCNQ1      | LOC100288637 | TRIM67   |
| KCNQ3      | LOC100288748 | TRIM7    |
| KCNS2      | LOC100288842 | TRIM9    |
| KCNS3      | LOC100288866 | TRPC5    |
| KCNV1      | LOC100288911 | TSLP     |
| KDM1A      | LOC100505622 | TTLL7    |
| KDM3B      | LOC100505782 | TTLL9    |
| KDM4A      | LOC100506127 | TTPA     |
| KDM4D      | LOC100506551 | TTYH1    |

|             |              |         |
|-------------|--------------|---------|
| KIAA0087    | LOC100506810 | TWIST1  |
| KIAA0226L   | LOC100653046 | UCN     |
| KIAA1009    | LOC100996485 | UCP1    |
| KIAA1024    | LOC101054525 | ULBP1   |
| KIAA1211L   | LOC145474    | ULBP2   |
| KIAA1217    | LOC145845    | UNC5B   |
| KIAA1239    | LOC146513    | UNC5C   |
| KIAA1244    | LOC152578    | USH1G   |
| KIAA1324    | LOC153684    | VASH1   |
| KIF1C       | LOC283299    | VAV3    |
| KIF5B       | LOC283731    | VAX1    |
| KIRREL3     | LOC284395    | VAX2    |
| KIRREL3-AS3 | LOC284412    | VDR     |
| KISS1       | LOC284801    | VGLL2   |
| KISS1R      | LOC285084    | VSX1    |
| KIT         | LOC285547    | VSX2    |
| KL          | LOC285548    | WNT1    |
| KLF1        | LOC340017    | WNT10A  |
| KLF14       | LOC348761    | WNT10B  |
| KLF4        | LOC375295    | WNT11   |
| KLF6        | LOC388242    | WNT16   |
| KLHDC9      | LOC389023    | WNT2    |
| KLHL24      | LOC389895    | WNT3A   |
| KLHL30      | LOC392232    | WNT5B   |
| KLHL32      | LOC399829    | WNT6    |
| KLHL35      | LOC400043    | WNT7A   |
| KLK1        | LOC400456    | WRAP73  |
| KLK10       | LOC401463    | WSCD1   |
| KLK13       | LOC402160    | WT1     |
| KLK4        | LOC440461    | WT1-AS  |
| KLK9        | LOC440896    | XYLT1   |
| KLRG2       | LOC440925    | YAF2    |
| KMT2A       | LOC493754    | ZACN    |
| KNTC1       | LOC613038    | ZADH2   |
| KPNA2       | LOC63930     | ZBTB16  |
| KPNA4       | LOC642366    | ZBTB7A  |
| KRT1        | LOC643201    | ZCCHC16 |
| KRT19       | LOC643837    | ZEB2    |
| KRT19P2     | LOC643923    | ZFHX3   |
| KRT25       | LOC648987    | ZFPM1   |
| KRT36       | LOC654342    | ZFYVE28 |
| KRT7        | LOC728463    | ZIC1    |
| KRT71       | LOC728739    | ZIC4    |
| KRT76       | LOC728989    | ZMYND15 |
| KRT78       | LOC729911    | ZNF436  |

|           |           |        |
|-----------|-----------|--------|
| KRT83     | LONRF3    | ZNF503 |
| KRTAP13-1 | LOR       |        |
| KRTAP5-9  | LPIN1     |        |
| KRTCAP2   | LPL       |        |
| L1CAM     | LPPR4     |        |
| L1TD1     | LRG1      |        |
| LACE1     | LRRC18    |        |
| LAD1      | LRRC38    |        |
| LAMA3     | LRRC57    |        |
| LAMB1     | LRRC71    |        |
| LAMP5     | LRRK1     |        |
| LARP1B    | LSR       |        |
| LARS      | LTA4H     |        |
| LASP1     | LTBP2     |        |
| LBH       | LTK       |        |
| LBX1      | LUZP2     |        |
| LBX1-AS1  | LYSMD1    |        |
| LBX2      | LYSMD2    |        |
| LBX2-AS1  | MAB21L1   |        |
| LDB2      | MAB21L2   |        |
| LEF1      | MAFB      |        |
| LEF1-AS1  | MAGEC2    |        |
| LEPR      | MAGED1    |        |
| LFNG      | MAL       |        |
| LGALS4    | MAL2      |        |
| LGI1      | MANBAL    |        |
| LGI3      | MAP3K13   |        |
| LGR5      | MAPKAPK2  |        |
| LGR6      | MAPKAPK5  |        |
| LHFPL3    | MAPRE2    |        |
| LHFPL4    | MAPT-AS1  |        |
| LHX1      | MAPT-IT1  |        |
| LHX2      | MATK      |        |
| LHX3      | MBIP      |        |
| LHX4      | MBL2      |        |
| LHX5      | MBNL3     |        |
| LHX6      | MBP       |        |
| LHX8      | MC5R      |        |
| LHX9      | MCHR2     |        |
| LIAS      | MCHR2-AS1 |        |
| LIF       | MCIDAS    |        |
| LILRA5    | MCOLN2    |        |
| LILRA6    | MCOLN3    |        |
| LIMS2     | MCRS1     |        |
| LIN28A    | MDGA1     |        |



|              |           |
|--------------|-----------|
| LIN28B       | MECOM     |
| LINC00114    | MECR      |
| LINC00115    | MED1      |
| LINC00210    | MED8      |
| LINC00221    | MEFV      |
| LINC00222    | MEIS1     |
| LINC00261    | MEIS1-AS3 |
| LINC00273    | MEIS2     |
| LINC00461    | MEOX2     |
| LINC00466    | MEPCE     |
| LINC00473    | MESP1     |
| LINC00475    | MET       |
| LINC00485    | METTL12   |
| LINC00489    | METTL25   |
| LINC00554    | MFSD4     |
| LINC00599    | MGC12916  |
| LINC00608    | MGC39584  |
| LINC00617    | MGEA5     |
| LINC00629    | MGME1     |
| LINC00643    | MICAL2    |
| LINC00682    | MICB      |
| LINC00693    | MIR124-1  |
| LINC00707    | MIR124-2  |
| LINC00910    | MIR124-3  |
| LINC00940    | MIR1247   |
| LINC00943    | MIR1253   |
| LINC00951    | MIR128-1  |
| LINC00960    | MIR129-2  |
| LINC00966    | MIR144    |
| LINC01024    | MIR1469   |
| LINC01081    | MIR183    |
| LINGO2       | MIR188    |
| LIP1         | MIR190B   |
| LIPJ         | MIR203    |
| LMF1         | MIR302F   |
| LMTK3        | MIR3115   |
| LMX1A        | MIR3120   |
| LMX1B        | MIR3188   |
| LNK1         | MIR3193   |
| LOC100128770 | MIR3196   |
| LOC100129148 | MIR31HG   |
| LOC100129175 | MIR34B    |
| LOC100129917 | MIR34C    |
| LOC100130476 | MIR3545   |
| LOC100130539 | MIR3621   |

|              |          |
|--------------|----------|
| LOC100130992 | MIR3652  |
| LOC100131320 | MIR3663  |
| LOC100132111 | MIR3687  |
| LOC100132215 | MIR375   |
| LOC100132891 | MIR378D2 |
| LOC100134391 | MIR378E  |
| LOC100144602 | MIR424   |
| LOC100190940 | MIR4287  |
| LOC100240734 | MIR4297  |
| LOC100240735 | MIR4304  |
| LOC100268168 | MIR4436A |
| LOC100288069 | MIR4453  |
| LOC100288637 | MIR4471  |
| LOC100288748 | MIR4515  |
| LOC100288842 | MIR4520A |
| LOC100288866 | MIR4520B |
| LOC100288911 | MIR4634  |
| LOC100505622 | MIR4638  |
| LOC100505782 | MIR4645  |
| LOC100506127 | MIR4656  |
| LOC100506551 | MIR4700  |
| LOC100506810 | MIR4732  |
| LOC100507003 | MIR4752  |
| LOC100653046 | MIR4770  |
| LOC100996485 | MIR4781  |
| LOC101054525 | MIR4785  |
| LOC145474    | MIR4787  |
| LOC145845    | MIR4792  |
| LOC146513    | MIR483   |
| LOC152578    | MIR503   |
| LOC153684    | MIR503HG |
| LOC283299    | MIR5091  |
| LOC283731    | MIR532   |
| LOC284395    | MIR548AO |
| LOC284412    | MIR548N  |
| LOC284801    | MIR5580  |
| LOC285084    | MIR598   |
| LOC285547    | MIR615   |
| LOC285548    | MIR622   |
| LOC285696    | MIR632   |
| LOC340017    | MIR9-1   |
| LOC348761    | MIR933   |
| LOC375295    | MIR936   |
| LOC388242    | MIR944   |
| LOC389023    | MIR96    |

|           |           |
|-----------|-----------|
| LOC389895 | MKX       |
| LOC392232 | MLNR      |
| LOC399829 | MLPH      |
| LOC400043 | MLST8     |
| LOC400456 | MLXIPL    |
| LOC401463 | MME       |
| LOC402160 | MMP25     |
| LOC440461 | MMP9      |
| LOC440896 | MNAT1     |
| LOC440925 | MNX1-AS1  |
| LOC493754 | MOGAT3    |
| LOC613038 | MOS       |
| LOC63930  | MOSPD2    |
| LOC642366 | MOXD1     |
| LOC643201 | MPP2      |
| LOC643837 | MPP5      |
| LOC643923 | MPZ       |
| LOC648987 | MPZL2     |
| LOC654342 | MRPL13    |
| LOC728463 | MRPL18    |
| LOC728739 | MRPL22    |
| LOC728989 | MRPL33    |
| LOC729911 | MRPL35    |
| LONRF3    | MRPS14    |
| LOR       | MRTO4     |
| LPAR3     | MRVI1-AS1 |
| LPIN1     | MSC       |
| LPL       | MSMO1     |
| LPPR4     | MSX1      |
| LRG1      | MSX2      |
| LRRC18    | MT1A      |
| LRRC26    | MT1B      |
| LRRC38    | MT1DP     |
| LRRC57    | MT1E      |
| LRRC71    | MT1F      |
| LRRK1     | MT1H      |
| LSR       | MT1JP     |
| LTA4H     | MT1M      |
| LTBP2     | MTBP      |
| LTF       | MTUS1     |
| LTK       | MUC17     |
| LUZP2     | MUSTN1    |
| LYSMD1    | MXRA5     |
| LYSMD2    | MYCNOS    |
| MAB21L1   | MYCT1     |

|           |            |
|-----------|------------|
| MAB21L2   | MYH10      |
| MAFB      | MYH11      |
| MAGEC2    | MYH13      |
| MAGED1    | MYO5B      |
| MAL       | MYOCD      |
| MAL2      | MYOD1      |
| MANBAL    | MYRIP      |
| MAP3K13   | MYT1       |
| MAPKAPK2  | NAGK       |
| MAPKAPK5  | NAGS       |
| MAPRE2    | NAT10      |
| MAPT-AS1  | NAT16      |
| MAPT-IT1  | NAV1       |
| MARCH11   | NBEA       |
| MAST4     | NBEAP1     |
| MATK      | NCCRP1     |
| MBIP      | NCLN       |
| MBL2      | NCOA7      |
| MBNL3     | NCR1       |
| MBP       | NCR2       |
| MC5R      | NDP        |
| MCHR2     | NDRG1      |
| MCHR2-AS1 | NEFH       |
| MCIDAS    | NEFL       |
| MCOLN2    | NELL1      |
| MCOLN3    | NEUROD2    |
| MCRS1     | NEUROG1    |
| MDGA1     | NEUROG2    |
| MECOM     | NEUROG3    |
| MECR      | NEXN       |
| MED1      | NFE2L3     |
| MED8      | NFRKB      |
| MEFV      | NGB        |
| MEIS1     | NGF        |
| MEIS1-AS3 | NGFR       |
| MEIS2     | NHLH2      |
| MEOX2     | NID2       |
| MEPCE     | NKAIN4     |
| MESP1     | NKX1-2     |
| MET       | NKX2-1     |
| METTL12   | NKX2-1-AS1 |
| METTL25   | NKX2-2     |
| MFSD4     | NKX2-3     |
| MGC12916  | NKX2-4     |
| MGC39584  | NKX2-5     |

|          |           |
|----------|-----------|
| MGEA5    | NKX2-6    |
| MGME1    | NKX2-8    |
| MICAL2   | NKX3-1    |
| MICB     | NKX3-2    |
| MIR10A   | NKX6-1    |
| MIR10B   | NKX6-2    |
| MIR124-1 | NMNAT3    |
| MIR124-2 | NMUR2     |
| MIR124-3 | NOC4L     |
| MIR1247  | NODAL     |
| MIR1253  | NOL3      |
| MIR1258  | NOL7      |
| MIR128-1 | NOS1      |
| MIR129-2 | NOTCH2NL  |
| MIR144   | NOTUM     |
| MIR1469  | NPAS1     |
| MIR183   | NPAS4     |
| MIR188   | NPBWR1    |
| MIR190B  | NPHP4     |
| MIR196A1 | NPHS2     |
| MIR196A2 | NPNT      |
| MIR196B  | NPPB      |
| MIR203   | NPPC      |
| MIR302F  | NPR1      |
| MIR3115  | NPR3      |
| MIR3120  | NPTX1     |
| MIR3131  | NPTX2     |
| MIR3185  | NPW       |
| MIR3188  | NPY       |
| MIR3193  | NPY5R     |
| MIR3196  | NR0B1     |
| MIR31HG  | NR2E1     |
| MIR34B   | NR2F2     |
| MIR34C   | NR2F2-AS1 |
| MIR3545  | NR3C2     |
| MIR3621  | NR5A2     |
| MIR3652  | NRG2      |
| MIR3663  | NRG3      |
| MIR3687  | NRIP3     |
| MIR375   | NRK       |
| MIR378D2 | NRN1      |
| MIR378E  | NRSN1     |
| MIR424   | NRXN1     |
| MIR4287  | NRXN3     |
| MIR4297  | NT5E      |

|          |         |
|----------|---------|
| MIR4304  | NTF3    |
| MIR4436A | NTN4    |
| MIR4453  | NTNG2   |
| MIR4471  | NTRK1   |
| MIR4515  | NTSR1   |
| MIR4520A | NUDT22  |
| MIR4520B | NUFIP2  |
| MIR4634  | NUPL2   |
| MIR4638  | NUSAP1  |
| MIR4645  | NXPH1   |
| MIR4656  | NXPH2   |
| MIR4700  | NXPH3   |
| MIR4727  | NXPH4   |
| MIR4732  | NXT2    |
| MIR4752  | OIP5    |
| MIR4770  | OLFML2A |
| MIR4781  | OLIG2   |
| MIR4785  | OLIG3   |
| MIR4787  | ONECUT1 |
| MIR4792  | ONECUT2 |
| MIR4801  | ONECUT3 |
| MIR483   | OPA1    |
| MIR503   | OPCML   |
| MIR503HG | OPN1LW  |
| MIR5091  | OPRD1   |
| MIR5188  | OPRK1   |
| MIR532   | OPRL1   |
| MIR548AO | OPRM1   |
| MIR548N  | OR10A6  |
| MIR5580  | OR10G2  |
| MIR598   | OR13C3  |
| MIR615   | OR13C5  |
| MIR622   | OR1F2P  |
| MIR632   | OR1G1   |
| MIR663A  | OR2W5   |
| MIR9-1   | OR4D1   |
| MIR933   | OR4D2   |
| MIR936   | OR4D5   |
| MIR944   | OR4F15  |
| MIR96    | OR5B12  |
| MKX      | OR5H15  |
| MLNR     | OR6B2   |
| MLPH     | OR6C68  |
| MLST8    | OR6C76  |
| MLXIPL   | OR7D2   |

|           |            |
|-----------|------------|
| MME       | OR9I1      |
| MMP25     | OSBPL10    |
| MMP9      | OSR1       |
| MNAT1     | OSR2       |
| MNX1      | OTOP1      |
| MNX1-AS1  | OTOP2      |
| MOGAT3    | OTOP3      |
| MOS       | OTP        |
| MOSPD2    | OTX1       |
| MOXD1     | OTX2       |
| MPP2      | OVOL1      |
| MPP5      | OXTR       |
| MPZ       | P2RX2      |
| MPZL2     | P4HA1      |
| MRPL13    | PABPC1L2A  |
| MRPL18    | PABPC1L2B  |
| MRPL22    | PADI2      |
| MRPL33    | PAK3       |
| MRPL35    | PANK3      |
| MRPS14    | PAPPA      |
| MRTO4     | PAQR5      |
| MRVI1-AS1 | PARP10     |
| MSC       | PARP11     |
| MSMO1     | PARP2      |
| MSX1      | PATE4      |
| MSX2      | PAX1       |
| MSX2P1    | PAX2       |
| MT1A      | PAX4       |
| MT1B      | PAX8       |
| MT1DP     | PAX9       |
| MT1E      | PCDH11X    |
| MT1F      | PCDH11Y    |
| MT1G      | PCDH19     |
| MT1H      | PCDH8      |
| MT1JP     | PCDH9      |
| MT1M      | PCED1B-AS1 |
| MTBP      | PCP4L1     |
| MTUS1     | PCSK2      |
| MUC12     | PCSK9      |
| MUC17     | PDE1C      |
| MUSTN1    | PDE2A      |
| MXRA5     | PDE4B      |
| MYCNOS    | PDE4D      |
| MYCT1     | PDGFA      |
| MYH10     | PDGFB      |

|            |                  |
|------------|------------------|
| MYH11      | PDGFRA           |
| MYH13      | PDLIM5           |
| MYO5B      | PDP1             |
| MYOCD      | PDX1             |
| MYOD1      | PDX1-AS1         |
| MYRIP      | PDYN             |
| MYT1       | PENK             |
| NAGK       | PEPD             |
| NAGS       | PET117           |
| NAT10      | PEX5L            |
| NAT16      | PGCP1            |
| NAV1       | PGLS             |
| NBEA       | PGM5             |
| NBEAP1     | PGM5P2           |
| NCCRP1     | PGR              |
| NCLN       | PGS1             |
| NCOA7      | PHOX2A           |
| NCR1       | PID1             |
| NCR2       | PIGV             |
| NDP        | PIK3CD           |
| NDRG1      | PIK3R1           |
| NDRG4      | PIK3R5           |
| NEFH       | PINX1            |
| NEFL       | PIP4K2A          |
| NELL1      | PITX3            |
| NEUROD1    | PKP2             |
| NEUROD2    | PLA2G10          |
| NEUROD4    | PLA2G2A          |
| NEUROG1    | PLAGL1           |
| NEUROG2    | PLB1             |
| NEUROG3    | PLCG2            |
| NEXN       | PLD1             |
| NFE2L3     | PLD5             |
| NFIX       | PLEKHA8          |
| NFRKB      | PLEKHD1          |
| NGB        | PLS3             |
| NGF        | PLXDC1           |
| NGFR       | PMP22            |
| NHLH2      | PNOC             |
| NID2       | PNPLA5           |
| NKAIN4     | POC1B            |
| NKX1-2     | POC1B-<br>GALNT4 |
| NKX2-1     | POLR2A           |
| NKX2-1-AS1 | POLR3A           |
| NKX2-2     | POLR3E           |



|           |              |
|-----------|--------------|
| NKX2-3    | POM121L2     |
| NKX2-4    | POMC         |
| NKX2-5    | POMT2        |
| NKX2-6    | POP4         |
| NKX2-8    | POU1F1       |
| NKX3-1    | POU2F2       |
| NKX3-2    | POU2F3       |
| NKX6-1    | POU3F4       |
| NKX6-2    | POU4F1       |
| NMNAT3    | POU4F2       |
| NMUR2     | POU4F3       |
| NOC4L     | PP12613      |
| NODAL     | PPAPDC1A     |
| NOL3      | PPARG        |
| NOL7      | PPFIBP2      |
| NOS1      | PPM1D        |
| NOTCH2NL  | PPM1J        |
| NOTO      | PPM1N        |
| NOTUM     | PPP1R12B     |
| NPAS1     | PPP1R14C     |
| NPAS3     | PPP1R15A     |
| NPAS4     | PPP6R3       |
| NPBWR1    | PRAC1        |
| NPFFR1    | PRDM12       |
| NPHP4     | PRDM13       |
| NPHS2     | PRDM6        |
| NPNT      | PRDM8        |
| NPPB      | PRDX3        |
| NPPC      | PRG2         |
| NPR1      | PRICKLE2-AS1 |
| NPR3      | PRIMA1       |
| NPTX1     | PRKAB2       |
| NPTX2     | PRKCB        |
| NPW       | PRKCH        |
| NPY       | PRKCQ-AS1    |
| NPY5R     | PRKG2        |
| NR0B1     | PRKRIR       |
| NR2E1     | PRLHR        |
| NR2F1     | PRMT3        |
| NR2F1-AS1 | PRMT8        |
| NR2F2     | PROK2        |
| NR2F2-AS1 | PROKR1       |
| NR3C2     | PROKR2       |
| NR5A2     | PROM1        |
| NRG2      | PROX1        |

|         |          |                        |
|---------|----------|------------------------|
| NRG3    | PRPF31   |                        |
| NRIP3   | PRPH     |                        |
| NRK     | PRR15    |                        |
| NRN1    | PRR21    |                        |
| NRSN1   | PRRG1    |                        |
| NRXN1   | PRRX1    |                        |
| NRXN3   | PRSS45   |                        |
| NSG1    | PRUNE2   |                        |
| NT5E    | PSAP     |                        |
| NTF3    | PSD2     |                        |
| NTN4    | PTAR1    |                        |
| NTNG2   | PTF1A    |                        |
| NTRK1   | PTGDR    |                        |
| NTSR1   | PTGER2   |                        |
| NUBPL   | PTGER3   |                        |
| NUDT22  | PTGER4   |                        |
| NUFIP2  |          | PTGER4P2-<br>CDK2AP2P2 |
| NUPL2   | PTGS2    |                        |
| NUSAP1  | PTH2     |                        |
| NXPH1   | PTHLH    |                        |
| NXPH2   | PTK2B    |                        |
| NXPH3   | PTPN1    |                        |
| NXPH4   | PTPN23   |                        |
| NXT2    | PTPN3    |                        |
| OIP5    | PTPN5    |                        |
| OLFM3   | PTPRN    |                        |
| OLFML2A | PTPRT    |                        |
| OLIG2   | PTRF     |                        |
| OLIG3   | PUM1     |                        |
| ONECUT1 | PURA     |                        |
| ONECUT2 | PYDC1    |                        |
| ONECUT3 | PYY      |                        |
| OPA1    | QRFPR    |                        |
| OPCML   | QRSL1    |                        |
| OPN1LW  | RAB37    |                        |
| OPRD1   | RAB3B    |                        |
| OPRK1   | RAB6B    |                        |
| OPRL1   | RAB6C    |                        |
| OPRM1   | RABGAP1L |                        |
| OR10A6  | RACGAP1P |                        |
| OR10G2  | RAD1     |                        |
| OR13C3  | RAD51AP2 |                        |
| OR13C5  | RAD54B   |                        |
| OR1F2P  | RAET1K   |                        |
| OR1G1   | RAI14    |                        |

|           |            |
|-----------|------------|
| OR1I1     | RAI2       |
| OR1L3     | RAPSN      |
| OR2W5     | RARB       |
| OR4B1     | RASEF      |
| OR4D1     | RASGEF1A   |
| OR4D2     | RASGRF1    |
| OR4D5     | RASGRF2    |
| OR4F15    | RASL11B    |
| OR5B12    | RASSF10    |
| OR5H15    | RASSF5     |
| OR6B2     | RAX        |
| OR6C68    | RBFOX1     |
| OR6C76    | RBKS       |
| OR7D2     | RBM11      |
| OR9I1     | RBM14      |
| OSBPL10   | RBM14-RBM4 |
| OSR1      | RBM20      |
| OSR2      | RBM4       |
| OTOP1     | RBM42      |
| OTOP2     | RBMS1      |
| OTOP3     | RBP4       |
| OTP       | RBP7       |
| OTX1      | RBPJ       |
| OTX2      | RC3H2      |
| OTX2-AS1  | RDH13      |
| OVOL1     | RDH8       |
| OVOL2     | RDM1       |
| OXTR      | REEP1      |
| P2RX2     | RELN       |
| P4HA1     | RESP18     |
| PABPC1L2A | RET        |
| PABPC1L2B | RFC1       |
| PADI2     | RFPL2      |
| PAK3      | RFPL4B     |
| PANK3     | RFTN2      |
| PAPL      | RFX3       |
| PAPPA     | RFX6       |
| PAQR5     | RFX7       |
| PARP10    | RFXAP      |
| PARP11    | RGCC       |
| PARP2     | RGL3       |
| PATE4     | RGS10      |
| PAX1      | RGS6       |
| PAX2      | RGS7       |
| PAX3      | RGS7BP     |

|            |           |
|------------|-----------|
| PAX4       | RGS9BP    |
| PAX5       | RHOU      |
| PAX6       | RIPK1     |
| PAX7       | RIPK3     |
| PAX8       | RIPK4     |
| PAX9       | RNASE4    |
| PAXBPI     | RND1      |
| PCDH11X    | RNF141    |
| PCDH11Y    | RNF207    |
| PCDH19     | RNF220    |
| PCDH8      | RNF6      |
| PCDH9      | RNMT      |
| PCED1B-AS1 | RNU11     |
| PCP4L1     | ROCK1P1   |
| PCSK2      | ROR1      |
| PCSK9      | ROR2      |
| PDCL       | RPF1      |
| PDE1C      | RPH3A     |
| PDE2A      | RPL10A    |
| PDE4A      | RPL23     |
| PDE4B      | RPL26L1   |
| PDE4D      | RPL27     |
| PDE4DIP    | RPL29     |
| PDGFA      | RPL31     |
| PDGFB      | RPL34     |
| PDGFRA     | RPL34-AS1 |
| PDLIM5     | RPL5      |
| PDP1       | RPL9      |
| PDX1       | RPP25     |
| PDX1-AS1   | RPPH1     |
| PDYN       | RPRD2     |
| PENK       | RPS12     |
| PEPD       | RPS26     |
| PET117     | RPS27     |
| PEX5L      | RPUSD4    |
| PGCP1      | RRAS2     |
| PGLS       | RRP1      |
| PGM5       | RSPO2     |
| PGM5-AS1   | RSPO3     |
| PGM5P2     | RSRC1     |
| PGR        | RSRC2     |
| PGS1       | RTBDN     |
| PHACTR3    | RTN2      |
| PHOX2A     | RTN4IP1   |
| PHOX2B     | RTN4RL1   |

|                  |             |
|------------------|-------------|
| PID1             | RUNX1       |
| PIGV             | RUNX1T1     |
| PIK3CD           | RUNX3       |
| PIK3R1           | RYR2        |
| PIK3R5           | S100A12     |
| PINX1            | S100A14     |
| PIP4K2A          | S100A7      |
| PITX1            | S100A7A     |
| PITX2            | S100A8      |
| PITX3            | SAE1        |
| PKD2L1           | SALL1       |
| PKP2             | SALL2       |
| PLA2G10          | SAMD11      |
| PLA2G2A          | SART1       |
| PLAGL1           | SATB1       |
| PLB1             | SATB2-AS1   |
| PLCG2            | SCAMP5      |
| PLD1             | SCARNA10    |
| PLD5             | SCGN        |
| PLEKHA8          | SCN5A       |
| PLEKHD1          | SCNM1       |
| PLS3             | SCNN1B      |
| PLXDC1           | SCP2        |
| PMP22            | SCRIB       |
| PNOC             | SCRT1       |
| PNPLA5           | SCRT2       |
| POC1B            | SCTR        |
| POC1B-<br>GALNT4 | SDE2        |
| POLR2A           | SDF2L1      |
| POLR3A           | SEC16B      |
| POLR3E           | SEC22A      |
| POM121L2         | SEMA3F      |
| POMC             | SENP7       |
| POMT2            | SERPINA7    |
| POP4             | SERPINB6    |
| POU1F1           | SERTAD4     |
| POU2F2           | SERTAD4-AS1 |
| POU2F3           | SEZ6        |
| POU3F4           | SFMBT2      |
| POU4F1           | SFRP1       |
| POU4F2           | SFRP5       |
| POU4F3           | SFTA3       |
| PP12613          | SFTPC       |
| PPAPDC1A         | SGPP2       |
| PPARG            | SH2D1B      |

|              |             |
|--------------|-------------|
| PPFIBP2      | SH2D3A      |
| PPIP5K1      | SH2D3C      |
| PPM1D        | SH3BP5      |
| PPM1J        | SH3GL2      |
| PPM1N        | SH3RF3      |
| PPP1R12B     | SH3RF3-AS1  |
| PPP1R14C     | SHE         |
| PPP1R15A     | SHF         |
| PPP2R2C      | SHH         |
| PPP6R3       | SHISA2      |
| PRAC1        | SHISA3      |
| PRAC2        | SHISA6      |
| PRDM12       | SHISA7      |
| PRDM13       | SHISA8      |
| PRDM14       | SHISA9      |
| PRDM6        | SHOX        |
| PRDM8        | SHOX2       |
| PRDX3        | SIDT1       |
| PRG2         | SIGIRR      |
| PRICKLE2-AS1 | SIGLEC14    |
| PRIMA1       | SIGMAR1     |
| PRKAB2       | SIM2        |
| PRKCB        | SIX1        |
| PRKCH        | SIX2        |
| PRKCQ-AS1    | SIX3        |
| PRKCZ        | SIX3-AS1    |
| PRKG2        | SKAP1       |
| PRKRIR       | SKAP2       |
| PRLHR        | SKOR1       |
| PRMT3        | SLC12A4     |
| PRMT8        | SLC15A1     |
| PROK2        | SLC16A12    |
| PROKR1       | SLC16A6     |
| PROKR2       | SLC17A6     |
| PROM1        | SLC17A7     |
| PROX1        | SLC18A3     |
| PRPF31       | SLC1A2      |
| PRPH         | SLC22A31    |
| PRR15        | SLC24A2     |
| PRR21        | SLC24A3     |
| PRRG1        | SLC24A4     |
| PRRX1        | SLC25A18    |
| PRSS16       | SLC25A48    |
| PRSS22       | SLC26A10    |
| PRSS45       | SLC26A4-AS1 |

|                        |            |
|------------------------|------------|
| PRUNE2                 | SLC26A5    |
| PSAP                   | SLC30A2    |
| PSD2                   | SLC30A3    |
| PTAR1                  | SLC32A1    |
| PTF1A                  | SLC35D3    |
| PTGDR                  | SLC35F3    |
| PTGER2                 | SLC35F4    |
| PTGER3                 | SLC35F5    |
| PTGER4                 | SLC38A3    |
| PTGER4P2-<br>CDK2AP2P2 | SLC38A4    |
| PTGS2                  | SLC38A6    |
| PTH2                   | SLC4A1     |
| PTHLH                  | SLC4A8     |
| PTK2B                  | SLC5A8     |
| PTPN1                  | SLC6A1     |
| PTPN23                 | SLC6A11    |
| PTPN3                  | SLC6A17    |
| PTPN5                  | SLC6A3     |
| PTPRD                  | SLC6A4     |
| PTPRN                  | SLC6A5     |
| PTPRT                  | SLC7A10    |
| PTRF                   | SLC7A14    |
| PUM1                   | SLC7A2     |
| PURA                   | SLC7A5P2   |
| PVALB                  | SLC8A3     |
| PYDC1                  | SLC9A2     |
| PYY                    | SLC9A3     |
| QRFPR                  | SLCO4A1    |
| QRSL1                  | SLCO5A1    |
| RAB37                  | SLFN11     |
| RAB3B                  | SLFN12L    |
| RAB6B                  | SLFN14     |
| RAB6C                  | SLIT3      |
| RABGAP1L               | SLITRK3    |
| RACGAP1P               | SMAD5      |
| RAD1                   | SMDT1      |
| RAD51AP2               | SMEK2      |
| RAD54B                 | SMIM14     |
| RAET1K                 | SMOC2      |
| RAI14                  | SNAP25     |
| RAI2                   | SNAP25-AS1 |
| RAPSN                  | SNAR-B1    |
| RARB                   | SNAR-B2    |
| RASEF                  | SND1-IT1   |
| RASGEF1A               | SNED1      |

|            |             |
|------------|-------------|
| RASGRF1    | SNORA21     |
| RASGRF2    | SNORA57     |
| RASL11B    | SNORA76     |
| RASSF10    | SNORD101    |
| RASSF5     | SNORD114-3  |
| RAX        | SNORD114-4  |
| RBFOX1     | SNORD116-28 |
| RBKS       | SNORD1A     |
| RBM11      | SNORD1B     |
| RBM14      | SNTB1       |
| RBM14-RBM4 | SNTG2       |
| RBM20      | SNX31       |
| RBM4       | SNX5        |
| RBM42      | SOCS2       |
| RBMS1      | SOCS2-AS1   |
| RBP4       | SORBS2      |
| RBP7       | SORCS1      |
| RBPJ       | SORCS3      |
| RC3H2      | SOWAHA      |
| RDH13      | SOWAHB      |
| RDH8       | SOX1        |
| RDM1       | SOX14       |
| REEP1      | SOX17       |
| RELN       | SOX3        |
| RESP18     | SOX7        |
| RET        | SP5         |
| REXO1L2P   | SP7         |
| RFC1       | SP9         |
| RFPL2      | SPAG6       |
| RFPL4B     | SPATA2      |
| RFTN2      | SPATA31C1   |
| RFX3       | SPATA31D4   |
| RFX6       | SPCS2       |
| RFX7       | SPHKAP      |
| RFXAP      | SPINT1      |
| RGCC       | SPNS2       |
| RGL3       | SPOCK1      |
| RGS10      | SPON1       |
| RGS6       | SPON2       |
| RGS7       | SRC         |
| RGS7BP     | SRD5A2      |
| RGS9BP     | SRGAP2-AS1  |
| RHOU       | SRP68       |
| RIPK1      | SRSF3       |
| RIPK3      | SST         |



|           |             |
|-----------|-------------|
| RIPK4     | SSTR2       |
| RNASE4    | ST3GAL6-AS1 |
| RND1      | ST6GAL1     |
| RNF128    | ST6GAL2     |
| RNF141    | ST6GALNAC1  |
| RNF207    | ST6GALNAC2  |
| RNF220    | ST8SIA5     |
| RNF6      | ST8SIA6     |
| RNMT      | STAC        |
| RNPS1     | STAM        |
| RNU11     | STC2        |
| ROBO3     | STK16       |
| ROCK1P1   | STK3        |
| ROR1      | STMN2       |
| ROR2      | STX11       |
| RPF1      | STX8        |
| RPH3A     | SUPT5H      |
| RPL10A    | SURF6       |
| RPL23     | SUSD4       |
| RPL26L1   | SUSD5       |
| RPL27     | SUV420H2    |
| RPL29     | SV2B        |
| RPL31     | SV2C        |
| RPL34     | SYCP2L      |
| RPL34-AS1 | SYK         |
| RPL5      | SYMPK       |
| RPL9      | SYN3        |
| RPP25     | SYNDIG1     |
| RPPH1     | SYNE1       |
| RPRD2     | SYNPR       |
| RPS12     | SYT15       |
| RPS26     | SYT2        |
| RPS27     | SYT3        |
| RPSAP52   | SYT6        |
| RPUSD4    | SZT2        |
| RRAD      | T           |
| RRAS2     | TACR1       |
| RRP1      | TARBP2      |
| RSPO1     | TARS        |
| RSPO2     | TBC1D1      |
| RSPO3     | TBC1D21     |
| RSPO4     | TBC1D30     |
| RSRC1     | TBC1D8B     |
| RSRC2     | TBCCD1      |
| RTBDN     | TBR1        |

|             |            |
|-------------|------------|
| RTN2        | TBX1       |
| RTN4IP1     | TBX18      |
| RTN4RL1     | TBX2       |
| RUNX1       | TBX20      |
| RUNX1T1     | TBX3       |
| RUNX3       | TC2N       |
| RYR2        | TCEAL6     |
| S100A12     | TCERG1L    |
| S100A14     | TCF15      |
| S100A7      | TCF24      |
| S100A7A     | TCP1       |
| S100A8      | TDGF1      |
| SAE1        | TDP2       |
| SALL1       | TDRD10     |
| SALL2       | TECTA      |
| SAMD11      | TERF2      |
| SART1       | TESK1      |
| SATB1       | TEX10      |
| SATB2       | TFAP2A-AS1 |
| SATB2-AS1   | TFAP2C     |
| SCAMP5      | TFCP2L1    |
| SCARNA10    | TFPT       |
| SCGN        | TGFA       |
| SCN5A       | TGFBI      |
| SCNM1       | TGFBR3L    |
| SCNN1B      | THBD       |
| SCP2        | THRB       |
| SCRIB       | THRB-AS1   |
| SCRT1       | THSD7B     |
| SCRT2       | TIA1       |
| SCTR        | TIFAB      |
| SDE2        | TLE6       |
| SDF2L1      | TLL1       |
| SEC16B      | TLR2       |
| SEC22A      | TLX1       |
| SELL        | TLX1NB     |
| SEMA3A      | TLX2       |
| SEMA3F      | TLX3       |
| SENP7       | TMEM132C   |
| SEPT2       | TMEM132D   |
| SERPINA7    | TMEM132E   |
| SERPINB6    | TMEM155    |
| SERTAD4     | TMEM163    |
| SERTAD4-AS1 | TMEM171    |
| SEZ6        | TMEM176A   |

|            |           |
|------------|-----------|
| SFMBT2     | TMEM176B  |
| SFRP1      | TMEM18    |
| SFRP5      | TMEM215   |
| SFTA3      | TMEM229A  |
| SFTPC      | TMEM229B  |
| SGPP2      | TMEM233   |
| SH2D1B     | TMEM235   |
| SH2D3A     | TMEM30B   |
| SH2D3C     | TMEM38B   |
| SH3BP5     | TMEM59    |
| SH3GL2     | TMEM59L   |
| SH3RF3     | TMEM61    |
| SH3RF3-AS1 | TMEM66    |
| SHE        | TMEM79    |
| SHF        | TMOD1     |
| SHH        | TMOD2     |
| SHISA2     | TMPRSS2   |
| SHISA3     | TMX1      |
| SHISA6     | TNFRSF11A |
| SHISA7     | TNFRSF19  |
| SHISA8     | TNFRSF8   |
| SHISA9     | TNFSF9    |
| SHOX       | TNK1      |
| SHOX2      | TOP1P2    |
| SIDT1      | TP73      |
| SIGIRR     | TPBG      |
| SIGLEC14   | TPR       |
| SIGMAR1    | TPRKB     |
| SIM1       | TRABD2A   |
| SIM2       | TRABD2B   |
| SIX1       | TRADD     |
| SIX2       | TRH       |
| SIX3       | TRHDE-AS1 |
| SIX3-AS1   | TRIM34    |
| SIX6       | TRIM35    |
| SKAP1      | TRIM36    |
| SKAP2      | TRIM41    |
| SKOR1      | TRIM46    |
| SKOR2      | TRIM54    |
| SLC12A4    | TRIM67    |
| SLC15A1    | TRIM72    |
| SLC16A12   | TRMT5     |
| SLC16A6    | TRPC5     |
| SLC17A6    | TRPC6     |
| SLC17A7    | TRPM4     |

|             |            |
|-------------|------------|
| SLC18A2     | TRPT1      |
| SLC18A3     | TSC22D2    |
| SLC1A2      | TSGA13     |
| SLC22A31    | TSLP       |
| SLC24A2     | TSPEAR     |
| SLC24A3     | TTC39A     |
| SLC24A4     | TTL6       |
| SLC25A18    | TUBA4A     |
| SLC25A48    | TUBA4B     |
| SLC26A10    | TWIST1     |
| SLC26A4     | UBASH3B    |
| SLC26A4-AS1 | UBE2D3     |
| SLC26A5     | UBE2F      |
| SLC27A6     | UBE2F-SCLY |
| SLC30A2     | UBE4A      |
| SLC30A3     | UBTD2      |
| SLC32A1     | UCN        |
| SLC35D3     | UCP1       |
| SLC35F3     | UG0898H09  |
| SLC35F4     | ULBP1      |
| SLC35F5     | ULBP2      |
| SLC38A3     | UNC5A      |
| SLC38A4     | UNC5B-AS1  |
| SLC38A6     | UNC5C      |
| SLC4A1      | UNC5D      |
| SLC4A11     | UNCX       |
| SLC4A8      | UPB1       |
| SLC5A7      | UQCRC2     |
| SLC5A8      | USH1G      |
| SLC6A1      | USP42      |
| SLC6A11     | USP50      |
| SLC6A17     | UTF1       |
| SLC6A2      | UTRN       |
| SLC6A20     | VAV3-AS1   |
| SLC6A3      | VAX1       |
| SLC6A4      | VAX2       |
| SLC6A5      | VDR        |
| SLC6A7      | VENTX      |
| SLC7A10     | VGFB       |
| SLC7A14     | VGLL4      |
| SLC7A2      | VIPR1      |
| SLC7A5P2    | VIPR2      |
| SLC8A3      | VMA21      |
| SLC9A2      | VPS33A     |
| SLC9A3      | VPS51      |

|             |            |
|-------------|------------|
| SLCO4A1     | VRK3       |
| SLCO5A1     | VSIG2      |
| SLFN11      | VSTM2B     |
| SLFN12L     | VTRNA2-1   |
| SLFN14      | VWA2       |
| SLIT3       | VWA5B2     |
| SLITRK3     | VWC2       |
| SMAD5       | VWC2L-IT1  |
| SMDT1       | WASH2P     |
| SMEK2       | WBSCR17    |
| SMIM14      | WDR16      |
| SMOC2       | WDR33      |
| SMUG1       | WDR4       |
| SNAP25      | WIF1       |
| SNAP25-AS1  | WLS        |
| SNAR-A1     | WNT1       |
| SNAR-A10    | WNT10A     |
| SNAR-A11    | WNT11      |
| SNAR-A14    | WNT2       |
| SNAR-A2     | WNT2B      |
| SNAR-A3     | WNT3       |
| SNAR-A4     | WNT3A      |
| SNAR-A5     | WNT6       |
| SNAR-A6     | WNT7A      |
| SNAR-A7     | WNT7B      |
| SNAR-A8     | WNT9B      |
| SNAR-A9     | WRAP73     |
| SNAR-B1     | WTH3DI     |
| SNAR-B2     | XIRP1      |
| SNAR-C1     | XKR7       |
| SNAR-C2     | XRRA1      |
| SNAR-C5     | YBX3P1     |
| SND1-IT1    | YWHAE      |
| SNED1       | ZACN       |
| SNHG7       | ZBTB4      |
| SNORA21     | ZCCHC16    |
| SNORA57     | ZCWPW1     |
| SNORA76     | ZDHHC22    |
| SNORD101    | ZDHHC5     |
| SNORD114-3  | ZFAND5     |
| SNORD114-4  | ZFHX3      |
| SNORD116-28 | ZFP91      |
| SNORD1A     | ZFP91-CNTF |
| SNORD1B     | ZFPL1      |
| SNRPA1      | ZFPM2      |

|            |            |
|------------|------------|
| SNTB1      | ZFYVE28    |
| SNTG2      | ZIC1       |
| SNX16      | ZIC2       |
| SNX31      | ZIC3       |
| SNX5       | ZIC4       |
| SOCS2      | ZIC5       |
| SOCS2-AS1  | ZMYND15    |
| SORBS2     | ZNF106     |
| SORCS1     | ZNF207     |
| SORCS3     | ZNF259     |
| SOWAHA     | ZNF385B    |
| SOWAHB     | ZNF436     |
| SOX1       | ZNF471     |
| SOX14      | ZNF473     |
| SOX17      | ZNF484     |
| SOX18      | ZNF503     |
| SOX3       | ZNF503-AS2 |
| SOX5       | ZNF546     |
| SOX7       | ZNF706     |
| SOX8       | ZNF77      |
| SP5        | ZNF775     |
| SP6        | ZNF804B    |
| SP7        | ZNF827     |
| SP8        | ZNF830     |
| SP9        | ZNF860     |
| SPAG6      | ZSCAN5B    |
| SPATA2     | ZSWIM6     |
| SPATA31C1  |            |
| SPATA31D4  |            |
| SPCS2      |            |
| SPHKAP     |            |
| SPINT1     |            |
| SPNS2      |            |
| SPOCK1     |            |
| SPON1      |            |
| SPON2      |            |
| SRC        |            |
| SRD5A2     |            |
| SRGAP2-AS1 |            |
| SRP68      |            |
| SRSF3      |            |
| SRSF7      |            |
| SST        |            |
| SSTR1      |            |
| SSTR2      |            |

SSTR5  
ST14  
ST3GAL6-AS1  
ST5  
ST6GAL1  
ST6GAL2  
ST6GALNAC1  
ST6GALNAC2  
ST8SIA5  
ST8SIA6  
STAC  
STAM  
STC2  
STK16  
STK3  
STMN2  
STX11  
STX6  
STX8  
SUPT5H  
SURF6  
SUSD4  
SUSD5  
SUV420H2  
SV2B  
SV2C  
SYCP2L  
SYK  
SYMPK  
SYN3  
SYNDIG1  
SYNE1  
SYNPR  
SYT15  
SYT2  
SYT3  
SYT6  
SZT2  
T  
TAC1  
TACR1  
TAL1  
TARBP2  
TARS  
TBC1D1

TBC1D21  
TBC1D3  
TBC1D30  
TBC1D3C  
TBC1D3F  
TBC1D3H  
TBC1D8B  
TBCCD1  
TBR1  
TBX1  
TBX15  
TBX18  
TBX2  
TBX20  
TBX3  
TBX4  
TBX5  
TBX5-AS1  
TC2N  
TCEAL6  
TCERG1L  
TCF15  
TCF21  
TCF24  
TCP1  
TDGF1  
TDP2  
TDRD10  
TECTA  
TERF2  
TESK1  
TEX10  
TFAP2A  
TFAP2A-AS1  
TFAP2B  
TFAP2C  
TFAP2D  
TFCP2L1  
TFPT  
TGFA  
TGFB1  
TGFB3L  
TGM5  
THBD  
THRB



THRB-AS1  
THSD7B  
TIA1  
TIFAB  
TLE6  
TLL1  
TLR2  
TLX1  
TLX1NB  
TLX2  
TLX3  
TMEM132C  
TMEM132D  
TMEM132E  
TMEM155  
TMEM163  
TMEM171  
TMEM176A  
TMEM176B  
TMEM18  
TMEM215  
TMEM229A  
TMEM229B  
TMEM233  
TMEM235  
TMEM30B  
TMEM38B  
TMEM45B  
TMEM59  
TMEM59L  
TMEM61  
TMEM66  
TMEM79  
TMOD1  
TMOD2  
TMPRSS2  
TMX1  
TNFRSF11A  
TNFRSF19  
TNFRSF8  
TNFSF11  
TNFSF9  
TNK1  
TNS4  
TOP1P2

TP73  
TPBG  
TPM3  
TPR  
TPRKB  
TRABD2A  
TRABD2B  
TRADD  
TRH  
TRHDE-AS1  
TRIM34  
TRIM35  
TRIM36  
TRIM41  
TRIM46  
TRIM54  
TRIM67  
TRIM72  
TRMT5  
TRPA1  
TRPC5  
TRPC6  
TRPM4  
TRPT1  
TSC22D2  
TSGA13  
TSLP  
TSPEAR  
TTC39A  
TTLL6  
TUBA4A  
TUBA4B  
TWIST1  
UBASH3B  
UBC  
UBE2D3  
UBE2F  
UBE2F-SCLY  
UBE4A  
UBTD2  
UCN  
UCP1  
UG0898H09  
ULBP1  
ULBP2

UNC5A  
UNC5B-AS1  
UNC5C  
UNC5D  
UNCX  
UPB1  
UQCRC2  
USH1G  
USP42  
USP44  
USP50  
USPL1  
UTF1  
UTRN  
VAV3-AS1  
VAX1  
VAX2  
VDR  
VENTX  
VGF  
VGLL2  
VGLL4  
VIPR1  
VIPR2  
VMA21  
VPS33A  
VPS51  
VRK3  
VSIG2  
VSTM2B  
VSX1  
VSX2  
VTRNA2-1  
VWA2  
VWA5B2  
VWC2  
VWC2L-IT1  
WASH2P  
WBSCR17  
WDR16  
WDR33  
WDR4  
WIF1  
WLS  
WNT1

WNT10A  
WNT10B  
WNT11  
WNT16  
WNT2  
WNT2B  
WNT3  
WNT3A  
WNT6  
WNT7A  
WNT7B  
WNT8B  
WNT9B  
WRAP73  
WT1  
WT1-AS  
WTH3DI  
XIRP1  
XKR7  
XARRA1  
YBX3P1  
YWHAE  
ZACN  
ZBTB4  
ZCCHC16  
ZCWPW1  
ZDHHC22  
ZDHHC5  
ZFAND5  
ZFH3  
ZFP91  
ZFP91-CNTF  
ZFPL1  
ZFPM2  
ZFYVE28  
ZIC1  
ZIC2  
ZIC3  
ZIC4  
ZIC5  
ZMYND15  
ZNF106  
ZNF207  
ZNF259  
ZNF385B

ZNF436  
ZNF462  
ZNF471  
ZNF473  
ZNF484  
ZNF503  
ZNF503-AS2  
ZNF546  
ZNF555  
ZNF706  
ZNF77  
ZNF775  
ZNF804B  
ZNF827  
ZNF830  
ZNF860  
ZSCAN5B  
ZSWIM6

**Table S5. IC<sub>50</sub> of compounds\* used in the chemical screen**

| Name                                 | IC <sub>50</sub> (-log mM) |      |       |
|--------------------------------------|----------------------------|------|-------|
|                                      | Normal                     | P5K  | Δ     |
| <b>MI-2 (hydrochloride)</b>          | 2.18                       | 3.81 | 1.64  |
| Sinefungin                           | <1.5                       | 2.43 | 0.93  |
| CAY10591                             | 1.95                       | 2.55 | 0.60  |
| MS-275                               | 1.87                       | 2.46 | 0.59  |
| Tubastatin A (trifluoroacetate salt) | 1.61                       | 2.07 | 0.46  |
| Tenovin-6                            | 2.53                       | 2.82 | 0.30  |
| Decitabine                           | <1.5                       | 1.80 | 0.30  |
| (-)-Neplanocin A                     | <1.5                       | 1.68 | 0.18  |
| UNC0224                              | 2.49                       | 2.61 | 0.12  |
| 4-iodo-SAHA                          | 2.31                       | 2.41 | 0.10  |
| HC Toxin                             | 3.07                       | 3.17 | 0.09  |
| AGK2                                 | 2.06                       | 2.12 | 0.06  |
| UNC0638                              | 2.54                       | 2.59 | 0.05  |
| CAY10398                             | 2.47                       | 2.49 | 0.02  |
| Piceatannol                          | 1.94                       | 1.94 | 0.00  |
| Apicidin                             | 2.90                       | 2.89 | -0.01 |
| SB 939                               | 2.73                       | 2.71 | -0.02 |
| Trichostatin A                       | 2.75                       | 2.68 | -0.08 |
| M 344                                | 2.50                       | 2.40 | -0.10 |
| Suberohydroxamic Acid                | 2.18                       | 2.07 | -0.11 |
| SAHA                                 | 2.38                       | 2.23 | -0.15 |
| Chidamide                            | 2.51                       | 2.28 | -0.23 |
| 2,4-Pyridinedicarboxylic Acid        | 1.75                       | <1.5 | -0.25 |
| (S)-HDAC-42                          | 2.58                       | 2.32 | -0.27 |
| Ellagic Acid                         | 2.07                       | <1.5 | -0.57 |
| Mirin                                | 2.65                       | 2.07 | -0.58 |
| Oxamflatin                           | 2.10                       | <1.5 | -0.60 |
| Pyroxamide                           | 2.13                       | <1.5 | -0.63 |
| Tenovin-1                            | 2.14                       | <1.5 | -0.64 |
| (-)-JQ1                              | <1.5                       | <1.5 | NA    |
| (+)-JQ1                              | <1.5                       | <1.5 | NA    |
| 2',3',5'-triacetyl-5-Azacytidine     | <1.5                       | <1.5 | NA    |
| 2,4-DPD                              | <1.5                       | <1.5 | NA    |
| 2-PCPA (hydrochloride)               | <1.5                       | <1.5 | NA    |
| 3-amino Benzamide                    | <1.5                       | <1.5 | NA    |
| 3-Deazaneplanocin A                  | <1.5                       | <1.5 | NA    |
| 5-Azacytidine                        | <1.5                       | <1.5 | NA    |
| AG-014699                            | <1.5                       | <1.5 | NA    |
| AMI-1 (sodium salt)                  | <1.5                       | <1.5 | NA    |

|                                   |      |      |    |
|-----------------------------------|------|------|----|
| Anacardic Acid                    | <1.5 | <1.5 | NA |
| BSI-201                           | <1.5 | <1.5 | NA |
| C646                              | <1.5 | <1.5 | NA |
| CAY10433                          | <1.5 | <1.5 | NA |
| CAY10603                          | <1.5 | <1.5 | NA |
| CBHA                              | <1.5 | <1.5 | NA |
| Cl-Amidine                        | <1.5 | <1.5 | NA |
| Daminozide                        | <1.5 | <1.5 | NA |
| Delphinidin chloride              | <1.5 | <1.5 | NA |
| DMOG                              | <1.5 | <1.5 | NA |
| EX-527                            | <1.5 | <1.5 | NA |
| F-Amidine (trifluoroacetate salt) | <1.5 | <1.5 | NA |
| Garcinol                          | <1.5 | <1.5 | NA |
| Gemcitabine                       | <1.5 | <1.5 | NA |
| GSK-J1 (sodium salt)              | <1.5 | <1.5 | NA |
| GSK-J4 (hydrochloride)            | <1.5 | <1.5 | NA |
| HNHA                              | <1.5 | <1.5 | NA |
| IOX1                              | <1.5 | <1.5 | NA |
| Isoliquiritigenin                 | <1.5 | <1.5 | NA |
| JGB1741                           | <1.5 | <1.5 | NA |
| Lomeguatrib                       | <1.5 | <1.5 | NA |
| MI-nc (hydrochloride)             | <1.5 | <1.5 | NA |
| Nicotinamide                      | <1.5 | <1.5 | NA |
| N-Oxalylglycine                   | <1.5 | <1.5 | NA |
| PCI 4051                          | <1.5 | <1.5 | NA |
| PFI-1                             | <1.5 | <1.5 | NA |
| Phthalazinone pyrazole            | <1.5 | <1.5 | NA |
| Pimelic Diphenylamide 106         | <1.5 | <1.5 | NA |
| RG-108                            | <1.5 | <1.5 | NA |
| S-Adenosylhomocysteine            | <1.5 | <1.5 | NA |
| Salermide                         | <1.5 | <1.5 | NA |
| Scriptaid                         | <1.5 | <1.5 | NA |
| Sirtinol                          | <1.5 | <1.5 | NA |
| Sodium Butyrate                   | <1.5 | <1.5 | NA |
| Splitomicin                       | <1.5 | <1.5 | NA |
| Suramin (sodium salt)             | <1.5 | <1.5 | NA |
| trans-Resveratrol                 | <1.5 | <1.5 | NA |
| UNC0321 (trifluoroacetate salt)   | <1.5 | <1.5 | NA |
| UNC1215                           | <1.5 | <1.5 | NA |
| Valproic Acid (sodium salt)       | <1.5 | <1.5 | NA |
| Zebularine                        | <1.5 | <1.5 | NA |

\*selected from an epigenetic chemical library from Cayman Chemicals (cat. No. 11076)

**Table S6. Oligonucleotide sequences**

| shRNA target sequences |                        |
|------------------------|------------------------|
| Name                   | Target sequence        |
| shLuc                  | CTTACGCTGAGTACTTCGA    |
| sh-p53                 | GACTCCAGTGGTAATCTACT   |
| sh-p53#2               | GTAATCTACTGGGACGGAA    |
| shLIN28B#1             | GCAGGCATAATAAGCAAGTTA  |
| shLIN28B#3             | GGATTCATCTCCATGATAAAC  |
| shPLAG1#1              | GGAAGAAGCACATTCTTCTGT  |
| shPLAG1#2              | GCAAGAACTACAATACCAAGC  |
| shPLAGL1#1             | GAGAAGACGTTCAACCGGAAA  |
| shPLAGL1#2             | GTCAGTTACAATATGAGAAAAG |
| shMEN1#1               | GATCTACAAGGAGTTCTTTGA  |
| shMEN1#2               | GAGTACAGTCTGTATCAAACC  |

| Primer sequences for RT-qPCR |                        |
|------------------------------|------------------------|
| Name                         | Sequence               |
| LIN28B_Fw                    | GAAGACCCAAAGGGAAGACAC  |
| LIN28B_Rv                    | TTCTTTGGCTGAGGAGGTAGA  |
| PLAG1_Fw                     | ATTGTGATCGCCGGTTCTAC   |
| PLAG1_Rv                     | ATCCTTTCGCCCAAATCTCT   |
| PLAGL1_Fw                    | CAGACCGGAGACCTTCTGAG   |
| PLAGL1_Rv                    | TCTGGGCAGAAGCTCCTAAA   |
| Nkx2-2_Fw                    | AGTACTCCCTGCACGGTCTG   |
| Nkx2-2_Rv                    | GGGTCTCCTTGTCATTGTCC   |
| MBP_Fw                       | CCCACATGTAGTAAGCCACTC  |
| MBP_Rv                       | TGTCCTTCTCTCACCTCCTAAA |
| Actin_Fw                     | ACCCCATCGAGCACGGCATCG  |
| Actin_Rv                     | GTCACCGGAGTCCATCACGATG |
| MEN1_Fw                      | TCCAGTCCCTCTTCAGCTTC   |
| MEN1_Rv                      | ACCACAGCAAAGGCCACAC    |

| Primer sequences for ChIP-PCR |                       |
|-------------------------------|-----------------------|
| Name                          | Sequence              |
| MEN1_TSS_Fw                   | GCCCCCTCTCTACGACTGTG  |
| MEN1_TSS_Rv                   | AGGACTCTCCTTGGGGTTTG  |
| MEN1_Up5k_Fw                  | GCTGTGTGAGGAGGCATGTA  |
| MEN1_Up5k_Rv                  | CAACTCGAATTGACGGTTGA  |
| LIN28B_TSS_Fw                 | GGGGGCTATTGTTTGAATTGT |
| LIN28B_TSS_Rv                 | TTAAAGTTGGGGTGAATGG   |
| Nkx2-2_TSS_Fw                 | AGGGAGGGAGGGAAAGAAAG  |
| Nkx2-2_TSS_Rv                 | GCCAACCTTTGCGTTTTTAAT |



## REFERENCES

1. J. Schwartzenuber, A. Korshunov, X. Y. Liu, D. T. Jones, E. Pfaff, K. Jacob, D. Sturm, A. M. Fontebasso, D. A. Quang, M. Tönjes, V. Hovestadt, S. Albrecht, M. Kool, A. Nantel, C. Konermann, A. Lindroth, N. Jäger, T. Rausch, M. Ryzhova, J. O. Korbel, T. Hielscher, P. Hauser, M. Garami, A. Klekner, L. Bognar, M. Ebinger, M. U. Schuhmann, W. Scheurlen, A. Pekrun, M. C. Frühwald, W. Roggendorf, C. Kramm, M. Dürken, J. Atkinson, P. Lepage, A. Montpetit, M. Zakrzewska, K. Zakrzewski, P. P. Liberski, Z. Dong, P. Siegel, A. E. Kulozik, M. Zapatka, A. Guha, D. Malkin, J. Felsberg, G. Reifenberger, A. von Deimling, K. Ichimura, V. P. Collins, H. Witt, T. Milde, O. Witt, C. Zhang, P. Castelo-Branco, P. Lichter, D. Faury, U. Tabori, C. Plass, J. Majewski, S. M. Pfister, N. Jabado, Driver mutations in histone H3.3 and chromatin remodelling genes in paediatric glioblastoma. *Nature* **482**, 226–231 (2012). [Medline doi:10.1038/nature10833](#)
2. G. Wu, A. Broniscer, T. A. McEachron, C. Lu, B. S. Paugh, J. Becksfort, C. Qu, L. Ding, R. Huether, M. Parker, J. Zhang, A. Gajjar, M. A. Dyer, C. G. Mullighan, R. J. Gilbertson, E. R. Mardis, R. K. Wilson, J. R. Downing, D. W. Ellison, J. Zhang, S. J. Baker; St. Jude Children's Research Hospital–Washington University Pediatric Cancer Genome Project, Somatic histone H3 alterations in pediatric diffuse intrinsic pontine gliomas and non-brainstem glioblastomas. *Nat. Genet.* **44**, 251–253 (2012). [Medline doi:10.1038/ng.1102](#)
3. J. Zhang, G. Wu, C. P. Miller, R. G. Tatevossian, J. D. Dalton, B. Tang, W. Orisme, C. Punchihewa, M. Parker, I. Qaddoumi, F. A. Boop, C. Lu, C. Kandoth, L. Ding, R. Lee, R. Huether, X. Chen, E. Hedlund, P. Nagahawatte, M. Rusch, K. Boggs, J. Cheng, J. Becksfort, J. Ma, G. Song, Y. Li, L. Wei, J. Wang, S. Shurtleff, J. Easton, D. Zhao, R. S. Fulton, L. L. Fulton, D. J. Dooling, B. Vadodaria, H. L. Mulder, C. Tang, K. Ochoa, C. G. Mullighan, A. Gajjar, R. Kriwacki, D. Sheer, R. J. Gilbertson, E. R. Mardis, R. K. Wilson, J. R. Downing, S. J. Baker, D. W. Ellison; St. Jude Children's Research Hospital–Washington University Pediatric Cancer Genome Project, Whole-genome sequencing identifies genetic alterations in pediatric low-grade gliomas. *Nat. Genet.* **45**, 602–612 (2013). [Medline doi:10.1038/ng.2611](#)
4. D. Sturm, H. Witt, V. Hovestadt, D. A. Khuong-Quang, D. T. Jones, C. Konermann, E. Pfaff, M. Tönjes, M. Sill, S. Bender, M. Kool, M. Zapatka, N. Becker, M. Zucknick, T. Hielscher, X. Y. Liu, A. M. Fontebasso, M. Ryzhova, S. Albrecht, K. Jacob, M. Wolter, M. Ebinger, M. U. Schuhmann, T. van Meter, M. C. Frühwald, H. Hauch, A. Pekrun, B. Radlwimmer, T. Niehues, G. von Komorowski, M. Dürken, A. E. Kulozik, J. Madden, A. Donson, N. K. Foreman, R. Drissi, M. Fouladi, W. Scheurlen, A. von Deimling, C. Monoranu, W. Roggendorf, C. Herold-Mende, A. Unterberg, C. M. Kramm, J. Felsberg, C. Hartmann, B. Wiestler, W. Wick, T. Milde, O. Witt, A. M. Lindroth, J. Schwartzenuber, D. Faury, A. Fleming, M. Zakrzewska, P. P. Liberski, K. Zakrzewski, P. Hauser, M. Garami, A. Klekner, L. Bognar, S. Morrissy, F. Cavalli, M. D. Taylor, P. van Sluis, J. Koster, R. Versteeg, R. Volckmann, T. Mikkelsen, K. Aldape, G. Reifenberger, V. P. Collins, J. Majewski, A. Korshunov, P. Lichter, C. Plass, N. Jabado, S. M. Pfister, Hotspot mutations in H3F3A and IDH1 define distinct epigenetic and biological subgroups of glioblastoma. *Cancer Cell* **22**, 425–437 (2012). [Medline doi:10.1016/j.ccr.2012.08.024](#)

5. D.-A. Khuong-Quang, P. Buczkowicz, P. Rakopoulos, X. Y. Liu, A. M. Fontebasso, E. Bouffet, U. Bartels, S. Albrecht, J. Schwartzentruber, L. Letourneau, M. Bourgey, G. Bourque, A. Montpetit, G. Bourret, P. Lepage, A. Fleming, P. Lichter, M. Kool, A. von Deimling, D. Sturm, A. Korshunov, D. Faury, D. T. Jones, J. Majewski, S. M. Pfister, N. Jabado, C. Hawkins, K27M mutation in histone H3.3 defines clinically and biologically distinct subgroups of pediatric diffuse intrinsic pontine gliomas. *Acta Neuropathol.* **124**, 439–447 (2012). [Medline doi:10.1007/s00401-012-0998-0](#)
6. V. Tabar, L. Studer, Pluripotent stem cells in regenerative medicine: Challenges and recent progress. *Nat. Rev. Genet.* **15**, 82–92 (2014). [Medline doi:10.1038/nrg3563](#)
7. S. M. Chambers, C. A. Fasano, E. P. Papapetrou, M. Tomishima, M. Sadelain, L. Studer, Highly efficient neural conversion of human ES and iPS cells by dual inhibition of SMAD signaling. *Nat. Biotechnol.* **27**, 275–280 (2009). [Medline doi:10.1038/nbt.1529](#)
8. B. S. Paugh, X. Zhu, C. Qu, R. Endersby, A. K. Diaz, J. Zhang, D. A. Bax, D. Carvalho, R. M. Reis, A. Onar-Thomas, A. Broniscer, C. Wetmore, J. Zhang, C. Jones, D. W. Ellison, S. J. Baker, Novel oncogenic PDGFRA mutations in pediatric high-grade gliomas. *Cancer Res.* **73**, 6219–6229 (2013). [Medline doi:10.1158/0008-5472.CAN-13-1491](#)
9. P. W. Lewis, M. M. Müller, M. S. Koletsky, F. Cordero, S. Lin, L. A. Banaszynski, B. A. Garcia, T. W. Muir, O. J. Becher, C. D. Allis, Inhibition of PRC2 activity by a gain-of-function H3 mutation found in pediatric glioblastoma. *Science* **340**, 857–861 (2013). [Medline doi:10.1126/science.1232245](#)
10. K.-M. Chan, D. Fang, H. Gan, R. Hashizume, C. Yu, M. Schroeder, N. Gupta, S. Mueller, C. D. James, R. Jenkins, J. Sarkaria, Z. Zhang, The histone H3.3K27M mutation in pediatric glioma reprograms H3K27 methylation and gene expression. *Genes Dev.* **27**, 985–990 (2013). [Medline doi:10.1101/gad.217778.113](#)
11. S. Bender, Y. Tang, A. M. Lindroth, V. Hovestadt, D. T. Jones, M. Kool, M. Zapatka, P. A. Northcott, D. Sturm, W. Wang, B. Radlwimmer, J. W. Højfeldt, N. Truffaux, D. Castel, S. Schubert, M. Ryzhova, H. Seker-Cin, J. Gronych, P. D. Johann, S. Stark, J. Meyer, T. Milde, M. Schuhmann, M. Ebinger, C. M. Monoranu, A. Ponnuswami, S. Chen, C. Jones, O. Witt, V. P. Collins, A. von Deimling, N. Jabado, S. Puget, J. Grill, K. Helin, A. Korshunov, P. Lichter, M. Monje, C. Plass, Y. J. Cho, S. M. Pfister, Reduced H3K27me3 and DNA hypomethylation are major drivers of gene expression in K27M mutant pediatric high-grade gliomas. *Cancer Cell* **24**, 660–672 (2013). [Medline doi:10.1016/j.ccr.2013.10.006](#)
12. T. D. Halazonetis, V. G. Gorgoulis, J. Bartek, An oncogene-induced DNA damage model for cancer development. *Science* **319**, 1352–1355 (2008). [Medline doi:10.1126/science.1140735](#)
13. D. Hanahan, R. A. Weinberg, The hallmarks of cancer. *Cell* **100**, 57–70 (2000). [Medline doi:10.1016/S0092-8674\(00\)81683-9](#)
14. R. Sethi, J. Allen, B. Donahue, M. Karajannis, S. Gardner, J. Wisoff, S. Kunnakkat, J. Mathew, D. Zagzag, K. Newman, A. Narayana, Prospective neuraxis MRI surveillance reveals a high risk of leptomeningeal dissemination in diffuse intrinsic pontine glioma. *J. Neurooncol.* **102**, 121–127 (2011). [Medline doi:10.1007/s11060-010-0301-y](#)

15. Y. Elkabetz, G. Panagiotakos, G. Al Shamy, N. D. Socci, V. Tabar, L. Studer, Human ES cell-derived neural rosettes reveal a functionally distinct early neural stem cell stage. *Genes Dev.* **22**, 152–165 (2008). [Medline doi:10.1101/gad.1616208](#)
16. P. W. Lewis, C. D. Allis, Poisoning the “histone code” in pediatric gliomagenesis. *Cell Cycle* **12**, 3241–3242 (2013). [Medline doi:10.4161/cc.26356](#)
17. I. Ben-Porath, M. W. Thomson, V. J. Carey, R. Ge, G. W. Bell, A. Regev, R. A. Weinberg, An embryonic stem cell-like gene expression signature in poorly differentiated aggressive human tumors. *Nat. Genet.* **40**, 499–507 (2008). [Medline doi:10.1038/ng.127](#)
18. J. Grembecka, S. He, A. Shi, T. Purohit, A. G. Muntean, R. J. Sorenson, H. D. Showalter, M. J. Murai, A. M. Belcher, T. Hartley, J. L. Hess, T. Cierpicki, Menin-MLL inhibitors reverse oncogenic activity of MLL fusion proteins in leukemia. *Nat. Chem. Biol.* **8**, 277–284 (2012). [Medline doi:10.1038/nchembio.773](#)
19. S. Matkar, A. Thiel, X. Hua, Menin: A scaffold protein that controls gene expression and cell signaling. *Trends Biochem. Sci.* **38**, 394–402 (2013). [Medline doi:10.1016/j.tibs.2013.05.005](#)
20. A. Yokoyama, T. C. Somervaille, K. S. Smith, O. Rozenblatt-Rosen, M. Meyerson, M. L. Cleary, The menin tumor suppressor protein is an essential oncogenic cofactor for MLL-associated leukemogenesis. *Cell* **123**, 207–218 (2005). [Medline doi:10.1016/j.cell.2005.09.025](#)
21. S. R. Viswanathan, G. Q. Daley, Lin28: A microRNA regulator with a macro role. *Cell* **140**, 445–449 (2010). [Medline doi:10.1016/j.cell.2010.02.007](#)
22. Y. Hu, G. K. Smyth, ELDA: Extreme limiting dilution analysis for comparing depleted and enriched populations in stem cell and other assays. *J. Immunol. Methods* **347**, 70–78 (2009). [Medline doi:10.1016/j.jim.2009.06.008](#)
23. M. S. Bradbury, G. Panagiotakos, B. K. Chan, M. Tomishima, P. Zanzonico, J. Vider, V. Ponomarev, L. Studer, V. Tabar, Optical bioluminescence imaging of human ES cell progeny in the rodent CNS. *J. Neurochem.* **102**, 2029–2039 (2007). [Medline doi:10.1111/j.1471-4159.2007.04681.x](#)
24. R. A. Irizarry, B. Hobbs, F. Collin, Y. D. Beazer-Barclay, K. J. Antonellis, U. Scherf, T. P. Speed, Exploration, normalization, and summaries of high density oligonucleotide array probe level data. *Biostatistics* **4**, 249–264 (2003). [Medline doi:10.1093/biostatistics/4.2.249](#)
25. A. D. Goldberg, L. A. Banaszynski, K. M. Noh, P. W. Lewis, S. J. Elsaesser, S. Stadler, S. Dewell, M. Law, X. Guo, X. Li, D. Wen, A. Chapgier, R. C. DeKever, J. C. Miller, Y. L. Lee, E. A. Boydston, M. C. Holmes, P. D. Gregory, J. M. Greally, S. Rafii, C. Yang, P. J. Scambler, D. Garrick, R. J. Gibbons, D. R. Higgs, I. M. Cristea, F. D. Urnov, D. Zheng, C. D. Allis, Distinct factors control histone variant H3.3 localization at specific genomic regions. *Cell* **140**, 678–691 (2010). [Medline doi:10.1016/j.cell.2010.01.003](#)
26. B. Langmead, C. Trapnell, M. Pop, S. L. Salzberg, Ultrafast and memory-efficient alignment of short DNA sequences to the human genome. *Genome Biol.* **10**, R25 (2009). [Medline doi:10.1186/gb-2009-10-3-r25](#)

27. Y. Zhang, T. Liu, C. A. Meyer, J. Eeckhoutte, D. S. Johnson, B. E. Bernstein, C. Nusbaum, R. M. Myers, M. Brown, W. Li, X. S. Liu, Model-based analysis of ChIP-Seq (MACS). *Genome Biol.* **9**, R137 (2008). [Medline doi:10.1186/gb-2008-9-9-r137](#)
28. C. M. Johannessen, J. S. Boehm, S. Y. Kim, S. R. Thomas, L. Wardwell, L. A. Johnson, C. M. Emery, N. Stransky, A. P. Cogdill, J. Barretina, G. Caponigro, H. Hieronymus, R. R. Murray, K. Salehi-Ashtiani, D. E. Hill, M. Vidal, J. J. Zhao, X. Yang, O. Alkan, S. Kim, J. L. Harris, C. J. Wilson, V. E. Myer, P. M. Finan, D. E. Root, T. M. Roberts, T. Golub, K. T. Flaherty, R. Dummer, B. L. Weber, W. R. Sellers, R. Schlegel, J. A. Wargo, W. C. Hahn, L. A. Garraway, COT drives resistance to RAF inhibition through MAP kinase pathway reactivation. *Nature* **468**, 968–972 (2010). [Medline doi:10.1038/nature09627](#)
29. E. Campeau, V. E. Ruhl, F. Rodier, C. L. Smith, B. L. Rahmberg, J. O. Fuss, J. Campisi, P. Yaswen, P. K. Cooper, P. D. Kaufman, A versatile viral system for expression and depletion of proteins in mammalian cells. *PLOS ONE* **4**, e6529 (2009). [Medline doi:10.1371/journal.pone.0006529](#)
30. V. Tabar, G. Panagiotakos, E. D. Greenberg, B. K. Chan, M. Sadelain, P. H. Gutin, L. Studer, Migration and differentiation of neural precursors derived from human embryonic stem cells in the rat brain. *Nat. Biotechnol.* **23**, 601–606 (2005). [Medline doi:10.1038/nbt1088](#)
